# Supplementary material for: Non-host class II ribonucleotide reductase in Thermus viruses: sequence adaptation and host interaction
Source: PeerJ. 2019 Apr 8;7:e6700. doi: 10.7717/peerj.6700 (PMC6459318; doi:10.7717/peerj.6700)
Supplement: Supplemental Information 3 [file peerj-07-6700-s003.xlsx]

## Sheet: Sheet1
id	taxon
2654588068	Planctomycetes bacterium DG_23
2721755254	Syntrophobacterales bacterium GWF2_56_9
2626542276	Microgenomates (Daviesbacteria) bacterium GW2011_GWA2_38_24
2713897409	Sulfurimonas sp. RIFOXYB2_FULL_37_5
2711768568	candidate division WOR-1 bacterium RIFOXYA2_FULL_37_7
2585428050	AP Phormidesmis priestleyi str ANA first draft
2716884138	Candidatus Yonathbacteria bacterium RIFOXYC2_FULL_47_9
2710264572	Candidatus Curtissbacteria bacterium RIFCSPHIGHO2_02_FULL_42_58
2582580697	Composite genome from Trout Bog Hypolimnion pan-assembly TBhypo.metabat.5629
2626541989	Parcubacteria bacterium GW2011_GWA2_44_15
2716884184	Candidatus Moranbacteria bacterium RIFOXYD1_FULL_44_9
2728369324	Archaeoglobus sp. JdFR-36
2626542095	Parcubacteria bacterium GW2011_GWA2_49_9
2711768563	Candidatus Yanofskybacteria bacterium RIFOXYA2_FULL_45_28
2708742779	Actinobacteria bacterium RBG_16_68_21
2708742573	Candidatus Woesebacteria bacterium GWA1_42_12
2708742891	Candidatus Zambryskibacteria bacterium RIFCSPHIGHO2_01_FULL_43_25
2711768769	Candidatus Falkowbacteria bacterium RIFOXYC12_FULL_34_55
2728369430	Candidatus Aminicenantes bacterium JdFR-77
2708742808	Bacteroidetes bacterium RBG_19FT_COMBO_42_7
2582580635	Composite genome from Trout Bog Epilimnion pan-assembly TBepi.metabat.4208
2708743081	Candidatus Wildermuthbacteria bacterium RIFCSPHIGHO2_01_FULL_48_27b
2728369314	Archaeoglobus sp. JdFR-28
2721755354	Chloroflexi bacterium RBG_13_51_36
2711768551	Candidatus Peregrinibacteria bacterium RIFOXYA2_FULL_33_7
2710723785	candidate division WWE3 bacterium RIFCSPLOWO2_01_FULL_39_13
2728369422	Peptococcaceae bacterium JdFR-69
2626541943	Parcubacteria (Nomurabacteria) bacterium GW2011_GWA2_40_9
2710264566	Candidatus Levybacteria bacterium RIFCSPHIGHO2_02_FULL_39_36
2710723918	Candidatus Buchananbacteria bacterium RIFCSPLOWO2_01_FULL_45_31
2710264570	Candidatus Roizmanbacteria bacterium RIFCSPHIGHO2_02_FULL_40_53
2626541793	Parcubacteria bacterium GW2011_GWC2_52_8c
2710723587	Candidatus Curtissbacteria bacterium RIFCSPHIGHO2_12_FULL_42_33
2626541762	Parcubacteria bacterium GW2011_GWC2_44_22
2708743092	Parcubacteria group bacterium RIFCSPHIGHO2_01_FULL_56_18
2728369304	Candidatus Bathyarchaeota archaeon JdFR-06
2711768365	Betaproteobacteria bacterium RIFCSPLOWO2_12_FULL_63_13
2626541736	Parcubacteria bacterium GW2011_GWE2_42_14
2582580561	Composite genome from Lake Mendota Epilimnion pan-assembly MEint.metabat.3080
2582580586	Composite genome from Lake Mendota Epilimnion pan-assembly MEint.metabat.5513
2710264656	Bdellovibrionales bacterium RIFCSPHIGHO2_02_FULL_40_15
2710723959	Candidatus Roizmanbacteria bacterium RIFCSPLOWO2_01_FULL_45_11
2785510863	Parcubacteria bacterium CG11_big_fil_rev_8_21_14_0_20_41_14
2710723933	Candidatus Komeilibacteria bacterium RIFCSPLOWO2_01_FULL_52_15
2728369309	Archaeoglobus sp. JdFR-35
2626542329	Parcubacteria bacterium GW2011_GWA1_43_21
2711768505	Candidatus Roizmanbacteria bacterium RIFOXYA1_FULL_37_12
2786546697	Hydrogenophilales bacterium CG_4_9_14_3_um_filter_63_34
2711768369	Chlamydiae bacterium RIFCSPLOWO2_12_FULL_49_12
2710723564	Rhodobacterales bacterium RIFCSPHIGHO2_12_FULL_62_75
2603880213	AP Yellowstone National Park Obsidian Pool site 2 B7
2708743057	Candidatus Azambacteria bacterium RIFCSPHIGHO2_01_FULL_40_24
2710264744	Candidatus Giovannonibacteria bacterium RIFCSPHIGHO2_02_FULL_46_20
2786546545	Actinobacteria bacterium CG_4_8_14_3_um_filter_50_135
2710723654	Candidatus Saccharibacteria bacterium RIFCSPHIGHO2_12_FULL_48_21
2582580555	Composite genome from Lake Mendota Epilimnion pan-assembly MEint.metabat.283
2711768535	Ignavibacteria bacterium RIFOXYA12_FULL_35_25
2626541760	Parcubacteria (Giovannonibacteria) bacterium GW2011_GWC2_43_8
2786546455	Candidatus Omnitrophica bacterium CG_4_8_14_3_um_filter_43_15
2582580651	Composite genome from Trout Bog Hypolimnion pan-assembly TBhypo.metabat.111
2711768561	Candidatus Uhrbacteria bacterium RIFOXYA2_FULL_40_9
2710723546	Fluviicola sp. RIFCSPHIGHO2_12_FULL_43_24
2708743090	Candidatus Adlerbacteria bacterium RIFCSPHIGHO2_01_FULL_54_23
2582580625	Composite genome from Trout Bog Epilimnion pan-assembly TBepi.metabat.2493
2786546565	Anaerolineae bacterium CG17_big_fil_post_rev_8_21_14_2_50_57_27
2708742627	Syntrophobacterales bacterium GWC2_56_13
2721755406	Candidatus Lloydbacteria bacterium RIFCSPLOWO2_12_FULL_51_9
2734482264	Dyella sp. AD052
2708742858	Acidobacteria bacterium RIFCSPHIGHO2_01_FULL_67_28
2786546227	Candidatus Uhrbacteria bacterium CG10_big_fil_rev_8_21_14_0_10_48_16
2582580524	Composite genome from Lake Mendota Epilimnion pan-assembly MEint.metabat.12657
2713897381	Ignavibacteria bacterium RIFOXYB2_FULL_37_11
2711768739	Candidatus Nealsonbacteria bacterium RIFOXYC1_FULL_40_7
2626542476	Microgenomates bacterium GW2011_GWC1_44_37
2721755362	Candidatus Curtissbacteria bacterium RBG_13_35_7
2785510821	Candidatus Pacearchaeota archaeon CG_4_9_14_3_um_filter_30_11
2710723850	Candidatus Levybacteria bacterium RIFCSPLOWO2_01_FULL_37_20
2626542439	Microgenomates (Woesebacteria) bacterium GW2011_GWA2_33_20
2721755236	Deltaproteobacteria bacterium GWD2_42_10
2786546271	Candidatus Peregrinibacteria bacterium CG11_big_fil_rev_8_21_14_0_20_46_8
2710724066	Candidatus Rokubacteria bacterium RIFCSPLOWO2_02_FULL_68_19
2710723636	Candidatus Zambryskibacteria bacterium RIFCSPHIGHO2_12_FULL_39_21
2721755326	Candidatus Colwellbacteria bacterium RBG_13_48_8
2710723722	Candidatus Yanofskybacteria bacterium RIFCSPLOWO2_01_FULL_41_67
2788500437	Bdellovibrio sp. CG22_combo_CG10-13_8_21_14_all_39_27
2710723662	Legionellales bacterium RIFCSPHIGHO2_12_FULL_42_9
2711768207	Omnitrophica WOR_2 bacterium RIFCSPLOWO2_02_FULL_50_19
2626541953	Microgenomates (Collierbacteria) bacterium GW2011_GWF1_42_50
2721755287	Planctomycetes bacterium GWF2_40_8
2626541883	Parcubacteria (Wolfebacteria) bacterium GW2011_GWE2_47_12
2785510811	Candidatus Pacearchaeota archaeon CG_4_9_14_3_um_filter_31_7
2710723889	Elusimicrobia bacterium RIFCSPLOWO2_01_FULL_60_11
2708742617	Nitrospirae bacterium GWC2_42_7
2710723938	Candidatus Kaiserbacteria bacterium RIFCSPLOWO2_01_FULL_54_24
2710724098	Candidatus Giovannonibacteria bacterium RIFCSPLOWO2_02_FULL_45_28
2786546217	Candidatus Uhrbacteria bacterium CG10_big_fil_rev_8_21_14_0_10_41_26
2710723943	Candidatus Roizmanbacteria bacterium RIFCSPLOWO2_01_FULL_37_16
2710723712	Candidatus Nomurabacteria bacterium RIFCSPLOWO2_01_FULL_37_25
2728369434	Unclassified bacterium JdFR-70
2788499808	Bacteroidetes bacterium CG02_land_8_20_14_3_00_31_25
2710264574	Omnitrophica bacterium RIFCSPHIGHO2_02_FULL_46_11
2710724072	Deltaproteobacteria bacterium RIFCSPLOWO2_02_FULL_47_10
2710723720	Candidatus Nomurabacteria bacterium RIFCSPLOWO2_01_FULL_41_21
2711768578	Candidatus Staskawiczbacteria bacterium RIFOXYA2_FULL_32_7
2721755316	Actinobacteria bacterium RBG_13_63_9
2708742845	Candidatus Moranbacteria bacterium RBG_19FT_COMBO_42_6
2710723794	Candidatus Terrybacteria bacterium RIFCSPLOWO2_01_FULL_58_14
2710723702	Candidatus Nealsonbacteria bacterium RIFCSPLOWO2_01_FULL_43_32
2710723660	Candidatus Doudnabacteria bacterium RIFCSPHIGHO2_12_FULL_47_25
2708742703	Candidatus Aminicenantes bacterium RBG_16_63_14
2626541935	Microgenomates (Shapirobacteria) bacterium GW2011_GWE1_38_10
2623621018	Unknown Accumulibacter genome from EPBR bioreactor metagenome
2630968269	Nostoc sp. sp2 extraction
2721755262	Tenericutes bacterium GWF2_57_13
2593339183	Composite genome from Trout Bog Hypolimnion pan-assembly TBhypo.metabat.2922.v2
2721755226	Nitrospirae bacterium GWD2_57_8
2708742828	Actinobacteria bacterium RBG_19FT_COMBO_36_27
2710723556	Candidatus Levybacteria bacterium RIFCSPHIGHO2_12_FULL_37_9
2654588071	candidate division Zixibacteria bacterium SM1_73
2626542195	Parcubacteria (Nomurabacteria) bacterium GW2011_GWC2_35_35
2785511182	Candidatus Nealsonbacteria bacterium CG15_BIG_FIL_POST_REV_8_21_14_020_37_12
2708742607	Spirochaetes bacterium GWB1_60_80
2710723710	Candidatus Staskawiczbacteria bacterium RIFCSPLOWO2_01_FULL_33_9
2710723626	Coxiella sp. RIFCSPHIGHO2_12_FULL_42_15
2721755306	Candidatus Coatesbacteria bacterium RBG_13_66_14
2626542393	candidate division WWE3 bacterium GW2011_GWF2_42_42
2711768526	Lentisphaerae bacterium RIFOXYA12_FULL_48_11
2708743094	Candidatus Uhrbacteria bacterium RIFCSPHIGHO2_01_FULL_63_20
2728369442	Anaerolineales bacterium JdFR-62
2710723700	Candidatus Levybacteria bacterium RIFCSPLOWO2_01_FULL_40_64
2711768758	Candidatus Moranbacteria bacterium RIFOXYC12_FULL_36_13
2721755126	Gallionellales bacterium GWA2_55_18
2711768684	Candidatus Woesebacteria bacterium RIFOXYB1_FULL_31_120
2626542339	Parcubacteria (Nomurabacteria) bacterium GW2011_GWA1_46_11
2728369424	Desulfarculaceae bacterium JdFR-98
2626541951	Microgenomates (Shapirobacteria) bacterium GW2011_GWE2_38_30
2710723993	Alphaproteobacteria bacterium RIFCSPLOWO2_02_FULL_40_19
2711768558	Bacteroidetes bacterium RIFOXYA2_FULL_33_7
2721755260	Verrucomicrobia bacterium GWF2_51_19
2721755162	Pelobacteraceae bacterium GWB2_53_15
2626541881	Parcubacteria (Uhrbacteria) bacterium GW2011_GWE2_46_68
2721755216	Elusimicrobia bacterium GWC2_63_65
2708742996	Candidatus Zambryskibacteria bacterium RIFCSPHIGHO2_01_FULL_49_18
2721755187	Bacteroidetes bacterium GWC2_46_850
2721755199	Nitrospirae bacterium GWC2_57_13
2626542376	candidate division WWE3 bacterium GW2011_GWB2_43_22
2785511267	Candidatus Falkowbacteria bacterium CG10_big_fil_rev_8_21_14_0_10_44_15
2626541836	candidate division WS6 bacterium GW2011_WS6_33_547
2708742985	Candidatus Yonathbacteria bacterium RIFCSPHIGHO2_01_FULL_44_41
2626541925	Microgenomates (Woesebacteria) bacterium GW2011_GWC2_33_12
2582580588	Composite genome from Lake Mendota Epilimnion pan-assembly MEint.metabat.5983
2626542176	Parcubacteria (Azambacteria) bacterium GW2011_GWB1_46_27
2728369414	Candidatus Aminicenantes bacterium JdFR-80
2728369440	Unclassified bacterium JdFR-53
2708743124	candidate division WWE3 bacterium RIFCSPHIGHO2_01_FULL_42_13
2785510962	Candidatus Kuenenbacteria bacterium CG_4_8_14_3_um_filter_39_15
2713897373	candidate division WOR-1 bacterium RIFOXYB2_FULL_42_35
2721755116	Tenericutes bacterium GWA2_35_7
2721755206	Geobacteraceae bacterium GWC2_48_7
2626541746	Parcubacteria (Nomurabacteria) bacterium GW2011_GWF2_35_12
2582580683	Composite genome from Trout Bog Hypolimnion pan-assembly TBhypo.metabat.4247
2710723847	Candidatus Sungbacteria bacterium RIFCSPLOWO2_01_FULL_60_25
2593339181	Composite genome from Trout Bog Hypolimnion pan-assembly TBhypo.metabat.2519.v2
2708742952	Candidatus Woesebacteria bacterium RIFCSPHIGHO2_01_FULL_38_9
2711768752	Candidatus Azambacteria bacterium RIFOXYC1_FULL_41_20
2626542239	Parcubacteria bacterium GW2011_GWD1_40_9
2708742721	Candidatus Atribacteria bacterium RBG_16_35_8
2708742547	Euryarchaeota archaeon RBG_13_31_8
2626542388	candidate division WWE3 bacterium GW2011_GWE1_44_51
2710723606	Candidatus Portnoybacteria bacterium RIFCSPHIGHO2_12_FULL_40_11
2708743020	Candidatus Blackburnbacteria bacterium RIFCSPHIGHO2_01_FULL_43_15b
2710723928	Candidatus Ryanbacteria bacterium RIFCSPLOWO2_01_FULL_48_26
2708742818	Candidatus Woesebacteria bacterium RBG_19FT_COMBO_42_9
2626541915	Microgenomates (Collierbacteria) bacterium GW2011_GWC1_45_47
2711768486	Candidatus Shapirobacteria bacterium RIFOXYA1_FULL_39_17
2785511096	Candidatus Berkelbacteria bacterium CG10_big_fil_rev_8_21_14_0_10_41_12
2721755106	Omnitrophica WOR_2 bacterium GWA2_53_43
2785510936	candidate division Gribaldobacteria bacterium CG10_big_fil_rev_8_21_14_0_10_37_46
2710264599	Candidatus Nomurabacteria bacterium RIFCSPHIGHO2_02_FULL_37_45
2630968270	Nostoc sp. Pleu-09-321 extraction
2785510960	Candidatus Niyogibacteria bacterium CG10_big_fil_rev_8_21_14_0_10_42_19
2651869529	Actinobacteria FNEB6 bin_3 acI-B
2626542429	Microgenomates (Beckwithbacteria) bacterium GW2011_GWA1_46_30
2626542139	Parcubacteria (Giovannonibacteria) bacterium GW2011_GWB1_43_13
2711768697	Candidatus Veblenbacteria bacterium RIFOXYB1_FULL_43_13
2626541905	Microgenomates bacterium GW2011_GWC1_43_11
2582580563	Composite genome from Lake Mendota Epilimnion pan-assembly MEint.metabat.3085
2710264528	Candidatus Buchananbacteria bacterium RIFCSPHIGHO2_02_FULL_40_13
2708742859	Alphaproteobacteria bacterium RIFCSPHIGHO2_01_FULL_41_14
2626542039	Parcubacteria (Kaiserbacteria) bacterium GW2011_GWA1_50_28
2728369432	Candidatus Acetothermia bacterium JdFR-48
2582580538	Composite genome from Lake Mendota Epilimnion pan-assembly MEint.metabat.16806
2786546725	Bdellovibrionales bacterium CG22_combo_CG10-13_8_21_14_all_38_13
2786546738	Nitrosopumilales archaeon CG15_BIG_FIL_POST_REV_8_21_14_020_37_12
2721755299	Candidatus Woykebacteria bacterium RBG_13_40_7b
2711768786	Alphaproteobacteria bacterium RIFOXYD12_FULL_60_8
2710723888	Deltaproteobacteria bacterium RIFCSPLOWO2_01_FULL_42_9
2626542182	candidate division TM6 bacterium GW2011_GWF2_32_72
2786546537	Bacteroidetes bacterium CG12_big_fil_rev_8_21_14_0_65_60_17
2711768527	Deltaproteobacteria bacterium RIFOXYA12_FULL_61_11
2711768275	Candidatus Kaiserbacteria bacterium RIFCSPLOWO2_02_FULL_55_12
2785511185	Candidatus Nealsonbacteria bacterium CG_4_10_14_0_8_um_filter_35_10
2785511116	Candidatus Portnoybacteria bacterium CG03_land_8_20_14_0_80_41_10
2721755164	Desulfobacterales bacterium GWB2_56_26
2654588061	candidate division BRC1 bacterium SM23_51
2626542359	Parcubacteria (Nomurabacteria) bacterium GW2011_GWA2_35_80
2785511206	Candidatus Nealsonbacteria bacterium CG07_land_8_20_14_0_80_39_13
2786546715	Ignavibacteriales bacterium CG_4_9_14_3_um_filter_34_10
2716884186	Candidatus Woesebacteria bacterium RIFOXYD1_FULL_31_53
2710723984	Nitrospirae bacterium RIFCSPLOWO2_02_42_7
2626541812	Microgenomates (Levybacteria) bacterium GW2011_GWB1_37_8
2786546766	Gallionellales bacterium CG17_big_fil_post_rev_8_21_14_2_50_54_146
2582580517	Composite genome from Lake Mendota Epilimnion pan-assembly MEint.metabat.1091
2593339184	Composite genome from Trout Bog Hypolimnion pan-assembly TBhypo.metabat.3520.v2
2626542118	Parcubacteria (Jorgensenbacteria) bacterium GW2011_GWB1_49_9
2728369336	Archaeoglobus sp. JdFR-33
2626542308	Microgenomates bacterium GW2011_GWD1_33_9
2785511110	Candidatus Jorgensenbacteria bacterium CG_4_10_14_0_8_um_filter_39_13
2710723599	Gammaproteobacteria bacterium RIFCSPHIGHO2_12_FULL_41_20
2626541820	Microgenomates (Daviesbacteria) bacterium GW2011_GWB1_39_5
2626542345	Parcubacteria (Yanofskybacteria) bacterium GW2011_GWA1_48_10
2626542180	Parcubacteria (Giovannonibacteria) bacterium GW2011_GWB1_47_6b
2785511156	Candidatus Woesearchaeota archaeon CG10_big_fil_rev_8_21_14_0_10_30_7
2788500151	Flavobacteriaceae bacterium CG_4_9_14_0_8_um_filter_31_91
2626542018	Berkelbacteria bacterium GW2011_GWA1_39_10
2626541802	Parcubacteria (Nomurabacteria) bacterium GW2011_GWD2_36_14
2788500115	Comamonadaceae bacterium CG_4_10_14_3_um_filter_60_42
2626541963	Parcubacteria (Moranbacteria) bacterium GW2011_GWF2_37_7
2785511260	Candidatus Falkowbacteria bacterium CG02_land_8_20_14_3_00_36_14
2713897385	Candidatus Falkowbacteria bacterium RIFOXYB2_FULL_47_14
2711768708	candidate division WWE3 bacterium RIFOXYB1_FULL_42_27
2716884197	Candidatus Yanofskybacteria bacterium RIFOXYD1_FULL_42_10
2711768678	candidate division WS6 bacterium RIFOXYB1_FULL_33_15
2710724009	Alphaproteobacteria bacterium RIFCSPLOWO2_02_FULL_43_54
2711768517	candidate division WWE3 bacterium RIFOXYA12_FULL_43_11
2710723539	Burkholderiales bacterium RIFCSPHIGHO2_12_FULL_65_48
2626541810	Microgenomates (Levybacteria) bacterium GW2011_GWB1_36_18
2711768741	Candidatus Veblenbacteria bacterium RIFOXYC1_FULL_42_9
2710723567	Burkholderiales bacterium RIFCSPHIGHO2_12_FULL_67_38
2711768768	Ignavibacteria bacterium RIFOXYC12_FULL_38_8
2582580705	Composite genome from Trout Bog Hypolimnion pan-assembly TBhypo.metabat.680
2785511062	Candidatus Pacebacteria bacterium CG_4_9_14_0_2_um_filter_34_50
2582580507	AP Rhodobaca sp. first draft
2626542082	Parcubacteria (Giovannonibacteria) bacterium GW2011_GWA2_53_7
2786546275	Candidatus Peregrinibacteria bacterium CG10_big_fil_rev_8_21_14_0_10_36_19
2710723572	Omnitrophica WOR_2 bacterium RIFCSPHIGHO2_12_FULL_64_13
2626542259	Parcubacteria bacterium GW2011_GWC1_43_11
2713897334	Candidatus Portnoybacteria bacterium RIFCSPHIGHO2_12_FULL_38_9
2785511215	Candidatus Nealsonbacteria bacterium CG11_big_fil_rev_8_21_14_0_20_35_11
2626541800	Parcubacteria bacterium GW2011_GWD2_35_7
2626541927	Microgenomates (Roizmanbacteria) bacterium GW2011_GWC2_35_12
2626542208	Parcubacteria bacterium GW2011_GWB1_56_8
2786546447	Candidatus Omnitrophica bacterium CG10_big_fil_rev_8_21_14_0_10_43_8
2710264674	Candidatus Staskawiczbacteria bacterium RIFCSPHIGHO2_02_FULL_34_9
2582580693	Composite genome from Trout Bog Hypolimnion pan-assembly TBhypo.metabat.4964
2785510851	Candidatus Dojkabacteria bacterium CG_4_9_14_3_um_filter_150_Dojkabacteria_WS6_41_13
2786546527	Euryarchaeota archaeon CG01_land_8_20_14_3_00_38_12
2710264529	Candidatus Magasanikbacteria bacterium RIFCSPHIGHO2_02_FULL_41_13
2710723591	Planctomycetes bacterium RIFCSPHIGHO2_12_FULL_51_37
2785511084	Candidatus Berkelbacteria bacterium CG_4_10_14_0_2_um_filter_35_9_33_12
2708742869	Candidatus Daviesbacteria bacterium RIFCSPHIGHO2_01_FULL_44_29
2728369326	Archaeoglobus sp. JdFR-24
2786546278	Candidatus Peregrinibacteria bacterium CG10_big_fil_rev_8_21_14_0_10_49_10
2711768733	Candidatus Woesebacteria bacterium RIFOXYC1_FULL_43_18
2711768473	Candidatus Portnoybacteria bacterium RBG_13_40_8
2710264699	Candidatus Uhrbacteria bacterium RIFCSPHIGHO2_02_FULL_47_29
2626542159	Parcubacteria bacterium GW2011_GWC1_45_13
2582580602	Composite genome from Lake Mendota Epilimnion pan-assembly MEint.metabat.7257
2710723566	Alphaproteobacteria bacterium RIFCSPHIGHO2_12_FULL_42_100
2710723570	Gammaproteobacteria bacterium RIFCSPHIGHO2_12_FULL_41_25
2626542008	Parcubacteria bacterium GW2011_GWF2_44_7
2626542027	Parcubacteria bacterium GW2011_GWA2_45_30
2582580653	Composite genome from Trout Bog Hypolimnion pan-assembly TBhypo.metabat.1542
2711768347	Candidatus Yanofskybacteria bacterium RIFCSPLOWO2_12_FULL_44_13b
2626541961	Microgenomates (Daviesbacteria) bacterium GW2011_GWF2_38_7
2708742778	Candidatus Woykebacteria bacterium RBG_16_43_9
2626542059	candidate division WS6 bacterium GW2011_GWC1_33_20
2642422569	Spirochaeta TBE6_bin-43
2785510980	Caldiserica bacterium CG23_combo_of_CG06-09_8_20_14_all_35_60
2710723675	Candidatus Roizmanbacteria bacterium RIFCSPHIGHO2_12_FULL_38_13
2708742748	Betaproteobacteria bacterium RBG_16_66_20
2708742950	Deltaproteobacteria bacterium RIFCSPHIGHO2_01_FULL_43_49
2785510815	candidate division Huberarchaea archaeon CG_4_9_14_3_um_filter_31_125
2728369316	Crenarchaeota archaeon JdFR-12
2785510789	Candidatus Pacearchaeota archaeon CG10_big_fil_rev_8_21_14_0_10_32_14
2708742589	Elusimicrobia bacterium GWA2_69_24
2711768437	Candidatus Zambryskibacteria bacterium RIFCSPLOWO2_12_FULL_39_23
2710264746	Candidatus Sungbacteria bacterium RIFCSPHIGHO2_02_FULL_52_23
2785510970	Candidatus Kuenenbacteria bacterium CG10_big_fil_rev_8_21_14_0_10_39_14
2710723750	Candidatus Zambryskibacteria bacterium RIFCSPLOWO2_01_FULL_52_12
2721755136	Bacteroidetes bacterium GWA2_31_9b
2786546678	Alphaproteobacteria bacterium CG_4_10_14_0_8_um_filter_53_9
2710723873	candidate division WWE3 bacterium RIFCSPLOWO2_01_FULL_42_11
2711768723	Candidatus Pacebacteria bacterium RIFOXYC1_FULL_39_21
2708742769	Chloroflexi bacterium RBG_16_48_7
2710724070	Candidatus Doudnabacteria bacterium RIFCSPLOWO2_02_FULL_42_9
2728369306	Archaeoglobus sp. JdFR-41
2626541885	Parcubacteria (Moranbacteria) bacterium GW2011_GWF1_34_10
2710723969	Omnitrophica bacterium RIFCSPLOWO2_01_FULL_45_24
2708742944	Candidatus Peribacteria bacterium RIFCSPHIGHO2_01_FULL_51_35
2626542425	Microgenomates (Collierbacteria) bacterium GW2011_GWA1_45_15
2785510886	candidate division Ratteibacteria bacterium CG_4_8_14_3_um_filter_41_36
2651869536	TM7 FNEB6 bin_52
2711768731	Candidatus Adlerbacteria bacterium RIFOXYC1_FULL_48_26
2786546365	Elusimicrobia bacterium CG_4_10_14_0_2_um_filter_56_8
2711768247	Methylotenera sp. RIFCSPLOWO2_02_FULL_45_14
2711768713	Candidatus Staskawiczbacteria bacterium RIFOXYC1_FULL_38_18
2711768471	Gemmatimonadetes bacterium RIFCSPLOWO2_12_FULL_68_9
2785510938	Parcubacteria bacterium CG_4_10_14_0_8_um_filter_35_7
2634166239	Methylophilaceae-49 (UID203)
2710723982	Sulfuricurvum sp. RIFCSPLOWO2_02_43_6
2786546741	Nitrosopumilales archaeon CG_4_9_14_0_2_um_filter_34_16
2626542065	Peregrinibacteria bacterium GW2011_GWA2_54_9
2630968271	Nostoc sp. Hyl-09-2-6 extraction
2710264598	Candidatus Daviesbacteria bacterium RIFCSPHIGHO2_02_FULL_36_13
2728369454	Pseudomonas sp. JdFR-93
2785510879	Candidatus Desantisbacteria bacterium CG_4_9_14_3_um_filter_40_11
2708742880	Candidatus Nomurabacteria bacterium RIFCSPHIGHO2_01_FULL_39_10
2593339185	Composite genome from Trout Bog Hypolimnion pan-assembly TBhypo.metabat.3765.v2
2710264687	Candidatus Yanofskybacteria bacterium RIFCSPHIGHO2_02_FULL_43_17
2626541988	Parcubacteria (Giovannonibacteria) bacterium GW2011_GWA2_44_13b
2710264548	Candidatus Uhrbacteria bacterium RIFCSPHIGHO2_02_FULL_47_44
2626542116	Parcubacteria bacterium GW2011_GWB1_49_12
2716884163	Candidatus Collierbacteria bacterium RIFOXYD1_FULL_40_9
2785510843	candidate division Gribaldobacteria bacterium CG_4_9_14_3_um_filter_33_9
2710724008	Ignavibacteria bacterium RIFCSPLOWO2_02_FULL_55_14
2708742647	Gammaproteobacteria bacterium GWE2_37_16
2711768721	Candidatus Curtissbacteria bacterium RIFOXYC1_FULL_41_36
2710723980	Candidatus Nealsonbacteria bacterium RIFCSPLOWO2_02_39_8
2711768663	Candidatus Amesbacteria bacterium RIFOXYB1_FULL_47_12
2785510987	Candidatus Kerfeldbacteria bacterium CG_4_9_14_3_um_filter_45_8
2710723513	Chlamydiae bacterium RIFCSPHIGHO2_12_FULL_44_59
2710264519	Elusimicrobia bacterium RIFCSPHIGHO2_02_FULL_39_36
2651869526	TM7 FNEB6 bin_28
2710264672	Candidatus Rokubacteria bacterium RIFCSPHIGHO2_02_FULL_73_26
2786546247	Nitrospinae bacterium CG22_combo_CG10-13_8_21_14_all_47_10
2708742848	Thermodesulfovibrio sp. RBG_19FT_COMBO_41_18
2785511283	Candidatus Micrarchaeota archaeon CG09_land_8_20_14_0_10_60_16
2721755360	Deltaproteobacteria bacterium RBG_13_52_11b
2608642204	Rhodobacteraceae bacterium bin 12
2582580663	Composite genome from Trout Bog Hypolimnion pan-assembly TBhypo.metabat.2565
2716884158	Candidatus Azambacteria bacterium RIFOXYD1_FULL_42_11
2708742673	Bacteroidetes bacterium GWF2_33_16
2785511354	Candidatus Magasanikbacteria bacterium CG_4_10_14_0_2_um_filter_41_31
2711768701	Candidatus Kaiserbacteria bacterium RIFOXYB1_FULL_46_14
2654588091	candidate division WOR_1 bacterium DG_54_3
2785510956	Candidatus Brennerbacteria bacterium CG_4_8_14_3_um_filter_43_14
2708743088	Candidatus Azambacteria bacterium RIFCSPHIGHO2_01_FULL_51_74
2711768417	Alphaproteobacteria bacterium RIFCSPLOWO2_12_FULL_42_29
2654587940	Phycisphaerae bacterium SM1_79
2710264670	Fluviicola sp. RIFCSPHIGHO2_02_FULL_43_260
2651869516	Bacteroidetes FNEB7 bin_38
2710723734	Candidatus Taylorbacteria bacterium RIFCSPLOWO2_01_FULL_45_15b
2626541978	Parcubacteria (Magasanikbacteria) bacterium GW2011_GWA2_41_55
2710723529	Candidatus Levybacteria bacterium RIFCSPHIGHO2_12_FULL_39_9
2786546427	Candidatus Omnitrophica bacterium CG23_combo_of_CG06-09_8_20_14_all_41_10
2710264666	Omnitrophica WOR_2 bacterium RIFCSPHIGHO2_02_FULL_46_37
2786546731	Syntrophobacterales bacterium CG_4_8_14_3_um_filter_49_14
2634166231	Methylophilus methylotrophus-129-2 (UID203)
2721755346	Bacteroidetes bacterium RBG_13_44_24
2708743037	Candidatus Roizmanbacteria bacterium RIFCSPHIGHO2_01_FULL_39_24
2786546525	Chloroflexi bacterium CG08_land_8_20_14_0_20_45_12
2626541764	Microgenomates (Woesebacteria) bacterium GW2011_GWA2_44_33
2721755364	Omnitrophica WOR_2 bacterium RBG_13_41_10
2651869506	Spirochaetes FNEB7 bin_3
2711768661	Caulobacterales bacterium RIFOXYB1_FULL_67_16
2786546373	Elusimicrobia bacterium CG_4_10_14_0_2_um_filter_63_34
2786546265	Candidatus Peregrinibacteria bacterium CG11_big_fil_rev_8_21_14_0_20_41_10
2626541799	Parcubacteria bacterium GW2011_GWD1_44_9
2708742763	Chloroflexi bacterium RBG_16_58_14
2786546337	Candidatus Roizmanbacteria bacterium CG17_big_fil_post_rev_8_21_14_2_50_39_7
2708742942	Candidatus Kaiserbacteria bacterium RIFCSPHIGHO2_01_FULL_54_36b
2710723742	Candidatus Uhrbacteria bacterium RIFCSPLOWO2_01_FULL_47_25
2786546703	Hydrogenophilales bacterium CG_4_10_14_0_8_um_filter_62_70
2786546663	Deltaproteobacteria bacterium CG_4_10_14_3_um_filter_51_14
2711768371	Deltaproteobacteria bacterium RIFCSPLOWO2_12_FULL_40_28
2721755160	Nitrospirae bacterium GWB2_47_37
2710723664	Candidatus Yanofskybacteria bacterium RIFCSPHIGHO2_12_FULL_41_9
2785511281	Candidatus Micrarchaeota archaeon CG08_land_8_20_14_0_20_59_11
2711768327	Deltaproteobacteria bacterium RIFCSPLOWO2_12_FULL_44_12
2710264726	Omnitrophica WOR_2 bacterium RIFCSPHIGHO2_02_FULL_50_17
2710723616	Candidatus Daviesbacteria bacterium RIFCSPHIGHO2_12_FULL_37_11
2582580565	Composite genome from Lake Mendota Epilimnion pan-assembly MEint.metabat.3163
2785510833	candidate division Gribaldobacteria bacterium CG10_big_fil_rev_8_21_14_0_10_41_12
2785511183	Candidatus Nealsonbacteria bacterium CG23_combo_of_CG06-09_8_20_14_all_36_12
2710723724	Candidatus Yanofskybacteria bacterium RIFCSPLOWO2_01_FULL_42_49
2708742924	Candidatus Woesebacteria bacterium RIFCSPHIGHO2_01_FULL_38_10
2708743067	Candidatus Zambryskibacteria bacterium RIFCSPHIGHO2_01_FULL_43_60
2626542349	Parcubacteria bacterium GW2011_GWA1_49_11
2708742671	Bacteroidetes bacterium GWF2_43_63
2626542268	Parcubacteria (Nomurabacteria) bacterium GW2011_GWC2_36_9
2786546417	Candidatus Nomurabacteria bacterium CG_4_9_14_0_2_um_filter_32_10
2728369452	Candidatus Acetothermia bacterium JdFR-50
2710724074	Elusimicrobia bacterium RIFCSPLOWO2_02_FULL_39_32
2708742940	Candidatus Amesbacteria bacterium RIFCSPHIGHO2_01_FULL_48_75
2721755246	Bacteroidetes bacterium GWE2_40_63
2710723740	Candidatus Sungbacteria bacterium RIFCSPLOWO2_01_FULL_47_10
2713897377	Candidatus Jacksonbacteria bacterium RIFOXYB2_FULL_44_15
2634166229	Burkholderiales-129 (UID4000)
2708742637	Desulfuromonadales bacterium GWC2_61_20
2708742581	Bacteroidetes bacterium GWA2_40_15
2708742575	Candidatus Vogelbacteria bacterium GWA1_51_14
2711768565	Omnitrophica WOR_2 bacterium RIFOXYA2_FULL_38_17
2710723714	Candidatus Staskawiczbacteria bacterium RIFCSPLOWO2_01_FULL_38_12b
2785511249	Candidatus Falkowbacteria bacterium CG_4_10_14_0_2_um_filter_41_15
2708742914	Candidatus Sungbacteria bacterium RIFCSPHIGHO2_01_FULL_51_22
2711768435	Candidatus Rokubacteria bacterium RIFCSPLOWO2_12_FULL_69_21
2710264509	Deltaproteobacteria bacterium RIFCSPHIGHO2_02_FULL_40_11
2626541756	Parcubacteria (Nomurabacteria) bacterium GW2011_GWC2_42_20
2721755387	Chloroflexi bacterium RBG_16_68_14
2721755426	Planctomycetes bacterium RIFOXYD2_FULL_41_16
2708742557	Euryarchaeota archaeon RBG_16_67_27
2626541979	Parcubacteria (Wolfebacteria) bacterium GW2011_GWA2_42_10
2721755146	Desulfovibrionales bacterium GWA2_65_9
2711768227	Betaproteobacteria bacterium RIFCSPLOWO2_02_FULL_66_14
2786546371	Elusimicrobia bacterium CG08_land_8_20_14_0_20_59_10
2786546701	Hydrogenophilales bacterium CG_4_9_14_3_um_filter_59_35
2708742761	Chloroflexi bacterium RBG_16_64_32
2786546273	Candidatus Peregrinibacteria bacterium CG_4_9_14_3_um_filter_49_12
2786546327	Candidatus Roizmanbacteria bacterium CG_4_9_14_3_um_filter_36_11
2786546661	Deltaproteobacteria bacterium CG_4_10_14_0_2_um_filter_43_8
2710264706	Candidatus Lloydbacteria bacterium RIFCSPHIGHO2_02_FULL_51_22
2713897396	Elusimicrobia bacterium RIFOXYB2_FULL_50_12
2728369444	Deferribacteres bacterium JdFR-76
2582580711	Composite genome from Trout Bog Hypolimnion pan-assembly TBhypo.metabat.944
2785510831	Parcubacteria bacterium CG10_big_fil_rev_8_21_14_0_10_41_35
2626541945	Parcubacteria (Uhrbacteria) bacterium GW2011_GWA2_41_10
2711768271	Candidatus Doudnabacteria bacterium RIFCSPLOWO2_02_FULL_49_13
2785511083	Candidatus Berkelbacteria bacterium CG_4_10_14_0_8_um_filter_39_42
2626542271	Microgenomates (Woesebacteria) bacterium GW2011_GWA1_44_23
2654588079	miscellaneous Crenarchaeota group archaeon SMTZ1-55
2608642210	Rhodobacteraceae bacterium bin18
2786546320	candidate division WWE3 bacterium CG08_land_8_20_14_0_20_41_10
2785511181	Candidatus Nealsonbacteria bacterium CG11_big_fil_rev_8_21_14_0_20_39_9
2708742838	Chloroflexi bacterium RBG_19FT_COMBO_55_16
2785510813	candidate division Huberarchaea archaeon CG_4_10_14_0_8_um_filter_31_133
2582580701	Composite genome from Trout Bog Hypolimnion pan-assembly TBhypo.metabat.6070
2626542149	candidate division TM6 bacterium GW2011_GWE2_42_60
2608642200	Rhodobacteraceae bacterium bin08
2710723732	Candidatus Giovannonibacteria bacterium RIFCSPLOWO2_01_FULL_44_40
2710723867	Candidatus Gottesmanbacteria bacterium RIFCSPLOWO2_01_FULL_48_11
2708742755	Gammaproteobacteria bacterium RBG_16_51_14
2786546829	Flavobacteriales bacterium CG11_big_fil_rev_8_21_14_0_20_35_7
2626542049	Parcubacteria (Nomurabacteria) bacterium GW2011_GWA2_43_15
2786546230	Candidatus Uhrbacteria bacterium CG_4_10_14_0_2_um_filter_41_21
2785510884	Candidatus Desantisbacteria bacterium CG23_combo_of_CG06-09_8_20_14_all_40_23
2716884169	candidate division WWE3 bacterium RIFOXYD1_FULL_42_24
2711768217	Candidatus Curtissbacteria bacterium RIFCSPLOWO2_02_FULL_40_13b
2784132036	Fluviicola riflensis RIFCSPHIGHO2_02_FULL_43_260
2711768407	Candidatus Gottesmanbacteria bacterium RIFCSPLOWO2_12_FULL_42_10
2786546765	Gallionellales bacterium CG03_land_8_20_14_0_80_55_15
2710723979	Candidatus Curtissbacteria bacterium RIFCSPLOWO2_02_41_11
2791354782	Shewanella sp. CG18_big_fil_WC_8_21_14_2_50_42_11
2626541973	Parcubacteria bacterium GW2011_GWF2_42_7
2710723860	Candidatus Woykebacteria bacterium RIFCSPLOWO2_01_FULL_41_12
2710264709	Candidatus Adlerbacteria bacterium RIFCSPHIGHO2_02_FULL_54_18
2785510790	Candidatus Pacearchaeota archaeon CG10_big_fil_rev_8_21_14_0_10_32_42
2721755193	Elusimicrobia bacterium GWC2_51_8
2786546675	Alphaproteobacteria bacterium CG_4_9_14_3_um_filter_47_13
2716884155	Candidatus Wildermuthbacteria bacterium RIFOXYD1_FULL_50_12
2710723963	Candidatus Peregrinibacteria bacterium RIFCSPLOWO2_01_FULL_39_12
2716884161	Candidatus Brennerbacteria bacterium RIFOXYD1_FULL_41_16
2728369298	Candidatus Bathyarchaeota archaeon JdFR-08
2626541862	Microgenomates (Roizmanbacteria) bacterium GW2011_GWC1_37_12
2721755380	Candidatus Woesebacteria bacterium RBG_16_40_11
2626542186	candidate division TM6 bacterium GW2011_GWF2_37_49
2710723945	Candidatus Daviesbacteria bacterium RIFCSPLOWO2_01_FULL_38_10
2786546567	Anaerolineae bacterium CG03_land_8_20_14_0_80_58_20
2626542192	candidate division WWE3 bacterium GW2011_GWA1_43_94
2654588073	candidate division Zixibacteria bacterium SM23_81
2708742688	Lentisphaerae bacterium GWF2_52_8
2785511234	Candidatus Gracilibacteria bacterium CG12_big_fil_rev_8_21_14_0_65_38_15
2710723559	Candidatus Levybacteria bacterium RIFCSPHIGHO2_12_FULL_40_31
2791354780	Shewanella sp. CG_4_9_14_0_8_um_filter_42_14
2626541947	Parcubacteria (Yanofskybacteria) bacterium GW2011_GWA2_41_22
2788499807	Bacteroidetes bacterium CG_4_10_14_3_um_filter_31_20
2708742999	Candidatus Kaiserbacteria bacterium RIFCSPHIGHO2_01_FULL_51_33
2721755409	Betaproteobacteria bacterium RIFCSPLOWO2_12_FULL_66_14
2710264691	Candidatus Taylorbacteria bacterium RIFCSPHIGHO2_02_FULL_44_36
2626542197	Parcubacteria (Giovannonibacteria) bacterium GW2011_GWC2_44_9
2785510894	candidate division Moisslbacteria bacterium CG_4_10_14_0_2_um_filter_36_61
2708742835	Candidatus Woykebacteria bacterium RBG_19FT_COMBO_43_10
2626541860	Microgenomates bacterium GW2011_GWC1_33_28
2724678910	candidate division WWE3 bacterium RIFOXYD1_FULL_43_17
2710723767	Candidatus Woesebacteria bacterium RIFCSPLOWO2_01_FULL_39_61
2634166248	Burkholderiales-55 (UID4000)
2721755219	Spirochaetes bacterium GWD1_27_9
2711768273	Candidatus Zambryskibacteria bacterium RIFCSPLOWO2_02_FULL_51_21
2728369415	Desulfarculaceae bacterium JdFR-97
2785511314	Candidatus Moranbacteria bacterium CG_4_9_14_3_um_filter_40_7
2654587950	Gemmatimonas sp. SG8_23
2713897352	Candidatus Roizmanbacteria bacterium RIFOXYA2_FULL_38_14
2710723618	Candidatus Curtissbacteria bacterium RIFCSPHIGHO2_12_FULL_38_9b
2626542458	Microgenomates (Woesebacteria) bacterium GW2011_GWB1_43_14
2711768381	Gammaproteobacteria bacterium RIFCSPLOWO2_12_FULL_47_76
2785511034	Candidatus Colwellbacteria bacterium CG23_combo_of_CG06-09_8_20_14_all_42_19
2626541971	Parcubacteria (Giovannonibacteria) bacterium GW2011_GWF2_42_19
2710723619	Candidatus Roizmanbacteria bacterium RIFCSPHIGHO2_12_FULL_41_11
2710723988	Betaproteobacteria bacterium RIFCSPLOWO2_02_67_12
2785511242	Candidatus Wolfebacteria bacterium CG_4_9_14_3_um_filter_37_9
2785510929	candidate division Torokbacteria bacterium CG09_land_8_20_14_0_10_42_11
2721755191	Chloroflexi bacterium GWC2_49_37
2721755239	Burkholderiales bacterium GWE1_65_30
2626541818	Microgenomates (Woesebacteria) bacterium GW2011_GWB1_39_10b
2721755119	Gallionellales bacterium GWA2_54_124
2785510865	Parcubacteria bacterium CG07_land_8_20_14_0_80_35_11
2710264681	Candidatus Nomurabacteria bacterium RIFCSPHIGHO2_02_FULL_41_18
2626542086	Parcubacteria bacterium GW2011_GWA2_47_10b
2708742851	Chloroflexi bacterium RBG_19FT_COMBO_50_10
2654587944	Planctomycetes bacterium SM23_65
2708742692	Candidatus Moranbacteria bacterium RBG_13_45_13
2710723953	Candidatus Roizmanbacteria bacterium RIFCSPLOWO2_01_FULL_40_42
2711768388	Candidatus Sungbacteria bacterium RIFCSPLOWO2_12_FULL_41_11
2713897350	Candidatus Collierbacteria bacterium RIFOXYA2_FULL_46_20
2785510933	candidate division Gribaldobacteria bacterium CG_4_10_14_0_2_um_filter_33_15
2711768784	Gammaproteobacteria bacterium RIFOXYD12_FULL_61_37
2785511124	Candidatus Portnoybacteria bacterium CG_4_10_14_0_8_um_filter_40_50
2626541826	Candidatus Saccharibacteria bacterium GW2011_GWC2_48_9
2710723576	Candidatus Kerfeldbacteria bacterium RIFCSPHIGHO2_12_FULL_42_13
2785511214	Candidatus Nealsonbacteria bacterium CG10_big_fil_rev_8_21_14_0_10_40_24
2626541902	Microgenomates (Woesebacteria) bacterium GW2011_GWC1_42_9
2710264649	Omnitrophica WOR_2 bacterium RIFCSPHIGHO2_02_FULL_48_11
2713897344	Elusimicrobia bacterium RIFCSPHIGHO2_02_FULL_57_9
2582580589	Composite genome from Lake Mendota Epilimnion pan-assembly MEint.metabat.5999
2708742825	Candidatus Eisenbacteria bacterium RBG_19FT_COMBO_70_11
2708742586	Elusimicrobia bacterium GWA2_64_40
2721755331	Chloroflexi bacterium RBG_13_51_18
2785511240	Candidatus Wolfebacteria bacterium CG03_land_8_20_14_0_80_36_15
2785511024	Candidatus Shapirobacteria bacterium CG07_land_8_20_14_0_80_39_12
2708742987	Parcubacteria group bacterium RIFCSPHIGHO2_01_FULL_45_26
2711768492	Bdellovibrionales bacterium RIFOXYA1_FULL_36_14
2785511042	Candidatus Aenigmarchaeota archaeon CG15_BIG_FIL_POST_REV_8_21_14_020_37_27
2785511204	Candidatus Nealsonbacteria bacterium CG08_land_8_20_14_0_20_36_22
2721755284	Gammaproteobacteria bacterium GWF2_41_13
2626541920	Microgenomates (Amesbacteria) bacterium GW2011_GWC1_47_15
2785511332	Candidatus Moranbacteria bacterium CG23_combo_of_CG06-09_8_20_14_all_35_22
2785511291	Candidatus Collierbacteria bacterium CG17_big_fil_post_rev_8_21_14_2_50_45_7
2785511114	Candidatus Portnoybacteria bacterium CG_4_9_14_3_um_filter_44_9
2721755139	Candidatus Firestonebacteria bacterium GWA2_43_8
2648501564	Actinobacteria FNED7-bin-55
2708742919	Candidatus Liptonbacteria bacterium RIFCSPHIGHO2_01_FULL_56_18b
2710723935	Candidatus Uhrbacteria bacterium RIFCSPLOWO2_01_FULL_53_9
2708743014	Candidatus Levybacteria bacterium RIFCSPHIGHO2_01_FULL_40_10
2708742690	Nitrospirae bacterium GWF2_44_13
2654587957	Gammaproteobacteria bacterium SG8_15
2710264518	Deltaproteobacteria bacterium RIFCSPHIGHO2_02_FULL_50_15
2721755309	Candidatus Buchananbacteria bacterium RBG_13_39_9
2786546237	Candidatus Kaiserbacteria bacterium CG10_big_fil_rev_8_21_14_0_10_56_12
2785511014	Candidatus Yonathbacteria bacterium CG_4_8_14_3_um_filter_46_25
2716884107	candidate division WWE3 bacterium RIFOXYC2_FULL_40_11
2708742815	Deltaproteobacteria bacterium RBG_19FT_COMBO_56_10
2626541816	Microgenomates (Woesebacteria) bacterium GW2011_GWB1_38_8b
2710264684	Candidatus Falkowbacteria bacterium RIFCSPHIGHO2_02_FULL_42_9
2710264595	Ignavibacteria bacterium RIFCSPHIGHO2_02_FULL_56_12
2708742956	Candidatus Ryanbacteria bacterium RIFCSPHIGHO2_01_FULL_44_130
2713897424	Candidatus Staskawiczbacteria bacterium RIFOXYC2_FULL_37_17
2785511040	Candidatus Aenigmarchaeota archaeon CG_4_8_14_3_um_filter_37_24
2785511004	Candidatus Harrisonbacteria bacterium CG10_big_fil_rev_8_21_14_0_10_38_8
2711768490	candidate division WWE3 bacterium RIFOXYA1_FULL_41_11
2786546388	Nitrospirae bacterium CG_4_9_14_3_um_filter_53_35
2721755356	Chloroflexi bacterium RBG_13_46_14
2710723608	Candidatus Taylorbacteria bacterium RIFCSPHIGHO2_12_FULL_42_34
2626541906	Microgenomates bacterium GW2011_GWC1_43_13
2582580560	Composite genome from Lake Mendota Epilimnion pan-assembly MEint.metabat.3061
2708742805	Actinobacteria bacterium RBG_16_67_15
2711768481	Paenibacillus sp. RIFOXYA1_FULL_44_5
2626541729	Microgenomates (Daviesbacteria) bacterium GW2011_GWA2_42_7
2710723756	Candidatus Kaiserbacteria bacterium RIFCSPLOWO2_01_FULL_55_19
2626542358	Parcubacteria bacterium GW2011_GWA2_33_14
2700988737	Candidatus Peribacter riflensis RIFOXYD2_FULL_PER-ii_51_23 Ga0137951
2626541937	Parcubacteria (Magasanikbacteria) bacterium GW2011_GWA2_40_10
2711768467	Nitrospinae bacterium RIFCSPLOWO2_12_FULL_47_7
2785511322	Candidatus Moranbacteria bacterium CG10_big_fil_rev_8_21_14_0_10_35_21
2711768763	Candidatus Lloydbacteria bacterium RIFOXYC12_FULL_46_25
2708743085	Candidatus Sungbacteria bacterium RIFCSPHIGHO2_01_FULL_50_25
2708742886	Candidatus Lloydbacteria bacterium RIFCSPHIGHO2_01_FULL_41_20
2626541910	Parcubacteria (Moranbacteria) bacterium GW2011_GWF1_44_4
2711768795	Chloroflexi bacterium RIFOXYD12_FULL_57_15
2786546407	Nitrospirae bacterium CG18_big_fil_WC_8_21_14_2_50_70_55
2626542097	Parcubacteria (Nomurabacteria) bacterium GW2011_GWB1_43_19
2785510794	Candidatus Pacearchaeota archaeon CG10_big_fil_rev_8_21_14_0_10_34_12
2711768394	Candidatus Giovannonibacteria bacterium RIFCSPLOWO2_12_FULL_44_25
2710264559	Candidatus Kaiserbacteria bacterium RIFCSPHIGHO2_02_FULL_55_25
2711768297	Candidatus Uhrbacteria bacterium RIFCSPLOWO2_02_FULL_54_37
2710264543	Candidatus Wildermuthbacteria bacterium RIFCSPHIGHO2_02_FULL_45_25
2721755209	Chloroflexi bacterium GWC2_70_10
2710723925	Candidatus Zambryskibacteria bacterium RIFCSPLOWO2_01_FULL_47_33
2711768307	Sulfurimonas sp. RIFCSPLOWO2_12_36_12
2716884145	Syntrophus sp. RIFOXYC2_FULL_54_9
2785511312	Candidatus Zambryskibacteria bacterium CG_4_9_14_3_um_filter_42_15
2713897404	Elusimicrobia bacterium RIFOXYB2_FULL_46_23
2710723986	Candidatus Terrybacteria bacterium RIFCSPLOWO2_02_42_20
2654587934	Anaerolineae bacterium SM23_84
2710723609	Candidatus Zambryskibacteria bacterium RIFCSPHIGHO2_12_FULL_43_12b
2626542032	Parcubacteria (Magasanikbacteria) bacterium GW2011_GWA2_46_17
2582580647	Composite genome from Trout Bog Epilimnion pan-assembly TBepi.metabat.8052
2710264508	Gammaproteobacteria bacterium RIFCSPHIGHO2_02_FULL_38_33
2785511320	Candidatus Moranbacteria bacterium CG_4_9_14_3_um_filter_44_28
2711768288	Deltaproteobacteria bacterium RIFCSPLOWO2_02_FULL_53_8
2785511203	Candidatus Nealsonbacteria bacterium CG08_land_8_20_14_0_20_38_20
2785511032	Candidatus Colwellbacteria bacterium CG10_big_fil_rev_8_21_14_0_10_42_22
2785511302	Candidatus Gottesmanbacteria bacterium CG_4_10_14_0_8_um_filter_37_24
2711768240	Elusimicrobia bacterium RIFCSPLOWO2_02_FULL_61_11
2626542411	Microgenomates (Curtissbacteria) bacterium GW2011_GWA1_40_16
2721755109	Planctomycetes bacterium GWA2_39_15
2710723646	Candidatus Levybacteria bacterium RIFCSPHIGHO2_12_FULL_37_12
2626542469	Microgenomates bacterium GW2011_GWB1_46_7
2786546589	Zetaproteobacteria bacterium CG_4_10_14_3_um_filter_54_28
2710724049	Candidatus Roizmanbacteria bacterium RIFCSPLOWO2_02_FULL_41_9
2710723883	Candidatus Terrybacteria bacterium RIFCSPLOWO2_01_FULL_44_24
2711768673	candidate division WWE3 bacterium RIFOXYB1_FULL_43_12
2785511222	Candidatus Nealsonbacteria bacterium CG02_land_8_20_14_3_00_37_10
2582580506	AP Idiomarina sp. HL-53 first draft
2710264648	Candidatus Collierbacteria bacterium RIFCSPHIGHO2_02_FULL_49_10
2710723915	Candidatus Yanofskybacteria bacterium RIFCSPLOWO2_01_FULL_44_88
2785511310	Candidatus Zambryskibacteria bacterium CG10_big_fil_rev_8_21_14_0_10_34_34
2710724045	Candidatus Levybacteria bacterium RIFCSPLOWO2_02_FULL_39_26
2728369338	Aciduliprofundum sp. JdFR-44
2654587942	Phycisphaerae bacterium SM23_33
2626542455	Microgenomates (Levybacteria) bacterium GW2011_GWB1_41_21
2785511122	Candidatus Portnoybacteria bacterium CG_4_8_14_3_um_filter_44_10
2785511212	Candidatus Ryanbacteria bacterium CG10_big_fil_rev_8_21_14_0_10_43_42
2785511300	Candidatus Taylorbacteria bacterium CG11_big_fil_rev_8_21_14_0_20_46_11
2786546394	Nitrospirae bacterium CG_4_9_14_3_um_filter_44_28
2713897357	Gallionellales bacterium RIFOXYB12_FULL_54_9
2710723905	Candidatus Roizmanbacteria bacterium RIFCSPLOWO2_01_FULL_42_14
2710723656	Chlamydiae bacterium RIFCSPHIGHO2_12_FULL_27_8
2626542158	Parcubacteria bacterium GW2011_GWC1_44_26
2713897342	Nitrospirae bacterium RIFCSPHIGHO2_02_FULL_40_19
2785511220	Candidatus Nealsonbacteria bacterium CG_4_9_14_0_8_um_filter_36_17
2785511022	Candidatus Shapirobacteria bacterium CG11_big_fil_rev_8_21_14_0_20_40_12
2785511202	Candidatus Nealsonbacteria bacterium CG08_land_8_20_14_0_20_43_11
2785511112	Candidatus Portnoybacteria bacterium CG10_big_fil_rev_8_21_14_0_10_40_22
2786546647	Deltaproteobacteria bacterium CG17_big_fil_post_rev_8_21_14_2_50_63_7
2626542058	candidate division WS6 bacterium GW2011_GWA2_37_6
2786546288	Candidatus Levybacteria bacterium CG_4_9_14_3_um_filter_35_16
2708743132	Nitrospinae bacterium RIFCSPHIGHO2_02_39_11
2721755256	Omnitrophica WOR_2 bacterium GWF2_38_59
2626542401	Microgenomates (Woesebacteria) bacterium GW2011_GWA1_37_7
2785511120	Candidatus Portnoybacteria bacterium CG10_big_fil_rev_8_21_14_0_10_36_7
2626541787	Parcubacteria (Uhrbacteria) bacterium GW2011_GWF2_41_40
2785511012	Candidatus Yonathbacteria bacterium CG_4_10_14_0_8_um_filter_47_645
2785511102	Candidatus Portnoybacteria bacterium CG11_big_fil_rev_8_21_14_0_20_40_15
2626541877	Peregrinibacteria bacterium GW2011_GWF2_39_17
2708742773	Candidatus Glassbacteria bacterium RBG_16_58_8
2710723580	Candidatus Harrisonbacteria bacterium RIFCSPHIGHO2_12_FULL_48_16
2728369418	Nitrospirae bacterium JdFR-82
2710264695	Candidatus Taylorbacteria bacterium RIFCSPHIGHO2_02_FULL_45_35
2713897340	Elusimicrobia bacterium RIFCSPHIGHO2_02_FULL_61_10
2711768755	Burkholderiales bacterium RIFOXYC12_FULL_65_23
2785511020	Candidatus Yonathbacteria bacterium CG_4_9_14_0_2_um_filter_47_74
2786546655	Deltaproteobacteria bacterium CG_4_9_14_0_2_um_filter_42_21
2786546763	Gallionellales bacterium CG_4_8_14_3_um_filter_54_18
2716884135	Candidatus Falkowbacteria bacterium RIFOXYC2_FULL_36_12
2708742876	Nitrospirae bacterium RIFCSPHIGHO2_01_FULL_66_17
2710723881	candidate division WWE3 bacterium RIFCSPLOWO2_01_FULL_41_18
2786546317	candidate division WWE3 bacterium CG_4_9_14_0_2_um_filter_48_10
2708742745	Candidatus Muproteobacteria bacterium RBG_16_60_9
2708743032	Alphaproteobacteria bacterium RIFCSPHIGHO2_01_FULL_40_8
2708742841	Actinobacteria bacterium RBG_19FT_COMBO_70_19
2716884153	Candidatus Nealsonbacteria bacterium RIFOXYD1_FULL_39_11
2626542484	Microgenomates (Levybacteria) bacterium GW2011_GWC2_40_7
2710723674	Candidatus Roizmanbacteria bacterium RIFCSPHIGHO2_12_FULL_37_9b
2711768579	Candidatus Falkowbacteria bacterium RIFOXYA2_FULL_38_12
2785511010	Candidatus Yonathbacteria bacterium CG17_big_fil_post_rev_8_21_14_2_50_43_9
2634166228	Opitutae-129 (UID2982)
2634166268	Bacteriovora-8x (UID3187)
2724678937	Sulfuricurvum sp. RIFOXYD2_FULL_44_160
2708742964	Candidatus Zambryskibacteria bacterium RIFCSPHIGHO2_01_FULL_35_32
2713897412	Candidatus Peregrinibacteria bacterium RIFOXYB2_FULL_41_88
2648501560	TM7 FNED7-bin-18
2626542369	Parcubacteria (Moranbacteria) bacterium GW2011_GWA2_39_41
2582580671	Composite genome from Trout Bog Hypolimnion pan-assembly TBhypo.metabat.3219
2785511000	Candidatus Campbellbacteria bacterium CG10_big_fil_rev_8_21_14_0_10_35_52
2582580575	Composite genome from Lake Mendota Epilimnion pan-assembly MEint.metabat.4252
2713897420	Pseudomonadales bacterium GWC2_63_15
2713897402	Omnitrophica WOR_2 bacterium RIFOXYB2_FULL_45_11
2721755374	Spirochaetes bacterium RBG_13_51_14
2708742833	Deltaproteobacteria bacterium RBG_19FT_COMBO_60_16
2710723699	Candidatus Woesebacteria bacterium RIFCSPLOWO2_01_FULL_39_25
2582580637	Composite genome from Trout Bog Epilimnion pan-assembly TBepi.metabat.4548
2710264568	Candidatus Daviesbacteria bacterium RIFCSPHIGHO2_02_FULL_40_16
2582580557	Composite genome from Lake Mendota Epilimnion pan-assembly MEint.metabat.2898
2711768392	Candidatus Nomurabacteria bacterium RIFCSPLOWO2_12_FULL_44_11
2708742868	Candidatus Woesebacteria bacterium RIFCSPHIGHO2_01_FULL_44_10
2626542202	Parcubacteria (Wolfebacteria) bacterium GW2011_GWC2_46_275
2721755129	Elusimicrobia bacterium GWA2_38_7
2710723764	Candidatus Levybacteria bacterium RIFCSPLOWO2_01_FULL_38_23
2654587932	Acidithiobacillales bacterium SM23_46
2710723744	Candidatus Taylorbacteria bacterium RIFCSPLOWO2_01_FULL_48_100
2710723704	Candidatus Kerfeldbacteria bacterium RIFCSPLOWO2_01_FULL_48_11
2785511009	Candidatus Yonathbacteria bacterium CG10_big_fil_rev_8_21_14_0_10_43_136
2716884125	Candidatus Falkowbacteria bacterium RIFOXYC2_FULL_46_15
2713897332	Candidatus Buchananbacteria bacterium RIFCSPHIGHO2_02_FULL_38_8
2627853504	Parcubacteria (Uhrbacteria) bacterium GW2011_GWE2_40_58
2710723877	Candidatus Roizmanbacteria bacterium RIFCSPLOWO2_01_FULL_35_13
2626541907	Microgenomates bacterium GW2011_GWC1_44_10
2786546563	Anaerolineae bacterium CG_4_8_14_3_um_filter_59_70
2711768294	candidate division WWE3 bacterium RIFCSPLOWO2_02_FULL_53_10
2713897410	Candidatus Wolfebacteria bacterium RIFOXYB2_FULL_49_7
2786546188	Candidatus Portnoybacteria bacterium CG08_land_8_20_14_0_20_40_83
2786546400	Nitrospirae bacterium CG_4_8_14_3_um_filter_44_28
2711768267	Candidatus Uhrbacteria bacterium RIFCSPLOWO2_02_FULL_46_25
2708742771	Chloroflexi bacterium RBG_16_57_9
2710723968	Candidatus Doudnabacteria bacterium RIFCSPLOWO2_01_41_7
2713897400	Candidatus Uhrbacteria bacterium RIFOXYB2_FULL_45_11
2786546761	Gallionellales bacterium CG_4_9_14_0_8_um_filter_59_50
2626541838	Parcubacteria (Yanofskybacteria) bacterium GW2011_GWD2_39_48
2711768557	Deltaproteobacteria bacterium RIFOXYA2_FULL_42_10
2785510974	Candidatus Vogelbacteria bacterium CG10_big_fil_rev_8_21_14_0_10_50_13
2716884151	Bdellovibrionales bacterium RIFOXYD1_FULL_39_84
2716884115	Candidatus Kerfeldbacteria bacterium RIFOXYC2_FULL_38_9
2716884179	Candidatus Veblenbacteria bacterium RIFOXYD1_FULL_43_11
2721755298	Candidatus Aminicenantes bacterium RBG_13_63_10
2654587930	Chlamydiae bacterium SM23_39
2786546307	candidate division WWE3 bacterium CG_4_9_14_3_um_filter_41_6
2711768390	Candidatus Yanofskybacteria bacterium RIFCSPLOWO2_12_FULL_43_11b
2708742946	Candidatus Saccharibacteria bacterium RIFCSPHIGHO2_01_FULL_49_21
2710723941	Candidatus Levybacteria bacterium RIFCSPLOWO2_01_FULL_36_13
2626542269	Microgenomates (Woesebacteria) bacterium GW2011_GWA1_43_12
2710723746	Candidatus Wildermuthbacteria bacterium RIFCSPLOWO2_01_FULL_48_29
2713897330	Candidatus Pacebacteria bacterium RIFCSPHIGHO2_02_FULL_46_9
2786546828	Flavobacteriales bacterium CG_4_9_14_3_um_filter_32_8
2711768759	Candidatus Staskawiczbacteria bacterium RIFOXYC12_FULL_39_20
2708742823	Candidatus Woesebacteria bacterium RBG_19FT_COMBO_47_8
2716884105	Candidatus Peregrinibacteria bacterium RIFOXYC2_FULL_41_22
2788500163	Flavobacteriaceae bacterium CG_4_10_14_3_um_filter_31_253
2708742737	Deltaproteobacteria bacterium RBG_16_55_12
2728369456	Dehalococcoides sp. JdFR-58
2626541983	Parcubacteria bacterium GW2011_GWA2_42_18
2786546392	Nitrospirae bacterium CG_4_9_14_0_8_um_filter_70_14
2708742831	Planctomycetes bacterium RBG_19FT_COMBO_48_8
2711768489	Candidatus Peribacteria bacterium RIFOXYA1_FULL_56_14
2708742733	Alphaproteobacteria bacterium RBG_16_42_14
2791354759	Sulfurimonas sp. CG_4_9_14_0_8_um_filter_36_384
2721755274	Elusimicrobia bacterium GWF2_52_66
2785511264	Candidatus Falkowbacteria bacterium CG_4_10_14_0_8_um_filter_41_36
2786546294	Candidatus Levybacteria bacterium CG_4_10_14_0_2_um_filter_35_8
2582580627	Composite genome from Trout Bog Epilimnion pan-assembly TBepi.metabat.2754
2708742813	Candidatus Dadabacteria bacterium RBG_19FT_COMBO_40_33
2710723598	Gammaproteobacteria bacterium RIFCSPHIGHO2_12_FULL_38_11
2626542169	Parcubacteria bacterium GW2011_GWB1_44_7
2710724039	Candidatus Lloydbacteria bacterium RIFCSPLOWO2_02_FULL_54_12
2626542263	Parcubacteria bacterium GW2011_GWC1_51_35
2708742594	Deltaproteobacteria bacterium GWA2_42_85
2728369299	Candidatus Bathyarchaeota archaeon JdFR-07
2708742803	Actinobacteria bacterium RBG_16_64_13
2626541852	Microgenomates (Woesebacteria) bacterium GW2011_GWB1_40_101
2596583566	Bacteroidetes bacterium FNE-F8 bin_25_2_bact
2785511046	Candidatus Shapirobacteria bacterium CG_4_8_14_3_um_filter_39_11
2708743102	Candidatus Woykebacteria bacterium RIFCSPHIGHO2_01_FULL_39_12
2654588065	Parcubacteria bacterium DG_72
2626541709	Parcubacteria (Falkowbacteria) bacterium GW2011_GWC2_38_22
2786546390	Nitrospirae bacterium CG02_land_8_20_14_3_00_41_53
2710724095	Candidatus Colwellbacteria bacterium RIFCSPLOWO2_02_FULL_45_11
2626542069	Parcubacteria bacterium GW2011_GWA2_48_9
2710723519	Candidatus Zambryskibacteria bacterium RIFCSPHIGHO2_12_FULL_38_34
2626542384	candidate division WWE3 bacterium GW2011_GWD2_42_34
2708742821	Armatimonadetes bacterium RBG_19FT_COMBO_69_19
2626542482	Microgenomates (Daviesbacteria) bacterium GW2011_GWC2_40_12
2708742588	Elusimicrobia bacterium GWA2_61_42
2710723672	Candidatus Kaiserbacteria bacterium RIFCSPHIGHO2_12_FULL_55_13
2634166259	Bacteroidetes-76 (UID2591)
2721755174	Spirochaetes bacterium GWC1_27_15
2708742962	Fluviicola sp. RIFCSPHIGHO2_01_FULL_43_53
2708742853	Chloroflexi bacterium RBG_19FT_COMBO_49_13
2710264593	Deltaproteobacteria bacterium RIFCSPHIGHO2_02_FULL_60_17
2626541850	Parcubacteria bacterium GW2011_GWE2_43_12
2582580617	Composite genome from Trout Bog Epilimnion pan-assembly TBepi.metabat.149
2710723923	Candidatus Uhrbacteria bacterium RIFCSPLOWO2_01_FULL_47_17
2626542438	Microgenomates (Roizmanbacteria) bacterium GW2011_GWA2_32_13
2788500161	Flavobacteriaceae bacterium CG_4_10_14_0_8_um_filter_34_31
2713897367	Sideroxydans sp. RIFOXYB12_FULL_59_6
2626542361	Parcubacteria bacterium GW2011_GWA2_36_24
2708742727	Candidatus Eisenbacteria bacterium RBG_16_71_46
2711768488	Candidatus Woesebacteria bacterium RIFOXYA1_FULL_48_16
2608642187	Marinobacter sp HL-58
2708742811	candidate division WWE3 bacterium RBG_19FT_COMBO_34_6
2716884143	Planctomycetes bacterium RIFOXYC2_FULL_41_27
2721755372	Candidatus Portnoybacteria bacterium RBG_13_41_18
2785510878	Candidatus Desantisbacteria bacterium CG_4_8_14_3_um_filter_40_12
2710264698	Candidatus Wildermuthbacteria bacterium RIFCSPHIGHO2_02_FULL_47_17
2710264638	Candidatus Daviesbacteria bacterium RIFCSPHIGHO2_02_FULL_37_9
2708743083	Candidatus Lloydbacteria bacterium RIFCSPHIGHO2_01_FULL_49_22
2710723931	Candidatus Wildermuthbacteria bacterium RIFCSPLOWO2_01_FULL_50_46
2626542148	candidate division TM6 bacterium GW2011_GWE2_41_16
2721755366	Planctomycetes bacterium RBG_13_50_24
2711768738	Candidatus Lambdaproteobacteria bacterium RIFOXYC1_FULL_56_13
2710723762	Candidatus Roizmanbacteria bacterium RIFCSPLOWO2_01_FULL_38_11
2710264682	Candidatus Nomurabacteria bacterium RIFCSPHIGHO2_02_FULL_41_52
2710264629	Candidatus Magasanikbacteria bacterium RIFCSPHIGHO2_02_FULL_51_14
2626541844	Parcubacteria (Moranbacteria) bacterium GW2011_GWE2_35_164
2708742801	Planctomycetes bacterium RBG_16_59_8
2626542163	Parcubacteria (Azambacteria) bacterium GW2011_GWC1_46_13
2710723736	Candidatus Giovannonibacteria bacterium RIFCSPLOWO2_01_FULL_45_34
2710723670	Candidatus Kerfeldbacteria bacterium RIFCSPHIGHO2_12_FULL_48_17
2711768745	Candidatus Giovannonibacteria bacterium RIFOXYC1_FULL_48_8
2708742936	Candidatus Levybacteria bacterium RIFCSPHIGHO2_01_FULL_42_15
2626542017	Berkelbacteria bacterium GW2011_GWA1_36_9
2708742960	Candidatus Doudnabacteria bacterium RIFCSPHIGHO2_01_FULL_50_11
2626542048	Parcubacteria bacterium GW2011_GWA2_43_13
2711768292	Candidatus Taylorbacteria bacterium RIFCSPLOWO2_02_FULL_48_16
2626541759	Parcubacteria (Azambacteria) bacterium GW2011_GWC2_43_27
2710723666	Candidatus Yanofskybacteria bacterium RIFCSPHIGHO2_12_FULL_44_29b
2710723903	Candidatus Yanofskybacteria bacterium RIFCSPLOWO2_01_FULL_41_33
2626541774	Microgenomates bacterium GW2011_GWA2_47_8
2721755198	Candidatus Rokubacteria bacterium GWC2_70_16
2582580554	Composite genome from Lake Mendota Epilimnion pan-assembly MEint.metabat.2729
2721755370	Candidatus Woykebacteria bacterium RBG_13_40_15
2785510972	Candidatus Vogelbacteria bacterium CG10_big_fil_rev_8_21_14_0_10_49_38
2708743127	Candidatus Doudnabacteria bacterium RIFCSPHIGHO2_01_43_10
2710723760	Candidatus Roizmanbacteria bacterium RIFCSPLOWO2_01_FULL_37_12
2708743010	Candidatus Daviesbacteria bacterium RIFCSPHIGHO2_01_FULL_38_8b
2710723921	Candidatus Giovannonibacteria bacterium RIFCSPLOWO2_01_FULL_46_13
2626541965	Parcubacteria bacterium GW2011_GWF2_39_13b
2788499940	Gallionellaceae bacterium CG02_land_8_20_14_3_00_60_115
2711768465	Acidobacteria bacterium RIFCSPLOWO2_12_FULL_60_22
2582580533	Composite genome from Lake Mendota Epilimnion pan-assembly MEint.metabat.15216
2711768290	Sulfurimonas sp. RIFCSPLOWO2_02_FULL_36_28
2721755266	Candidatus Delongbacteria bacterium GWF2_40_14
2708742665	Sphingomonadales bacterium GWF1_63_6
2626542284	Parcubacteria (Moranbacteria) bacterium GW2011_GWE1_35_17
2582580547	Composite genome from Lake Mendota Epilimnion pan-assembly MEint.metabat.20494
2710723726	Candidatus Zambryskibacteria bacterium RIFCSPLOWO2_01_FULL_43_17
2626541739	Parcubacteria (Azambacteria) bacterium GW2011_GWF1_41_10
2626542338	Parcubacteria bacterium GW2011_GWA1_45_7
2708742926	Candidatus Daviesbacteria bacterium RIFCSPHIGHO2_01_FULL_38_8
2711768389	Candidatus Jorgensenbacteria bacterium RIFCSPLOWO2_12_FULL_42_11
2785511148	Candidatus Woesearchaeota archaeon CG10_big_fil_rev_8_21_14_0_10_45_5
2785510897	Parcubacteria bacterium CG10_big_fil_rev_8_21_14_0_10_35_15
2786546592	Zetaproteobacteria bacterium CG11_big_fil_rev_8_21_14_0_20_59_439
2716884133	candidate division CPR3 bacterium RIFOXYC2_FULL_35_7
2626542428	Microgenomates bacterium GW2011_GWA1_46_15
2626541898	Microgenomates bacterium GW2011_GWC1_40_35
2710723901	Candidatus Staskawiczbacteria bacterium RIFCSPLOWO2_01_FULL_40_39
2710723509	Planctomycetes bacterium RIFCSPHIGHO2_12_39_6
2708742592	Deltaproteobacteria bacterium GWA2_55_10
2711768753	candidate division WWE3 bacterium RIFOXYC1_FULL_40_10
2711768457	Candidatus Levybacteria bacterium RIFCSPLOWO2_12_FULL_41_12
2710724029	Candidatus Falkowbacteria bacterium RIFCSPLOWO2_02_FULL_45_21
2711768676	Candidatus Shapirobacteria bacterium RIFOXYB1_FULL_38_38
2711768475	Candidatus Pacebacteria bacterium RIFOXYA1_FULL_38_18
2724678917	Candidatus Falkowbacteria bacterium RIFOXYD2_FULL_34_120
2708742738	Ignavibacteria bacterium RBG_16_35_7
2721755166	Deltaproteobacteria bacterium GWB2_55_19
2788500435	Bdellovibrio sp. CG10_big_fil_rev_8_21_14_0_10_47_8
2710264680	Candidatus Sungbacteria bacterium RIFCSPHIGHO2_02_FULL_41_12b
2721755270	Lentisphaerae bacterium GWF2_44_16
2626541834	candidate division WS6 bacterium GW2011_GWD1_35_594
2710723716	Candidatus Yanofskybacteria bacterium RIFCSPLOWO2_01_FULL_39_28
2626542365	Parcubacteria (OD1-vii) bacterium GW2011_GWA2_38_13b
2708742689	Candidatus Rokubacteria bacterium GWF2_70_14
2728369446	Candidatus Hydrothermae bacterium JdFR-71
2708742916	Candidatus Kaiserbacteria bacterium RIFCSPHIGHO2_01_FULL_53_31
2711768735	Candidatus Levybacteria bacterium RIFOXYC1_FULL_40_10
2786546290	Candidatus Levybacteria bacterium CG_4_10_14_0_8_um_filter_35_23
2626542238	Microgenomates (Gottesmanbacteria) bacterium GW2011_GWA1_43_11
2721755172	Ignavibacteria bacterium GWB2_35_6b
2785510966	Candidatus Kuenenbacteria bacterium CG23_combo_of_CG06-09_8_20_14_all_36_9
2708742590	Elusimicrobia bacterium GWA2_66_18
2716884123	Candidatus Falkowbacteria bacterium RIFOXYC2_FULL_34_220
2721755399	Deltaproteobacteria bacterium RBG_16_42_7
2716884168	Bdellovibrionales bacterium RIFOXYD1_FULL_36_51
2582580573	Composite genome from Lake Mendota Epilimnion pan-assembly MEint.metabat.3880
2716884102	Candidatus Jacksonbacteria bacterium RIFOXYC2_FULL_44_29
2582580679	Composite genome from Trout Bog Hypolimnion pan-assembly TBhypo.metabat.3772
2710723706	Candidatus Chisholmbacteria bacterium RIFCSPLOWO2_01_FULL_50_28
2786546389	Nitrospirae bacterium CG02_land_8_20_14_3_00_44_33
2708742906	Candidatus Doudnabacteria bacterium RIFCSPHIGHO2_01_FULL_48_180
2710264619	Candidatus Ryanbacteria bacterium RIFCSPHIGHO2_02_FULL_45_43
2710723976	Candidatus Nomurabacteria bacterium RIFCSPLOWO2_02_40_28
2626542445	Microgenomates (Roizmanbacteria) bacterium GW2011_GWA2_36_23
2626542184	candidate division TM6 bacterium GW2011_GWF2_36_131
2786546605	Zetaproteobacteria bacterium CG03_land_8_20_14_0_80_59_51
2627853502	Parcubacteria bacterium GW2011_GWC2_45_7
2716884131	Elusimicrobia bacterium RIFOXYC2_FULL_34_12
2716884113	Candidatus Nomurabacteria bacterium RIFOXYC2_FULL_36_19
2710724059	Acidobacteria bacterium RIFCSPLOWO2_02_FULL_67_36
2786546457	Candidatus Omnitrophica bacterium CG_4_9_14_0_2_um_filter_42_8
2626542038	Parcubacteria bacterium GW2011_GWA2_47_9
2721755170	Bacteroidetes bacterium GWB2_41_8
2615840622	uncultured Firmicutes Ga0071115
2711768751	Candidatus Roizmanbacteria bacterium RIFOXYC1_FULL_38_14
2785511002	Candidatus Campbellbacteria bacterium CG22_combo_CG10-13_8_21_14_all_36_13
2626541824	Parcubacteria bacterium GW2011_GWF2_45_11
2654588078	miscellaneous Crenarchaeota group archaeon SMTZ-80
2716884103	Candidatus Roizmanbacteria bacterium RIFOXYC2_FULL_38_9
2626542418	Microgenomates (Roizmanbacteria) bacterium GW2011_GWA1_41_13
2626542279	Microgenomates (Levybacteria) bacterium GW2011_GWA2_40_16
2626541772	Microgenomates (Beckwithbacteria) bacterium GW2011_GWA2_47_25
2786546547	Hadesarchaea archaeon CG08_land_8_20_14_0_20_51_8
2788500045	Piscirickettsiaceae bacterium CG07_land_8_20_14_0_80_44_28
2582580567	Composite genome from Lake Mendota Epilimnion pan-assembly MEint.metabat.33807
2626541840	Parcubacteria (Wolfebacteria) bacterium GW2011_GWE1_48_7
2710724084	Parcubacteria group bacterium RIFCSPLOWO2_02_FULL_40_12
2711768289	Pseudomonadales bacterium RIFCSPLOWO2_02_FULL_63_210
2711768742	Candidatus Liptonbacteria bacterium RIFOXYC1_FULL_36_8
2626541780	Parcubacteria bacterium GW2011_GWF2_38_8
2626541814	Microgenomates (Woesebacteria) bacterium GW2011_GWB1_38_5b
2634166222	Acidovorax-123 (UID4000)
2582580537	Composite genome from Lake Mendota Epilimnion pan-assembly MEint.metabat.1627
2710723730	Candidatus Giovannonibacteria bacterium RIFCSPLOWO2_01_FULL_44_16
2708743096	Candidatus Daviesbacteria bacterium RIFCSPHIGHO2_01_FULL_36_37
2711768357	Planctomycetes bacterium RIFCSPLOWO2_12_FULL_50_35
2728369412	Candidatus Acetothermia bacterium JdFR-49
2626541804	Parcubacteria (Moranbacteria) bacterium GW2011_GWD2_37_9
2626541770	Microgenomates (Amesbacteria) bacterium GW2011_GWA2_47_11
2710264716	Candidatus Gottesmanbacteria bacterium RIFCSPHIGHO2_02_FULL_39_11
2710264511	Omnitrophica bacterium RIFCSPHIGHO2_02_FULL_45_28
2626541798	Parcubacteria (Nomurabacteria) bacterium GW2011_GWD1_44_10
2626542084	Parcubacteria bacterium GW2011_GWA2_44_12
2710264539	Candidatus Jacksonbacteria bacterium RIFCSPHIGHO2_02_FULL_44_25
2651869518	Betaproteobacteria FNEB7 bin_39
2710723574	Candidatus Spechtbacteria bacterium RIFCSPHIGHO2_12_FULL_38_30
2716884111	Candidatus Peribacteria bacterium RIFOXYC2_FULL_55_14
2626542459	Microgenomates (Woesebacteria) bacterium GW2011_GWB1_44_11
2711768665	Candidatus Nomurabacteria bacterium RIFOXYB1_FULL_39_16
2728369436	Unclassified bacterium JdFR-66
2582580685	Composite genome from Trout Bog Hypolimnion pan-assembly TBhypo.metabat.4436
2711768556	Elusimicrobia bacterium RIFOXYA2_FULL_58_8
2711768537	Candidatus Berkelbacteria bacterium RIFOXYA2_FULL_43_10
2785511285	Candidatus Micrarchaeota archaeon CG_4_10_14_0_2_um_filter_55_9
2710724019	Candidatus Nomurabacteria bacterium RIFCSPLOWO2_02_FULL_42_24
2786546735	Rhodocyclales bacterium CG17_big_fil_post_rev_8_21_14_2_50_68_7
2716884101	Candidatus Staskawiczbacteria bacterium RIFOXYC2_FULL_37_19
2786546378	Elusimicrobia bacterium CG_4_10_14_3_um_filter_49_12_50_7
2721755264	Firmicutes bacterium GWF2_51_9
2626541766	Microgenomates (Collierbacteria) bacterium GW2011_GWA2_44_99
2626542408	Microgenomates (Woesebacteria) bacterium GW2011_GWA1_39_21
2786546573	Ignavibacteria bacterium CG_4_10_14_3_um_filter_37_18
2654588063	bacterium SM23_31
2708742567	Bdellovibrionales bacterium GWA1_52_35
2785511262	Candidatus Falkowbacteria bacterium CG_4_9_14_3_um_filter_38_19
2710723892	Candidatus Magasanikbacteria bacterium RIFCSPLOWO2_01_FULL_33_34
2786546289	Candidatus Levybacteria bacterium CG_4_9_14_3_um_filter_36_7
2708742954	candidate division WWE3 bacterium RIFCSPHIGHO2_01_FULL_40_23
2710723804	Candidatus Nomurabacteria bacterium RIFCSPLOWO2_01_FULL_39_17
2626542128	Parcubacteria (Uhrbacteria) bacterium GW2011_GWB2_41_36
2626541832	candidate division WS6 bacterium GW2011_GWC1_36_11
2582580665	Composite genome from Trout Bog Hypolimnion pan-assembly TBhypo.metabat.2747
2708742675	Bacteroidetes bacterium GWF2_29_10
2710723754	Candidatus Lloydbacteria bacterium RIFCSPLOWO2_01_FULL_54_18
2786546190	Candidatus Micrarchaeota archaeon CG10_big_fil_rev_8_21_14_0_10_59_7
2711768257	Candidatus Magasanikbacteria bacterium RIFCSPLOWO2_02_FULL_43_22
2626542318	Microgenomates (Woesebacteria) bacterium GW2011_GWE1_45_18
2788500135	Rhodobacteraceae bacterium CG17_big_fil_post_rev_8_21_14_2_50_63_15
2626542028	Parcubacteria (Magasanikbacteria) bacterium GW2011_GWA2_45_39
2786546357	Candidatus Roizmanbacteria bacterium CG_4_8_14_3_um_filter_36_12
2711768718	Candidatus Komeilibacteria bacterium RIFOXYC1_FULL_37_11
2788500153	Flavobacteriaceae bacterium CG18_big_fil_WC_8_21_14_2_50_34_36
2634166249	Methylococcaceae-55 (UID203)
2710264609	Candidatus Zambryskibacteria bacterium RIFCSPHIGHO2_02_FULL_43_14
2582580527	Composite genome from Lake Mendota Epilimnion pan-assembly MEint.metabat.13530
2786546751	Cytophagales bacterium CG12_big_fil_rev_8_21_14_0_65_40_12
2626542383	candidate division WWE3 bacterium GW2011_GWD2_42_11
2710723890	Candidatus Muproteobacteria bacterium RIFCSPLOWO2_01_FULL_60_18
2728369426	Chloroflexi bacterium JdFR-59
2708742657	Rhodobacteraceae bacterium GWF1_65_7
2711768479	Candidatus Collierbacteria bacterium RIFOXYA1_FULL_46_24
2721755336	Caldithrix sp. RBG_13_44_9
2585428052	AP Porphyrobacter sp. first draft
2785511209	Candidatus Nealsonbacteria bacterium CG23_combo_of_CG06-09_8_20_14_all_37_18
2710723543	Deltaproteobacteria bacterium RIFCSPHIGHO2_12_FULL_40_32
2626542173	Parcubacteria bacterium GW2011_GWB1_45_9
2710264635	Candidatus Uhrbacteria bacterium RIFCSPHIGHO2_02_FULL_60_10
2786546514	Verrucomicrobia bacterium CG22_combo_CG10-13_8_21_14_all_43_17
2788499939	Gallionellaceae bacterium CG11_big_fil_rev_8_21_14_0_20_60_62
2626541723	Microgenomates (Gottesmanbacteria) bacterium GW2011_GWA2_41_12
2721755197	Candidatus Rokubacteria bacterium GWC2_70_24
2626541806	Parcubacteria bacterium GW2011_GWD2_38_12
2710264701	Candidatus Kaiserbacteria bacterium RIFCSPHIGHO2_02_FULL_49_11
2626541876	Peregrinibacteria bacterium GW2011_GWC2_54_8
2785510911	candidate division Howlettbacteria bacterium CG_4_9_14_3_um_filter_37_10
2711768352	Candidatus Doudnabacteria bacterium RIFCSPLOWO2_12_FULL_47_12
2721755269	Elusimicrobia bacterium GWF2_62_30
2785511109	Candidatus Jorgensenbacteria bacterium CG_4_8_14_3_um_filter_38_10
2786546444	Candidatus Omnitrophica bacterium CG02_land_8_20_14_3_00__42_8
2626541731	Microgenomates (Gottesmanbacteria) bacterium GW2011_GWA2_43_14
2711768530	Candidatus Melainabacteria bacterium RIFOXYA12_FULL_32_12
2626542127	Parcubacteria bacterium GW2011_GWB2_40_8
2710723729	Candidatus Yanofskybacteria bacterium RIFCSPLOWO2_01_FULL_43_46
2785510901	candidate division Saganbacteria bacterium CG08_land_8_20_14_0_20_45_16
2626541713	Parcubacteria (Wolfebacteria) bacterium GW2011_GWC2_39_22
2626541936	Microgenomates (Collierbacteria) bacterium GW2011_GWE1_46_18
2708742796	Chloroflexi bacterium RBG_16_56_11
2711768522	Ignavibacteria bacterium RIFOXYA12_FULL_38_9
2710723717	Candidatus Nomurabacteria bacterium RIFCSPLOWO2_01_FULL_40_15
2626542073	Parcubacteria bacterium GW2011_GWA2_50_10b
2711768671	Candidatus Curtissbacteria bacterium RIFOXYB1_FULL_41_59
2713897370	Lentisphaerae bacterium RIFOXYB12_FULL_65_16
2710723641	Candidatus Yanofskybacteria bacterium RIFCSPHIGHO2_12_FULL_45_19b
2710264589	Candidatus Staskawiczbacteria bacterium RIFCSPHIGHO2_02_FULL_43_16
2785511211	Candidatus Nealsonbacteria bacterium CG18_big_fil_WC_8_21_14_2_50_37_10
2728369438	Nitrospirae bacterium JdFR-85
2654587959	Myxococcales bacterium SG8_38
2626542307	Microgenomates (Woesebacteria) bacterium GW2011_GWD1_31_12
2710264713	Candidatus Levybacteria bacterium RIFCSPHIGHO2_02_FULL_37_13
2710723868	Candidatus Chisholmbacteria bacterium RIFCSPLOWO2_01_FULL_49_14
2710264561	Candidatus Levybacteria bacterium RIFCSPHIGHO2_02_FULL_37_10
2710264651	Candidatus Peribacteria bacterium RIFCSPHIGHO2_02_FULL_55_24
2711768350	Candidatus Zambryskibacteria bacterium RIFCSPLOWO2_12_FULL_45_14
2626542217	Parcubacteria bacterium GW2011_GWC1_38_17
2711768434	Gammaproteobacteria bacterium RIFCSPLOWO2_12_FULL_52_10
2785511089	Candidatus Berkelbacteria bacterium CG_4_9_14_3_um_filter_39_23
2626541977	Parcubacteria (Uhrbacteria) bacterium GW2011_GWF2_44_350
2626542191	candidate division WWE3 bacterium GW2011_GWA1_42_46
2786546532	Bacteroidetes bacterium CG23_combo_of_CG06-09_8_20_14_all_32_9
2711768344	Candidatus Colwellbacteria bacterium RIFCSPLOWO2_12_FULL_43_11
2599185253	Candidatus Thermokryptus mobilis GFM JGI-1 Ga0063176
2582580510	AP Rhodobacteraceae bacterium bin12 first draft
2708743082	Candidatus Ryanbacteria bacterium RIFCSPHIGHO2_01_FULL_48_80
2710723541	Burkholderiales bacterium RIFCSPHIGHO2_12_FULL_69_20
2708742812	Bacteroidetes bacterium RBG_19FT_COMBO_42_10
2593339191	Composite genome from Trout Bog Hypolimnion pan-assembly TBhypo.metabat.1380
2711768520	Desulfobacterales bacterium RIFOXYA12_FULL_46_15
2786546524	Chloroflexi bacterium CG_4_8_14_3_um_filter_45_15
2734482391	Candidatus Acetothermia bacterium JdFR-51
2711768252	Candidatus Portnoybacteria bacterium RIFCSPLOWO2_12_FULL_39_9
2626542075	Parcubacteria bacterium GW2011_GWA2_51_10
2710264555	Candidatus Sungbacteria bacterium RIFCSPHIGHO2_02_FULL_51_29
2626542117	Parcubacteria bacterium GW2011_GWB1_49_7
2785510913	candidate division Moisslbacteria bacterium CG_4_9_14_0_8_um_filter_36_20
2786546683	Gammaproteobacteria bacterium CG12_big_fil_rev_8_21_14_0_65_46_12
2786546352	Candidatus Roizmanbacteria bacterium CG22_combo_CG10-13_8_21_14_all_34_12
2708742717	Gammaproteobacteria bacterium RBG_16_57_12
2708742562	archaeon RBG_16_50_20
2710264615	Candidatus Giovannonibacteria bacterium RIFCSPHIGHO2_02_FULL_44_51
2654588077	Dehalococcoidia bacterium DG_18
2582580566	Composite genome from Lake Mendota Epilimnion pan-assembly MEint.metabat.3293
2710723708	Elusimicrobia bacterium RIFCSPLOWO2_01_FULL_64_13
2708743109	Candidatus Daviesbacteria bacterium RIFCSPHIGHO2_01_FULL_41_23
2626542207	Parcubacteria (Yanofskybacteria) bacterium GW2011_GWD1_39_16
2708742908	Candidatus Taylorbacteria bacterium RIFCSPHIGHO2_01_FULL_48_38
2710724035	Candidatus Doudnabacteria bacterium RIFCSPLOWO2_02_FULL_48_8
2710723533	Candidatus Blackburnbacteria bacterium RIFCSPHIGHO2_12_FULL_44_25
2711768442	Candidatus Giovannonibacteria bacterium RIFCSPLOWO2_12_FULL_43_26
2710264690	Candidatus Yonathbacteria bacterium RIFCSPHIGHO2_02_FULL_44_14
2708742652	Tenericutes bacterium GWE2_34_108
2791354761	Sulfurimonas sp. CG01_land_8_20_14_3_00_36_23
2710724053	Candidatus Peribacteria bacterium RIFCSPLOWO2_02_FULL_55_36
2710264605	Candidatus Magasanikbacteria bacterium RIFCSPHIGHO2_02_FULL_41_35
2710723975	Deltaproteobacteria bacterium RIFCSPLOWO2_02_56_12
2785511101	Candidatus Portnoybacteria bacterium CG23_combo_of_CG06-09_8_20_14_all_37_13
2788500048	Piscirickettsiaceae bacterium CG18_big_fil_WC_8_21_14_2_50_44_103
2626541970	Parcubacteria (Jorgensenbacteria) bacterium GW2011_GWF2_41_8
2626542071	Parcubacteria (Kaiserbacteria) bacterium GW2011_GWA2_49_19
2786546350	Candidatus Roizmanbacteria bacterium CG22_combo_CG10-13_8_21_14_all_35_9
2711768244	Candidatus Gottesmanbacteria bacterium RIFCSPLOWO2_02_FULL_40_10
2721755358	Candidatus Beckwithbacteria bacterium RBG_13_42_9
2786546434	Candidatus Omnitrophica bacterium CG12_big_fil_rev_8_21_14_0_65_42_8
2708742560	Candidatus Bathyarchaeota archaeon RBG_16_57_9
2626541948	Parcubacteria (Nomurabacteria) bacterium GW2011_GWA2_41_25
2626541839	Parcubacteria bacterium GW2011_GWE1_43_8
2786546540	Actinobacteria bacterium CG08_land_8_20_14_0_20_35_9
2642422575	Actinobacteria TBE6_bin-20
2711768440	Candidatus Kuenenbacteria bacterium RIFCSPLOWO2_12_FULL_42_13
2708743001	Candidatus Kaiserbacteria bacterium RIFCSPHIGHO2_01_FULL_54_36
2785511001	Candidatus Campbellbacteria bacterium CG11_big_fil_rev_8_21_14_0_20_44_21
2786546252	Candidatus Kaiserbacteria bacterium CG_4_9_14_3_um_filter_50_16
2708742857	Candidatus Muproteobacteria bacterium RIFCSPHIGHO2_01_60_12
2708742650	Spirochaetes bacterium GWE2_31_10
2786546696	Hydrogenophilales bacterium CG_4_8_14_3_um_filter_62_83
2710724025	Candidatus Ryanbacteria bacterium RIFCSPLOWO2_02_FULL_44_40
2786546834	Xanthomonadales bacterium CG_4_10_14_3_um_filter_64_11
2711768404	Candidatus Roizmanbacteria bacterium RIFCSPLOWO2_12_FULL_37_7b
2728369428	Desulfarculaceae bacterium JdFR-95
2710723568	Burkholderiales bacterium RIFCSPHIGHO2_12_FULL_63_20
2708742591	Candidatus Rokubacteria bacterium GWA2_70_23
2721755343	Chloroflexi bacterium RBG_13_66_10
2711768334	Deltaproteobacteria bacterium RIFCSPLOWO2_12_FULL_50_11
2710723658	Gammaproteobacteria bacterium RIFCSPHIGHO2_12_FULL_37_34
2786546442	Candidatus Omnitrophica bacterium CG07_land_8_20_14_0_80_50_8
2708743099	Candidatus Roizmanbacteria bacterium RIFCSPHIGHO2_01_FULL_38_15
2708742707	Candidatus Woesebacteria bacterium RBG_16_39_8b
2711768229	Betaproteobacteria bacterium RIFCSPLOWO2_02_FULL_68_150
2711768427	Candidatus Doudnabacteria bacterium RIFCSPLOWO2_12_FULL_42_9
2710264579	Burkholderiales bacterium RIFCSPHIGHO2_02_FULL_64_19
2721755258	Planctomycetes bacterium GWF2_41_51
2710724015	Candidatus Zambryskibacteria bacterium RIFCSPLOWO2_02_FULL_39_26
2786546244	Candidatus Kaiserbacteria bacterium CG10_big_fil_rev_8_21_14_0_10_43_70
2710264643	Candidatus Curtissbacteria bacterium RIFCSPHIGHO2_02_FULL_40_16b
2710724051	Candidatus Blackburnbacteria bacterium RIFCSPLOWO2_02_FULL_44_9
2710723503	Alphaproteobacteria bacterium RIFCSPHIGHO2_12_42_13
2786546347	Candidatus Roizmanbacteria bacterium CG_4_10_14_0_8_um_filter_33_9
2785510796	Candidatus Pacearchaeota archaeon CG10_big_fil_rev_8_21_14_0_10_31_24
2654588083	miscellaneous Crenarchaeota group-15 archaeon DG-45
2710724005	Deltaproteobacteria bacterium RIFCSPLOWO2_02_FULL_46_8
2710723791	Candidatus Azambacteria bacterium RIFCSPLOWO2_01_FULL_46_25
2711768432	Deltaproteobacteria bacterium RIFCSPLOWO2_12_FULL_60_16
2716884132	Ignavibacteria bacterium RIFOXYC2_FULL_35_21
2711768502	candidate division WWE3 bacterium RIFOXYA1_FULL_42_9
2626541994	Microgenomates (Collierbacteria) bacterium GW2011_GWF2_44_15
2791354876	Candidatus Uhrbacteria bacterium CG_4_9_14_0_2_um_filter_41_50
2708743046	Candidatus Moranbacteria bacterium RIFCSPHIGHO2_01_FULL_55_24
2711768342	Candidatus Nomurabacteria bacterium RIFCSPLOWO2_12_FULL_41_10
2710724079	Burkholderiales bacterium RIFCSPLOWO2_02_FULL_66_35
2582580669	Composite genome from Trout Bog Hypolimnion pan-assembly TBhypo.metabat.3063
2711768324	Chlamydiae bacterium RIFCSPLOWO2_12_FULL_45_20
2711768234	Deltaproteobacteria bacterium RIFCSPLOWO2_02_FULL_44_34
2710723561	Candidatus Daviesbacteria bacterium RIFCSPHIGHO2_12_FULL_43_11
2786546404	Nitrospirae bacterium CG_4_8_14_3_um_filter_70_85
2710723521	Candidatus Kuenenbacteria bacterium RIFCSPHIGHO2_12_FULL_42_14
2626542465	Microgenomates bacterium GW2011_GWB1_44_8
2786546334	Candidatus Roizmanbacteria bacterium CG_4_10_14_0_2_um_filter_39_13
2721755203	Geobacteraceae bacterium GWC2_53_11
2711768430	Deltaproteobacteria bacterium RIFCSPLOWO2_12_FULL_38_8
2708742890	Candidatus Giovannonibacteria bacterium RIFCSPHIGHO2_01_FULL_43_140
2721755341	Candidatus Gottesmanbacteria bacterium RBG_13_37_7
2710723586	Candidatus Levybacteria bacterium RIFCSPHIGHO2_12_FULL_40_44
2710723856	Candidatus Daviesbacteria bacterium RIFCSPLOWO2_01_FULL_39_23
2710724055	Rhodospirillales bacterium RIFCSPLOWO2_02_FULL_58_16
2708742783	Chloroflexi bacterium RBG_16_54_18
2711768340	Candidatus Nealsonbacteria bacterium RIFCSPLOWO2_12_FULL_39_31
2711768422	Betaproteobacteria bacterium RIFCSPLOWO2_12_FULL_68_20
2786546578	Ignavibacteria bacterium CG_4_9_14_0_2_um_filter_37_13
2582580629	Composite genome from Trout Bog Epilimnion pan-assembly TBepi.metabat.3083
2710723887	Candidatus Collierbacteria bacterium RIFCSPLOWO2_01_FULL_50_23
2710264641	Candidatus Daviesbacteria bacterium RIFCSPHIGHO2_02_FULL_39_41
2711768304	Candidatus Nomurabacteria bacterium RIFCSPLOWO2_12_40_14
2710723501	Acinetobacter sp. RIFCSPHIGHO2_12_41_5
2582580708	Composite genome from Trout Bog Hypolimnion pan-assembly TBhypo.metabat.7934
2728369328	Aciduliprofundum sp. JdFR-45
2711768242	Gammaproteobacteria bacterium RIFCSPLOWO2_02_FULL_56_15
2785511348	Candidatus Magasanikbacteria bacterium CG11_big_fil_rev_8_21_14_0_20_39_34
2711768224	Sulfuricurvum sp. RIFCSPLOWO2_02_FULL_43_45
2708742634	Chlamydiae bacterium GWC2_50_10
2711768767	Lentisphaerae bacterium RIFOXYC12_FULL_60_16
2582580518	Composite genome from Lake Mendota Epilimnion pan-assembly MEint.metabat.112
2710723500	Candidatus Nomurabacteria bacterium RIFCSPHIGHO2_12_40_11
2626542047	Parcubacteria bacterium GW2011_GWA2_43_11
2786546342	Candidatus Roizmanbacteria bacterium CG09_land_8_20_14_0_10_41_9
2710264668	Deltaproteobacteria bacterium RIFCSPHIGHO2_02_FULL_42_44
2785511174	Candidatus Beckwithbacteria bacterium CG10_big_fil_rev_8_21_14_0_10_34_10
2711768412	Rhodospirillales bacterium RIFCSPLOWO2_12_FULL_67_15
2785510984	candidate division Andersenbacteria bacterium CG10_big_fil_rev_8_21_14_0_10_54_11
2711768510	Omnitrophica WOR_2 bacterium RIFOXYA12_FULL_38_10
2786546324	Candidatus Roizmanbacteria bacterium CG02_land_8_20_14_3_00_36_15
2721755369	Candidatus Levybacteria bacterium RBG_13_35_9
2710723687	Erythrobacter sp. RIFCSPHIGHO2_12_FULL_63_10
2711768420	Betaproteobacteria bacterium RIFCSPLOWO2_12_FULL_65_14
2634166263	Methylophilus methylotrophus-79 (UID3888)
2710264633	Candidatus Kaiserbacteria bacterium RIFCSPHIGHO2_02_FULL_55_17
2724678936	Elusimicrobia bacterium RIFOXYD2_FULL_34_30
2716884192	Candidatus Staskawiczbacteria bacterium RIFOXYD1_FULL_37_73
2711768414	Verrucomicrobia bacterium RIFCSPLOWO2_12_FULL_64_8
2651869538	TM7 FNEF8-2 bin_14
2728369459	Caulobacteraceae bacterium JdFR-89
2711768214	Candidatus Roizmanbacteria bacterium RIFCSPLOWO2_02_FULL_37_9
2711768500	Candidatus Woesebacteria bacterium RIFOXYA1_FULL_40_18
2786546430	Candidatus Omnitrophica bacterium CG12_big_fil_rev_8_21_14_0_65_45_16
2716884130	candidate division WWE3 bacterium RIFOXYC2_FULL_42_13
2786546314	candidate division WWE3 bacterium CG_4_10_14_0_2_um_filter_42_8
2711768332	Omnitrophica WOR_2 bacterium RIFCSPLOWO2_12_FULL_51_24
2626541829	candidate division CPR2 bacterium GW2011_GWC1_39_9
2711768250	Candidatus Zambryskibacteria bacterium RIFCSPLOWO2_02_FULL_39_14
2708742642	Bacteroidetes bacterium GWE2_39_28
2711768410	Gammaproteobacteria bacterium RIFCSPLOWO2_12_FULL_38_14
2786546340	Candidatus Roizmanbacteria bacterium CG10_big_fil_rev_8_21_14_0_10_36_26
2711768204	Candidatus Uhrbacteria bacterium RIFCSPLOWO2_02_FULL_48_12
2582580677	Composite genome from Trout Bog Hypolimnion pan-assembly TBhypo.metabat.3552
2785511074	Candidatus Pacebacteria bacterium CG11_big_fil_rev_8_21_14_0_20_34_55
2786546422	Candidatus Woesebacteria bacterium CG_4_10_14_0_2_um_filter_44_9
2626541843	Parcubacteria (Nomurabacteria) bacterium GW2011_GWE2_34_25
2721755158	Elusimicrobia bacterium GWB2_63_16
2786546304	candidate division WWE3 bacterium CG08_land_8_20_14_0_20_43_13
2708742624	Deltaproteobacteria bacterium GWC2_65_14
2708742781	Chloroflexi bacterium RBG_16_48_8
2708743064	Candidatus Doudnabacteria bacterium RIFCSPHIGHO2_01_FULL_43_23
2786546242	Candidatus Kaiserbacteria bacterium CG10_big_fil_rev_8_21_14_0_10_47_16
2648501576	Actinobacteria FSWF8 bin_16
2716884190	Candidatus Staskawiczbacteria bacterium RIFOXYD1_FULL_39_28
2785511198	Candidatus Nealsonbacteria bacterium CG_4_10_14_0_2_um_filter_38_17
2786546344	Candidatus Roizmanbacteria bacterium CG_4_10_14_0_2_um_filter_36_35
2728369451	Anaerolineales bacterium JdFR-61
2708742554	Candidatus Micrarchaeota archaeon RBG_16_49_10
2710264623	Candidatus Ryanbacteria bacterium RIFCSPHIGHO2_02_FULL_48_12
2711768330	Candidatus Ryanbacteria bacterium RIFCSPLOWO2_12_FULL_44_26
2582580585	Composite genome from Lake Mendota Epilimnion pan-assembly MEint.metabat.5493
2708742640	Candidatus Wallbacteria bacterium GWC2_49_35
2728369318	Methanomicrobia archaeon JdFR-19
2785510896	Parcubacteria bacterium CG08_land_8_20_14_0_20_48_21
2785510850	Unclassified bacterium CG_4_9_14_3_um_filter_65_15
2786546420	Candidatus Woesebacteria bacterium CG06_land_8_20_14_3_00_39_27
2724678926	Sulfurimonas sp. RIFOXYD2_FULL_37_8
2786546214	Armatimonadetes bacterium CG_4_10_14_3_um_filter_59_10
2710264631	Candidatus Sungbacteria bacterium RIFCSPHIGHO2_02_FULL_53_17
2711768232	Candidatus Melainabacteria bacterium RIFCSPLOWO2_02_FULL_35_15
2711768424	Elusimicrobia bacterium RIFCSPLOWO2_12_FULL_39_28
2708742614	Alphaproteobacteria bacterium GWB1_45_5
2634166255	Methylophilus methylotrophus-69 (UID3888)
2786546240	Candidatus Kaiserbacteria bacterium CG10_big_fil_rev_8_21_14_0_10_59_10
2785511248	Candidatus Doudnabacteria bacterium CG10_big_fil_rev_8_21_14_0_10_41_10
2710264613	Candidatus Magasanikbacteria bacterium RIFCSPHIGHO2_02_FULL_44_13
2785511266	Candidatus Falkowbacteria bacterium CG10_big_fil_rev_8_21_14_0_10_43_10
2708742873	Candidatus Peribacteria bacterium RIFCSPHIGHO2_01_FULL_51_9
2708742604	Candidatus Colwellbacteria bacterium GWA2_46_10
2786546332	Candidatus Roizmanbacteria bacterium CG_4_10_14_0_8_um_filter_39_9
2721755211	Tenericutes bacterium GWC2_39_45
2786546204	Candidatus Nealsonbacteria bacterium CG_4_10_14_0_8_um_filter_37_14
2721755348	Chloroflexi bacterium RBG_13_50_21
2711768789	Deltaproteobacteria bacterium RIFOXYD12_FULL_53_23
2654587967	Thiotrichales bacterium SG8_50
2785511272	Candidatus Micrarchaeota archaeon CG_4_10_14_0_2_um_filter_49_7
2786546410	Candidatus Nomurabacteria bacterium CG10_big_fil_rev_8_21_14_0_10_35_16
2708742949	Burkholderiales bacterium RIFCSPHIGHO2_01_FULL_63_240
2786546681	Gammaproteobacteria bacterium CG_4_9_14_3_um_filter_38_9
2710723749	Candidatus Adlerbacteria bacterium RIFCSPLOWO2_01_FULL_51_16
2711768312	Pseudomonadales bacterium RIFCSPLOWO2_12_59_9
2708742847	Deltaproteobacteria bacterium RBG_19FT_COMBO_46_12
2708743136	Candidatus Giovannonibacteria bacterium RIFCSPHIGHO2_02_43_16
2721755169	Ignavibacteria bacterium GWB2_36_8
2710724033	Candidatus Komeilibacteria bacterium RIFCSPLOWO2_02_FULL_48_11
2791354768	Sulfurimonas sp. CG15_BIG_FIL_POST_REV_8_21_14_020_36_339
2711768320	Betaproteobacteria bacterium RIFCSPLOWO2_12_FULL_64_23
2710264535	Candidatus Spechtbacteria bacterium RIFCSPHIGHO2_02_FULL_43_15b
2711768302	Gammaproteobacteria bacterium RIFCSPLOWO2_12_47_11
2626542265	Parcubacteria (Magasanikbacteria) bacterium GW2011_GWC2_34_16
2626541758	Parcubacteria bacterium GW2011_GWC2_42_6
2724678916	Sulfurimonas sp. RIFOXYD2_FULL_34_21
2651869528	Actinobacteria FNEB6 bin_35 acI-B
2785511166	Candidatus Woesearchaeota archaeon CG10_big_fil_rev_8_21_14_0_10_44_13
2786546330	Candidatus Roizmanbacteria bacterium CG01_land_8_20_14_3_00_33_9
2626541990	Parcubacteria (Giovannonibacteria) bacterium GW2011_GWA2_44_26
2654588096	Acidithiobacillales bacterium SG8_45
2711768222	Candidatus Peregrinibacteria bacterium RIFCSPLOWO2_02_FULL_39_10
2710264621	Candidatus Wildermuthbacteria bacterium RIFCSPHIGHO2_02_FULL_47_12
2708742998	Candidatus Doudnabacteria bacterium RIFCSPHIGHO2_01_FULL_50_67
2708742632	Planctomycetes bacterium GWC2_45_44
2710723864	Candidatus Woykebacteria bacterium RIFCSPLOWO2_01_FULL_43_14
2721755384	candidate division Zixibacteria bacterium RBG_16_40_9
2711768310	Nitrospirae bacterium RIFCSPLOW2_12_42_9
2786546733	Rhodocyclales bacterium CG_4_10_14_3_um_filter_68_10
2710723992	Acidobacteria bacterium RIFCSPLOWO2_02_FULL_67_21
2708743036	Candidatus Levybacteria bacterium RIFCSPHIGHO2_01_FULL_37_17
2711768237	Omnitrophica bacterium RIFCSPLOWO2_02_FULL_45_16
2713897341	Pseudomonadales bacterium RIFCSPHIGHO2_02_FULL_60_43
2710723973	Candidatus Zambryskibacteria bacterium RIFCSPLOWO2_02_39_10
2724678906	Candidatus Woesebacteria bacterium RIFOXYD1_FULL_33_11
2721755248	Bacteroidetes bacterium GWE2_41_25
2711768300	Planctomycetes bacterium RIFCSPLOWO2_12_38_17
2710723648	Candidatus Roizmanbacteria bacterium RIFCSPHIGHO2_12_FULL_42_10
2785511172	Candidatus Beckwithbacteria bacterium CG23_combo_of_CG06-09_8_20_14_all_34_8
2626542153	Parcubacteria bacterium GW2011_GWC1_38_22
2786546424	Candidatus Woesebacteria bacterium CG22_combo_CG10-13_8_21_14_all_39_10
2626542165	Parcubacteria (Yanofskybacteria) bacterium GW2011_GWC1_48_11
2785510982	Caldiserica bacterium CG02_land_8_20_14_3_00_36_38
2582580549	Composite genome from Lake Mendota Epilimnion pan-assembly MEint.metabat.2278
2710264611	Candidatus Taylorbacteria bacterium RIFCSPHIGHO2_02_FULL_43_32b
2708743126	Candidatus Doudnabacteria bacterium RIFCSPHIGHO2_01_52_17
2711768220	Candidatus Roizmanbacteria bacterium RIFCSPLOWO2_02_FULL_43_10
2708742972	Parcubacteria group bacterium RIFCSPHIGHO2_01_FULL_40_30
2708742871	Candidatus Sungbacteria bacterium RIFCSPHIGHO2_01_FULL_47_32
2711768202	Candidatus Wildermuthbacteria bacterium RIFCSPLOWO2_02_FULL_47_10
2642422573	Spirochaeta TBE6_bin-21
2708742630	Omnitrophica WOR_2 bacterium GWC2_45_7
2710264601	Candidatus Zambryskibacteria bacterium RIFCSPHIGHO2_02_FULL_39_16
2710264525	Candidatus Yanofskybacteria bacterium RIFCSPHIGHO2_02_FULL_38_22b
2786546585	Zetaproteobacteria bacterium CG_4_9_14_3_um_filter_49_83
2710724068	Deltaproteobacteria bacterium RIFCSPLOWO2_02_FULL_44_10
2710264551	Candidatus Sungbacteria bacterium RIFCSPHIGHO2_02_FULL_49_20
2626541819	Microgenomates (Woesebacteria) bacterium GW2011_GWB1_39_12
2708743026	Candidatus Abawacabacteria bacterium RIFCSPHIGHO2_01_FULL_46_8
2708742976	Candidatus Nomurabacteria bacterium RIFCSPHIGHO2_01_FULL_42_15
2710724031	Candidatus Taylorbacteria bacterium RIFCSPLOWO2_02_FULL_46_40
2711768785	Candidatus Falkowbacteria bacterium RIFOXYD12_FULL_34_57
2710723682	candidate division TM6 bacterium RIFCSPHIGHO2_12_FULL_32_22
2785511098	Candidatus Berkelbacteria bacterium CG23_combo_of_CG06-09_8_20_14_all_41_73
2708742959	Candidatus Gottesmanbacteria bacterium RIFCSPHIGHO2_01_FULL_47_48
2785511165	Candidatus Woesearchaeota archaeon CG10_big_fil_rev_8_21_14_0_10_37_12
2710723846	Candidatus Liptonbacteria bacterium RIFCSPLOWO2_01_FULL_56_20
2785511170	Candidatus Beckwithbacteria bacterium CG23_combo_of_CG06-09_8_20_14_all_47_9
2711768776	Elusimicrobia bacterium RIFOXYD12_FULL_66_9
2710724003	Candidatus Daviesbacteria bacterium RIFCSPLOWO2_02_FULL_38_15
2785511072	Candidatus Pacebacteria bacterium CG10_big_fil_rev_8_21_14_0_10_42_12
2786546222	Candidatus Uhrbacteria bacterium CG_4_9_14_0_8_um_filter_41_16
2785510995	Candidatus Komeilibacteria bacterium CG_4_9_14_0_2_um_filter_36_13
2654588062	Microgenomates bacterium DG_75
2786546310	candidate division WWE3 bacterium CG_4_10_14_0_2_um_filter_47_8
2626541899	Microgenomates (Daviesbacteria) bacterium GW2011_GWC1_40_9
2708743116	Candidatus Moranbacteria bacterium RIFCSPHIGHO2_01_FULL_54_31
2710264515	Candidatus Andersenbacteria bacterium RIFCSPHIGHO2_02_FULL_46_16
2708742552	Thaumarchaeota archaeon RBG_16_49_8
2786546300	candidate division WWE3 bacterium CG10_big_fil_rev_8_21_14_0_10_32_10
2786546250	Candidatus Kaiserbacteria bacterium CG10_big_fil_rev_8_21_14_0_10_44_10
2708743016	Candidatus Daviesbacteria bacterium RIFCSPHIGHO2_01_FULL_40_24
2786546212	Armatimonadetes bacterium CG_4_10_14_3_um_filter_66_18
2626542407	Microgenomates (Woesebacteria) bacterium GW2011_GWA1_39_12
2710723680	Candidatus Saccharibacteria bacterium RIFCSPHIGHO2_12_FULL_42_8
2708742620	Alphaproteobacteria bacterium GWC2_42_16
2710723971	Alphaproteobacteria bacterium RIFCSPLOWO2_02_42_7
2716884175	Candidatus Beckwithbacteria bacterium RIFOXYD1_FULL_50_11
2710264505	Alphaproteobacteria bacterium RIFCSPHIGHO2_02_FULL_46_13
2710724021	Candidatus Taylorbacteria bacterium RIFCSPLOWO2_02_FULL_43_22b
2710723777	Candidatus Peregrinibacteria bacterium RIFCSPLOWO2_01_FULL_48_20
2711768314	Acidobacteria bacterium RIFCSPLOWO2_12_FULL_66_10
2708742602	Candidatus Wildermuthbacteria bacterium GWA2_46_15
2721755392	Candidatus Gottesmanbacteria bacterium RBG_16_38_7b
2786546220	Candidatus Uhrbacteria bacterium CG_4_10_14_0_8_um_filter_58_22
2786546202	Candidatus Bathyarchaeota archaeon CG07_land_8_20_14_0_80_47_9
2785511070	Candidatus Pacebacteria bacterium CG10_big_fil_rev_8_21_14_0_10_44_54
2710723776	Candidatus Gottesmanbacteria bacterium RIFCSPLOWO2_01_FULL_49_10
2626542378	candidate division WWE3 bacterium GW2011_GWC2_44_85
2708742837	Betaproteobacteria bacterium RBG_19FT_COMBO_58_11
2708743060	Candidatus Staskawiczbacteria bacterium RIFCSPHIGHO2_01_FULL_41_41
2708743006	Candidatus Roizmanbacteria bacterium RIFCSPHIGHO2_01_FULL_37_16
2626542283	Parcubacteria (Nomurabacteria) bacterium GW2011_GWE1_35_16
2642422571	Gammaproteobacteria TBE6_bin-46
2708742610	Bdellovibrionales bacterium GWB1_52_6
2710724011	Candidatus Rokubacteria bacterium RIFCSPLOWO2_02_FULL_71_18
2626541769	Microgenomates bacterium GW2011_GWA2_46_7
2713897372	candidate division WOR-1 bacterium RIFOXYB2_FULL_36_35
2626542463	Microgenomates (Collierbacteria) bacterium GW2011_GWB1_44_35
2721755338	Firmicutes bacterium RBG_13_65_8
2708743087	Candidatus Taylorbacteria bacterium RIFCSPHIGHO2_01_FULL_51_15
2710724001	candidate division WOR-1 bacterium RIFCSPLOWO2_02_FULL_46_20
2708742600	Omnitrophica WOR_2 bacterium GWA2_44_7
2710724063	Betaproteobacteria bacterium RIFCSPLOWO2_02_FULL_64_12
2708743129	Candidatus Nomurabacteria bacterium RIFCSPHIGHO2_02_40_30
2710264738	Candidatus Woykebacteria bacterium RIFCSPHIGHO2_02_FULL_43_16b
2786546200	Candidatus Saccharibacteria bacterium CG_4_10_14_0_2_um_filter_52_9
2785510889	candidate division Ratteibacteria bacterium CG23_combo_of_CG06-09_8_20_14_all_48_7
2711768692	Candidatus Pacebacteria bacterium RIFOXYB1_FULL_39_46
2786546440	Candidatus Omnitrophica bacterium CG11_big_fil_rev_8_21_14_0_20_45_26
2791354779	Shewanella sp. CG_4_10_14_3_um_filter_42_91
2710723558	Candidatus Gottesmanbacteria bacterium RIFCSPHIGHO2_12_FULL_40_13
2710723932	Candidatus Sungbacteria bacterium RIFCSPLOWO2_01_FULL_51_34
2634166245	Flavobacteriaceae-49 (UID2817)
2651869508	Actinobacteria FNEB7 bin_16 acI-A
2623621017	Unknown Accumulibacter genome from EPBR bioreactor metagenome
2582580541	Composite genome from Lake Mendota Epilimnion pan-assembly MEint.metabat.17509
2711768547	Candidatus Nomurabacteria bacterium RIFOXYA2_FULL_42_12
2713897393	candidate division WOR-1 bacterium RIFOXYB2_FULL_48_7
2582580596	Composite genome from Lake Mendota Epilimnion pan-assembly MEint.metabat.6777
2721755382	Gallionellales bacterium RBG_16_57_15
2786546196	Candidatus Saccharibacteria bacterium CG11_big_fil_rev_8_21_14_0_20_41_19
2728369305	Euryarchaeota archaeon JdFR-21
2651869535	TM7 FNEB6 bin_45
2593339123	Candidatus Endoecteinascidia frumentensis ETDraft3
2721755238	Thiobacillus sp. GWE1_62_9
2654588060	bacterium SM23_57
2626542278	Microgenomates (Daviesbacteria) bacterium GW2011_GWA2_39_33
2626542227	candidate division WWE3 bacterium GW2011_GWC1_41_7
2710723937	Candidatus Sungbacteria bacterium RIFCSPLOWO2_01_FULL_54_21
2675903703	Deltaproteobacterium sp. OalgD1b
2626542317	Microgenomates (Woesebacteria) bacterium GW2011_GWE1_41_24
2626542461	Microgenomates (Gottesmanbacteria) bacterium GW2011_GWB1_44_11c
2710723739	Candidatus Nomurabacteria bacterium RIFCSPLOWO2_01_FULL_46_18
2708742939	Candidatus Amesbacteria bacterium RIFCSPHIGHO2_01_FULL_47_34
2708742865	Candidatus Woesebacteria bacterium RIFCSPHIGHO2_01_FULL_39_28
2710264653	Candidatus Saccharibacteria bacterium RIFCSPHIGHO2_02_FULL_47_12
2721755138	Candidatus Schekmanbacteria bacterium GWA2_38_9
2785511299	Candidatus Staskawiczbacteria bacterium CG10_big_fil_rev_8_21_14_0_10_38_10
2728369449	Anaerolineales bacterium JdFR-64
2721755418	Candidatus Peregrinibacteria bacterium RIFOXYB2_FULL_32_7
2791354776	Methylobacterium sp. CG08_land_8_20_14_0_20_71_15
2711768402	Candidatus Kaiserbacteria bacterium RIFCSPLOWO2_12_FULL_52_8
2785511159	Candidatus Woesearchaeota archaeon CG07_land_8_20_14_0_80_44_23
2626541874	Peregrinibacteria bacterium GW2011_GWA2_44_7
2626542363	Parcubacteria (Magasanikbacteria) bacterium GW2011_GWA2_37_8
2721755328	Candidatus Aminicenantes bacterium RBG_13_62_12
2626541782	Parcubacteria (Falkowbacteria) bacterium GW2011_GWF2_39_8
2716884147	Sulfurimonas sp. RIFOXYC2_FULL_36_7
2626542178	Parcubacteria (Wolfebacteria) bacterium GW2011_GWB1_47_243
2786546432	Candidatus Omnitrophica bacterium CG11_big_fil_rev_8_21_14_0_20_64_10
2708743106	Candidatus Levybacteria bacterium RIFCSPHIGHO2_01_FULL_40_15b
2711768485	Candidatus Moranbacteria bacterium RIFOXYA1_FULL_44_8
2710723798	Candidatus Nomurabacteria bacterium RIFCSPLOWO2_01_FULL_33_24
2708742765	Chloroflexi bacterium RBG_16_47_49
2710264541	Candidatus Andersenbacteria bacterium RIFCSPHIGHO2_02_FULL_45_11
2710264708	Candidatus Uhrbacteria bacterium RIFCSPHIGHO2_02_FULL_54_11
2711768775	Deltaproteobacteria bacterium RIFOXYD12_FULL_55_16
2711768317	Bacteroidetes bacterium RIFCSPLOWO2_12_FULL_35_15
2708742817	Candidatus Woesebacteria bacterium RBG_19FT_COMBO_37_29
2634166235	Methylosarcina-21 (UID203)
2634166253	Methylotenera mobilis-63 (UID3888)
2785510785	Candidatus Pacearchaeota archaeon CG11_big_fil_rev_8_21_14_0_20_30_13
2675903701	Candidatus Thiosymbion algarvensis (OalgG1)
2626541858	Microgenomates (Collierbacteria) bacterium GW2011_GWB2_45_17
2721755156	Chloroflexi bacterium GWB2_54_36
2713897399	Candidatus Uhrbacteria bacterium RIFOXYB2_FULL_41_10
2708742612	Treponema sp. GWB1_62_6
2710264594	Gammaproteobacteria bacterium RIFCSPHIGHO2_02_FULL_42_13
2786546596	Zetaproteobacteria bacterium CG_4_10_14_0_2_um_filter_55_20
2626541855	Microgenomates (Gottesmanbacteria) bacterium GW2011_GWB1_49_7
2708742794	candidate division Zixibacteria bacterium RBG_16_50_21
2710264533	Candidatus Jacksonbacteria bacterium RIFCSPHIGHO2_02_FULL_43_10
2721755282	Spirochaetes bacterium GWF2_52_7
2710723927	Candidatus Wildermuthbacteria bacterium RIFCSPLOWO2_01_FULL_48_16
2710723695	Nitrospinae bacterium RIFCSPLOWO2_01_FULL_39_10
2626542078	Parcubacteria bacterium GW2011_GWA2_52_8
2721755228	Deltaproteobacteria bacterium GWD2_55_8
2708742542	Candidatus Woesearchaeota archaeon RBG_13_36_6
2626542199	Parcubacteria bacterium GW2011_GWC2_45_15
2710264581	Chlamydiae bacterium RIFCSPHIGHO2_02_FULL_45_9
2711768583	Candidatus Magasanikbacteria bacterium RIFOXYA2_FULL_44_8
2710724086	Candidatus Harrisonbacteria bacterium RIFCSPLOWO2_02_FULL_41_13b
2708743054	Candidatus Yanofskybacteria bacterium RIFCSPHIGHO2_01_FULL_39_44
2651869525	TM7 FNEB6 bin_26
2721755408	Candidatus Curtissbacteria bacterium RIFCSPLOWO2_12_FULL_38_9
2710264586	Omnitrophica bacterium RIFCSPHIGHO2_02_FULL_51_18
2710723816	Candidatus Yanofskybacteria bacterium RIFCSPLOWO2_01_FULL_43_22
2708742807	Candidatus Aminicenantes bacterium RBG_19FT_COMBO_58_17
2710723569	Gammaproteobacteria bacterium RIFCSPHIGHO2_12_FULL_39_24
2710723628	Gammaproteobacteria bacterium RIFCSPHIGHO2_12_FULL_38_14
2711768694	Bdellovibrionales bacterium RIFOXYB1_FULL_39_21
2582580670	Composite genome from Trout Bog Hypolimnion pan-assembly TBhypo.metabat.3180
2582580577	Composite genome from Lake Mendota Epilimnion pan-assembly MEint.metabat.4500
2710264728	Planctomycetes bacterium RIFCSPHIGHO2_02_FULL_52_58
2626542281	Microgenomates bacterium GW2011_GWA2_40_6
2708742797	Chloroflexi bacterium RBG_16_64_43
2711768757	Candidatus Magasanikbacteria bacterium RIFOXYC12_FULL_32_21b
2711768396	Candidatus Andersenbacteria bacterium RIFCSPLOWO2_12_FULL_45_8
2634166225	Methylophilus methylotrophus-127-2 (UID203)
2713897329	Candidatus Buchananbacteria bacterium RIFCSPHIGHO2_02_FULL_56_16
2721755318	Planctomycetes bacterium RBG_13_60_9
2721755280	Planctomycetes bacterium GWF2_39_10
2711768400	Candidatus Taylorbacteria bacterium RIFCSPLOWO2_12_FULL_49_67
2626542355	Parcubacteria bacterium GW2011_GWA1_59_11
2710723806	Candidatus Nomurabacteria bacterium RIFCSPLOWO2_01_FULL_40_18
2708742879	Candidatus Nomurabacteria bacterium RIFCSPHIGHO2_01_FULL_37_25
2710264523	Candidatus Nomurabacteria bacterium RIFCSPHIGHO2_02_FULL_35_13
2710264625	Candidatus Kaiserbacteria bacterium RIFCSPHIGHO2_02_FULL_49_16
2711768577	Candidatus Melainabacteria bacterium RIFOXYA2_FULL_32_9
2634166251	Methylovulum miyakonense-55 (UID4274)
2582580581	Composite genome from Lake Mendota Epilimnion pan-assembly MEint.metabat.5338
2718217706	Ignavibacteria bacterium GWA2_54_16
2786546224	Candidatus Uhrbacteria bacterium CG_4_9_14_3_um_filter_41_35
2608642215	Rhodobacteraceae bacterium bin24
2710264658	Deltaproteobacteria bacterium RIFCSPHIGHO2_02_FULL_38_15
2710723917	Candidatus Zambryskibacteria bacterium RIFCSPLOWO2_01_FULL_45_21
2708742685	Lentisphaerae bacterium GWF2_57_35
2788499810	Flavobacteriales bacterium CG_4_10_14_0_8_um_filter_32_5
2721755148	Deltaproteobacteria bacterium GWA2_50_8
2788500150	Flavobacteriaceae bacterium CG_4_8_14_3_um_filter_34_10
2785511199	Candidatus Nealsonbacteria bacterium CG10_big_fil_rev_8_21_14_0_10_36_228
2710264531	Candidatus Harrisonbacteria bacterium RIFCSPHIGHO2_02_FULL_42_16
2724678944	Deltaproteobacteria bacterium RIFOXYD2_FULL_66_9
2734482258	Glomeribacter sp. phylotype 3
2710264513	Candidatus Kerfeldbacteria bacterium RIFCSPHIGHO2_02_FULL_42_14
2626542063	candidate division CPR3 bacterium GW2011_GWF2_35_18
2786546583	Zetaproteobacteria bacterium CG_4_9_14_0_2_um_filter_59_191
2721755182	Candidatus Jorgensenbacteria bacterium GWC1_48_12
2721755359	Candidatus Schekmanbacteria bacterium RBG_13_48_7
2711768581	Candidatus Moranbacteria bacterium RIFOXYA2_FULL_43_15
2708742622	Pelobacteraceae bacterium GWC2_58_13
2785510860	Parcubacteria bacterium CG11_big_fil_rev_8_21_14_0_20_39_22
2721755218	candidate division CPR2 bacterium GWD1_39_7
2708742596	Ignavibacteria bacterium GWA2_36_19
2626542261	Parcubacteria (Jorgensenbacteria) bacterium GW2011_GWC1_48_8
2626542255	Parcubacteria bacterium GW2011_GWC1_41_7
2708742929	Candidatus Woesebacteria bacterium RIFCSPHIGHO2_01_FULL_39_23
2710724097	Candidatus Falkowbacteria bacterium RIFCSPLOWO2_02_FULL_45_15
2721755301	Chloroflexi bacterium RBG_13_52_14
2654588088	candidate division TA06 bacterium DG_24
2710723907	Candidatus Portnoybacteria bacterium RIFCSPLOWO2_02_FULL_39_11
2654588099	Hadesarchaea archaeon DG-33
2786546692	Candidatus Altiarchaeum sp. CG12_big_fil_rev_8_21_14_0_65_33_22
2786546825	Flavobacteriales bacterium CG_4_9_14_3_um_filter_40_17
2626541872	Peregrinibacteria bacterium GW2011_GWA2_38_36
2786546694	Hydrogenophilales bacterium CG03_land_8_20_14_0_80_62_28
2708742943	Omnitrophica WOR_2 bacterium RIFCSPHIGHO2_01_FULL_52_10
2721755308	Nitrospirae bacterium RBG_13_41_22
2626542478	Microgenomates (Roizmanbacteria) bacterium GW2011_GWC2_37_13
2711768688	Candidatus Amesbacteria bacterium RIFOXYB1_FULL_47_13
2721755118	Candidatus Glassbacteria bacterium GWA2_58_10
2785510993	Candidatus Komeilibacteria bacterium CG_4_10_14_0_8_um_filter_37_78
2710264521	Methylophilales bacterium RIFCSPHIGHO2_02_FULL_57_10
2626541795	Parcubacteria (Campbellbacteria) bacterium GW2011_GWD1_35_49
2721755180	Bacteroidetes bacterium GWC1_47_7
2711768715	Candidatus Roizmanbacteria bacterium RIFOXYC1_FULL_41_16
2785511056	Candidatus Shapirobacteria bacterium CG_4_9_14_3_um_filter_36_12
2626542155	Parcubacteria bacterium GW2011_GWC1_43_30
2708742984	Candidatus Yanofskybacteria bacterium RIFCSPHIGHO2_01_FULL_44_22
2786546577	Ignavibacteria bacterium CG_4_9_14_3_um_filter_36_18
2716884173	Candidatus Pacebacteria bacterium RIFOXYD1_FULL_39_27
2626542161	Parcubacteria (Moranbacteria) bacterium GW2011_GWC1_45_18
2626541821	Microgenomates (Levybacteria) bacterium GW2011_GWB1_39_7
2710723548	Candidatus Zambryskibacteria bacterium RIFCSPHIGHO2_12_FULL_38_37
2785511128	Candidatus Portnoybacteria bacterium CG_4_10_14_0_2_um_filter_44_20
2710264718	Candidatus Daviesbacteria bacterium RIFCSPHIGHO2_02_FULL_39_8
2708743062	Candidatus Nomurabacteria bacterium RIFCSPHIGHO2_01_FULL_42_16
2786546402	Nitrospirae bacterium CG_4_10_14_0_8_um_filter_41_23
2786546815	Rhodobacterales bacterium CG18_big_fil_WC_8_21_14_2_50_71_9
2582580688	Composite genome from Trout Bog Hypolimnion pan-assembly TBhypo.metabat.4590
2626541721	Microgenomates (Levybacteria) bacterium GW2011_GWA2_40_8
2710723659	Gammaproteobacteria bacterium RIFCSPHIGHO2_12_FULL_42_10
2626542055	candidate division CPR2 bacterium GW2011_GWC2_39_10
2626541738	Parcubacteria bacterium GW2011_GWF1_40_6
2626541870	candidate division WS6 bacterium GW2011_GWF2_39_15
2626542107	Parcubacteria bacterium GW2011_GWB1_36_5
2626542171	Parcubacteria (Yanofskybacteria) bacterium GW2011_GWB1_45_11
2708742788	Candidatus Fraserbacteria bacterium RBG_16_55_9
2711768385	Candidatus Zambryskibacteria bacterium RIFCSPLOWO2_12_FULL_39_16
2785511254	Candidatus Falkowbacteria bacterium CG_4_8_14_3_um_filter_36_11
2654588059	Desulfobacterales bacterium SG8_35
2708742792	Planctomycetes bacterium RBG_16_55_9
2626542061	candidate division WS6 bacterium GW2011_GWE1_36_69
2721755259	Planctomycetes bacterium GWF2_42_9
2708743052	Candidatus Nomurabacteria bacterium RIFCSPHIGHO2_01_FULL_38_19
2786546805	Rhodospirillales bacterium CG15_BIG_FIL_POST_REV_8_21_14_020_66_15
2721755208	Elusimicrobia bacterium GWC2_61_19
2785510976	Candidatus Kuenenbacteria bacterium CG08_land_8_20_14_0_20_37_23
2711768705	Candidatus Levybacteria bacterium RIFOXYB1_FULL_40_17
2634166243	Bacteriovorax-49 (UID3187)
2785510928	candidate division Torokbacteria bacterium CG_4_10_14_0_2_um_filter_35_8
2785510875	Candidatus Desantisbacteria bacterium CG02_land_8_20_14_3_00_49_13
2711768375	Omnitrophica bacterium RIFCSPLOWO2_12_FULL_45_13
2724678934	Candidatus Staskawiczbacteria bacterium RIFOXYD2_FULL_37_10
2721755108	Planctomycetes bacterium GWA2_40_7
2710724058	Acidobacteria bacterium RIFCSPLOWO2_02_FULL_64_15
2721755159	Elusimicrobia bacterium GWB2_63_22
2711768230	Burkholderiales bacterium RIFCSPLOWO2_02_FULL_57_36
2708743044	Candidatus Terrybacteria bacterium RIFCSPHIGHO2_01_FULL_48_17
2708742790	Candidatus Curtissbacteria bacterium RBG_16_39_7
2708743050	Candidatus Staskawiczbacteria bacterium RIFCSPHIGHO2_01_FULL_36_16
2626541711	Parcubacteria bacterium GW2011_GWC2_39_11
2785510832	candidate division Gribaldobacteria bacterium CG23_combo_of_CG06-09_8_20_14_all_37_87_8
2785510945	Candidatus Diapherotrites archaeon CG08_land_8_20_14_0_20_34_12
2788500134	Rhodobacteraceae bacterium CG17_big_fil_post_rev_8_21_14_2_50_65_11
2710723920	Candidatus Yanofskybacteria bacterium RIFCSPLOWO2_01_FULL_45_72
2716884171	Hydrogenophilales bacterium RIFOXYD1_FULL_62_11
2582580692	Composite genome from Trout Bog Hypolimnion pan-assembly TBhypo.metabat.4848
2716884117	Omnitrophica WOR_2 bacterium RIFOXYC2_FULL_43_9
2654587956	Gammaproteobacteria bacterium SG8_11
2724678942	Candidatus Lambdaproteobacteria bacterium RIFOXYD2_FULL_56_26
2721755147	Deltaproteobacteria bacterium GWA2_54_12
2786546753	Cytophagales bacterium CG17_big_fil_post_rev_8_21_14_2_50_40_13
2626542081	Parcubacteria bacterium GW2011_GWA2_53_21
2710723582	Candidatus Daviesbacteria bacterium RIFCSPHIGHO2_12_FULL_37_16
2711768690	Bdellovibrionales bacterium RIFOXYB1_FULL_37_110
2708742921	Candidatus Curtissbacteria bacterium RIFCSPHIGHO2_01_FULL_34_40
2708742696	candidate division WWE3 bacterium RBG_13_37_7
2785511346	Candidatus Magasanikbacteria bacterium CG10_big_fil_rev_8_21_14_0_10_43_6
2626542417	Microgenomates (Curtissbacteria) bacterium GW2011_GWA1_41_11
2711768212	Candidatus Daviesbacteria bacterium RIFCSPLOWO2_02_FULL_36_7
2626542453	Microgenomates (Woesebacteria) bacterium GW2011_GWB1_41_10
2710723719	Parcubacteria group bacterium RIFCSPLOWO2_01_FULL_40_65
2708743009	Candidatus Woesebacteria bacterium RIFCSPHIGHO2_01_FULL_38_26b
2582580662	Composite genome from Trout Bog Hypolimnion pan-assembly TBhypo.metabat.254
2711768285	Candidatus Daviesbacteria bacterium RIFCSPLOWO2_02_FULL_43_11
2634166241	Bacteroidetes-49 (UID2591)
2608642209	Rhizobiales bacterium HL-109
2626542479	Microgenomates (Levybacteria) bacterium GW2011_GWC2_37_7
2724678924	Candidatus Magasanikbacteria bacterium RIFOXYD2_FULL_41_14
2711768496	Candidatus Magasanikbacteria bacterium RIFOXYA1_FULL_40_8
2713897356	Deltaproteobacteria bacterium RIFOXYB12_FULL_58_9
2791354769	Sulfurimonas sp. CG23_combo_of_CG06-09_8_20_14_all_36_33
2724678940	Candidatus Falkowbacteria bacterium RIFOXYD2_FULL_39_16
2785510857	Unclassified bacterium CG17_big_fil_post_rev_8_21_14_2_50_64_8
2721755184	Candidatus Woesebacteria bacterium GWC1_42_13
2786546748	Desulfobacterales bacterium CG07_land_8_20_14_0_80_52_14
2785510918	candidate division Stahlbacteria bacterium CG23_combo_of_CG06-09_8_20_14_all_34_7
2626541728	Microgenomates (Gottesmanbacteria) bacterium GW2011_GWA2_42_18
2710723684	Alphaproteobacteria bacterium RIFCSPHIGHO2_12_FULL_45_9
2710723989	Gallionellales bacterium RIFCSPLOWO2_02_58_13
2708742544	Candidatus Pacearchaeota archaeon RBG_13_33_26
2786546322	Candidatus Roizmanbacteria bacterium CG07_land_8_20_14_0_80_34_15
2710723523	Candidatus Giovannonibacteria bacterium RIFCSPHIGHO2_12_FULL_44_42
2648501574	Actinobacteria FSWF8 bin_3
2711768747	Candidatus Woesebacteria bacterium RIFOXYC1_FULL_46_16
2724678914	Candidatus Staskawiczbacteria bacterium RIFOXYD2_FULL_37_9
2708743134	Candidatus Nealsonbacteria bacterium RIFCSPHIGHO2_02_38_10
2785510959	Candidatus Niyogibacteria bacterium CG10_big_fil_rev_8_21_14_0_10_46_36
2710723638	Candidatus Magasanikbacteria bacterium RIFCSPHIGHO2_12_FULL_41_16
2711768483	Candidatus Woesebacteria bacterium RIFOXYA1_FULL_38_9
2711768773	candidate division WOR-1 bacterium RIFOXYC12_FULL_54_18
2724678904	Candidatus Woesebacteria bacterium RIFOXYD1_FULL_40_21
2728369333	Archaeoglobus sp. JdFR-31
2785511270	Candidatus Falkowbacteria bacterium CG23_combo_of_CG06-09_8_20_14_all_41_10
2654587964	Nitrospira bacterium SG8_3
2785511208	Candidatus Nealsonbacteria bacterium CG10_big_fil_rev_8_21_14_0_10_36_24
2708743034	Chlamydiae bacterium RIFCSPHIGHO2_01_FULL_44_39
2626542245	Parcubacteria bacterium GW2011_GWD2_40_9
2710723538	Sulfurimonas sp. RIFCSPHIGHO2_12_FULL_36_9
2711768477	Candidatus Woesebacteria bacterium RIFOXYA1_FULL_31_71
2710723965	Rhodospirillales bacterium RIFCSPLOWO2_01_FULL_65_14
2721755395	Deltaproteobacteria bacterium RBG_16_48_10
2785510783	Candidatus Pacearchaeota archaeon CG_4_10_14_0_2_um_filter_05_32_18
2786546285	Candidatus Levybacteria bacterium CG22_combo_CG10-13_8_21_14_all_35_11
2710723852	Candidatus Curtissbacteria bacterium RIFCSPLOWO2_01_FULL_38_11b
2785511146	Candidatus Woesearchaeota archaeon CG10_big_fil_rev_8_21_14_0_10_36_11
2786546690	Candidatus Altiarchaeum sp. CG_4_9_14_0_8_um_filter_32_206
2626542451	Microgenomates (Roizmanbacteria) bacterium GW2011_GWB1_40_7
2728369429	Pseudomonas sp. JdFR-91
2634166223	Rhodocyclaceae-127 (UID3972)
2626542145	candidate division TM6 bacterium GW2011_GWA2_36_9
2786546522	Chloroflexi bacterium CG07_land_8_20_14_0_80_51_10
2710723862	Candidatus Gottesmanbacteria bacterium RIFCSPLOWO2_01_FULL_42_10
2716884137	Candidatus Uhrbacteria bacterium RIFOXYC2_FULL_47_19
2710723693	Alphaproteobacteria bacterium RIFCSPLOWO2_01_FULL_40_26
2724678932	candidate division WWE3 bacterium RIFOXYD2_FULL_43_10
2708742878	Candidatus Nomurabacteria bacterium RIFCSPHIGHO2_01_FULL_36_23
2785511164	Candidatus Woesearchaeota archaeon CG10_big_fil_rev_8_21_14_0_10_32_24
2711768210	Candidatus Kaiserbacteria bacterium RIFCSPLOWO2_02_FULL_54_13
2626542045	Parcubacteria bacterium GW2011_GWA2_42_80
2786546833	Xanthomonadales bacterium CG_4_9_14_3_um_filter_62_6
2695420954	Paenibacillus cineris CONT 1016173 Genome Extracted from a Metagenome
2626542415	Microgenomates (Curtissbacteria) bacterium GW2011_GWA1_40_47
2710723531	Candidatus Curtissbacteria bacterium RIFCSPHIGHO2_12_FULL_41_13
2708743024	Candidatus Chisholmbacteria bacterium RIFCSPHIGHO2_01_FULL_52_32
2786546199	Candidatus Saccharibacteria bacterium CG_4_9_14_0_2_um_filter_41_9
2626542353	Parcubacteria bacterium GW2011_GWA1_54_9
2728369421	Thermoanaerobacterales bacterium JdFR-68
2708743042	Candidatus Pacebacteria bacterium RIFCSPHIGHO2_01_FULL_46_10
2626542137	Parcubacteria (Azambacteria) bacterium GW2011_GWB1_42_72
2626542335	Parcubacteria (Giovannonibacteria) bacterium GW2011_GWA1_44_29
2626541718	Parcubacteria bacterium GW2011_GWC2_40_31
2713897380	Gammaproteobacteria bacterium RIFOXYB2_FULL_38_6
2711768679	Candidatus Vogelbacteria bacterium RIFOXYB1_FULL_42_16
2708743114	Candidatus Amesbacteria bacterium RIFCSPHIGHO2_01_FULL_48_32b
2626542405	Microgenomates (Levybacteria) bacterium GW2011_GWA1_39_11
2711768200	Acidobacteria bacterium RIFCSPHIGHO2_12_FULL_67_30
2626541784	Parcubacteria (Nomurabacteria) bacterium GW2011_GWF2_40_12
2785510812	candidate division Huberarchaea archaeon CG17_big_fil_post_rev_8_21_14_2_50_31_73
2708743140	Candidatus Giovannonibacteria bacterium RIFCSPHIGHO2_02_42_15
2708743104	Candidatus Roizmanbacteria bacterium RIFCSPHIGHO2_01_FULL_39_8
2654588094	Deltaproteobacteria bacterium SG8_13
2710724034	Candidatus Sungbacteria bacterium RIFCSPLOWO2_02_FULL_48_13b
2710723844	Candidatus Kaiserbacteria bacterium RIFCSPLOWO2_01_FULL_54_22
2710724076	Gammaproteobacteria bacterium RIFCSPLOWO2_02_FULL_47_50
2626542379	candidate division WWE3 bacterium GW2011_GWC2_44_9
2721755213	Candidatus Woesebacteria bacterium GWC2_33_12
2710723709	Candidatus Nomurabacteria bacterium RIFCSPLOWO2_01_FULL_33_17
2708742683	candidate division CPR3 bacterium GWF2_35_18
2708742909	Candidatus Kaiserbacteria bacterium RIFCSPHIGHO2_01_FULL_49_13
2708743040	Candidatus Woykebacteria bacterium RIFCSPHIGHO2_01_FULL_43_29
2785510781	Unclassified archaeon CG_4_10_14_0_2_um_filter_Archaea_38_6
2708743004	Candidatus Kaiserbacteria bacterium RIFCSPHIGHO2_01_FULL_58_22
2724678922	Candidatus Firestonebacteria bacterium RIFOXYD2_FULL_39_29
2634166221	Methylotenera mobilis-123 (UID3888)
2710723799	Candidatus Campbellbacteria bacterium RIFCSPLOWO2_01_FULL_34_15
2786546823	Flavobacteriales bacterium CG_4_9_14_0_2_um_filter_32_27
2786546185	Candidatus Shapirobacteria bacterium CG08_land_8_20_14_0_20_39_18
2728369411	Candidatus Acetothermia bacterium JdFR-46
2786546257	Candidatus Peregrinibacteria bacterium CG_4_10_14_0_2_um_filter_41_8
2651869539	TM7 FNEF8-2 bin_20
2626542235	Microgenomates (Levybacteria) bacterium GW2011_GWA1_39_32
2626542253	Parcubacteria (Nomurabacteria) bacterium GW2011_GWE1_32_28
2708742974	Candidatus Yanofskybacteria bacterium RIFCSPHIGHO2_01_FULL_41_27
2626542296	Parcubacteria (Yanofskybacteria) bacterium GW2011_GWE2_40_11
2711768737	candidate division WWE3 bacterium RIFOXYC1_FULL_42_17
2785511326	Candidatus Moranbacteria bacterium CG_4_8_14_3_um_filter_34_16
2710723528	Candidatus Curtissbacteria bacterium RIFCSPHIGHO2_12_FULL_38_37
2710723691	Candidatus Beckwithbacteria bacterium RIFCSPHIGHO2_12_FULL_49_13
2786546831	Xanthomonadales bacterium CG17_big_fil_post_rev_8_21_14_2_50_64_11
2708742753	Acidobacteria bacterium RBG_16_64_8
2582580702	Composite genome from Trout Bog Hypolimnion pan-assembly TBhypo.metabat.6286
2724678912	candidate division WOR-1 bacterium RIFOXYD2_FULL_36_8
2785511287	Candidatus Micrarchaeota archaeon CG06_land_8_20_14_3_00_50_6
2642422578	Polynucleobacter TBE6_bin-10_Pnec
2626541868	candidate division WS6 bacterium GW2011_GWF1_36_8
2626542351	Parcubacteria (Adlerbacteria) bacterium GW2011_GWA1_54_10
2786546813	Rhodobacterales bacterium CG_4_9_14_3_um_filter_71_31
2626541708	Parcubacteria (Yanofskybacteria) bacterium GW2011_GWC2_37_9
2626542135	Parcubacteria (Azambacteria) bacterium GW2011_GWB1_42_17
2724678902	Candidatus Moranbacteria bacterium RIFOXYD1_FULL_44_12
2648501572	Actinobacteria FSWF8 bin_2
2728369329	Archaeoglobus sp. JdFR-23
2654588067	candidate division TA06 bacterium SM23_40
2785511036	Candidatus Shapirobacteria bacterium CG_4_10_14_0_2_um_filter_40_12
2711768377	Omnitrophica WOR_2 bacterium RIFCSPLOWO2_12_FULL_51_8
2710724048	Candidatus Daviesbacteria bacterium RIFCSPLOWO2_02_FULL_40_8
2626542315	Microgenomates (Woesebacteria) bacterium GW2011_GWD2_40_19
2713897398	Candidatus Falkowbacteria bacterium RIFOXYB2_FULL_38_15
2626542035	Parcubacteria bacterium GW2011_GWA2_46_9
2708742762	Chloroflexi bacterium RBG_16_57_11
2626542443	Microgenomates (Roizmanbacteria) bacterium GW2011_GWA2_35_8
2710723826	Candidatus Taylorbacteria bacterium RIFCSPLOWO2_01_FULL_45_59
2654587946	candidate division WOR_3 bacterium SM1_77
2786546296	Candidatus Yanofskybacteria bacterium CG10_big_fil_rev_8_21_14_0_10_36_16
2788500047	Piscirickettsiaceae bacterium CG_4_9_14_3_um_filter_43_564
2626542053	Parcubacteria bacterium GW2011_GWA2_43_9b
2711768667	Candidatus Staskawiczbacteria bacterium RIFOXYB1_FULL_37_44
2626542225	candidate division WWE3 bacterium GW2011_GWA2_46_9
2626542305	Microgenomates (Woesebacteria) bacterium GW2011_GWC2_45_9
2785511226	Candidatus Nealsonbacteria bacterium CG03_land_8_20_14_0_80_36_12
2708742677	Bacteroidetes bacterium GWF2_43_11
2582580598	Composite genome from Lake Mendota Epilimnion pan-assembly MEint.metabat.68
2708743130	Candidatus Zambryskibacteria bacterium RIFCSPHIGHO2_02_39_10
2708742681	Bacteroidetes bacterium GWF2_49_14
2724678900	Candidatus Wolfebacteria bacterium RIFOXYD1_FULL_48_65
2713897346	candidate division WWE3 bacterium RIFOXYA2_FULL_46_9
2786546821	Flavobacteriales bacterium CG_4_10_14_0_2_um_filter_35_18
2713897364	Candidatus Raymondbacteria bacterium RifOxyB12_full_50_8
2582580519	Composite genome from Lake Mendota Epilimnion pan-assembly MEint.metabat.11260
2721755128	Bacteroidetes bacterium GWA2_31_9
2708743122	Candidatus Saccharibacteria bacterium RIFCSPHIGHO2_01_FULL_48_12
2716884183	Candidatus Kaiserbacteria bacterium RIFOXYD1_FULL_42_15
2721755295	Planctomycetes bacterium RBG_13_63_9
2626541848	Parcubacteria bacterium GW2011_GWE2_38_18
2708743030	Sphingomonadales bacterium RIFCSPHIGHO2_01_FULL_65_20
2710723649	Candidatus Woykebacteria bacterium RIFCSPHIGHO2_12_FULL_43_10
2626542251	Parcubacteria (Wolfebacteria) bacterium GW2011_GWD2_47_17
2708743137	Candidatus Zambryskibacteria bacterium RIFCSPHIGHO2_02_38_10.5
2785511306	Candidatus Zambryskibacteria bacterium CG10_big_fil_rev_8_21_14_0_10_42_12
2785511126	Candidatus Portnoybacteria bacterium CG_4_9_14_3_um_filter_43_11
2716884127	Candidatus Curtissbacteria bacterium RIFOXYC2_FULL_41_11
2626542215	Parcubacteria (Wolfebacteria) bacterium GW2011_GWC1_37_10
2708743022	Candidatus Chisholmbacteria bacterium RIFCSPHIGHO2_01_FULL_48_12
2593339186	Composite genome from Trout Bog Hypolimnion pan-assembly TBhypo.metabat.3838.v2
2710723834	Candidatus Zambryskibacteria bacterium RIFCSPLOWO2_01_FULL_48_25
2785510873	Unclassified bacterium CG_4_10_14_0_2_um_filter_33_32
2626542025	Parcubacteria bacterium GW2011_GWA2_45_15
2785511162	Candidatus Woesearchaeota archaeon CG_4_10_14_0_8_um_filter_47_5
2785511026	Candidatus Colwellbacteria bacterium CG_4_9_14_0_2_um_filter_50_12
2710723511	Alphaproteobacteria bacterium RIFCSPHIGHO2_12_FULL_66_14
2710723518	Gammaproteobacteria bacterium RIFCSPHIGHO2_12_FULL_63_22
2785511216	Candidatus Nealsonbacteria bacterium CG23_combo_of_CG06-09_8_20_14_all_40_13
2708743112	Candidatus Daviesbacteria bacterium RIFCSPHIGHO2_01_FULL_43_17
2785511187	Candidatus Nealsonbacteria bacterium CG_4_10_14_3_um_filter_36_16
2710264686	Candidatus Colwellbacteria bacterium RIFCSPHIGHO2_02_FULL_43_15
2786546377	Elusimicrobia bacterium CG08_land_8_20_14_0_20_51_18
2785510847	candidate division Gribaldobacteria bacterium CG07_land_8_20_14_0_80_33_18
2708742585	Elusimicrobia bacterium GWA2_56_46
2626542205	Parcubacteria bacterium GW2011_GWC2_49_9
2626542151	Parcubacteria (Wolfebacteria) bacterium GW2011_GWB2_46_69
2708743120	Phenylobacterium sp. RIFCSPHIGHO2_01_FULL_70_10
2626542115	Parcubacteria bacterium GW2011_GWB1_48_6
2626542179	Parcubacteria (Nomurabacteria) bacterium GW2011_GWB1_47_6
2582580700	Composite genome from Trout Bog Hypolimnion pan-assembly TBhypo.metabat.5891
2721755272	Sulfurimonas sp. GWF2_37_8
2710723595	Burkholderiales bacterium RIFCSPHIGHO2_12_FULL_61_11
2710264545	Candidatus Taylorbacteria bacterium RIFCSPHIGHO2_02_FULL_46_13
2711768512	Lentisphaerae bacterium RIFOXYA12_FULL_60_10
2626542441	Microgenomates (Roizmanbacteria) bacterium GW2011_GWA2_34_18
2711768277	Candidatus Daviesbacteria bacterium RIFCSPLOWO2_02_FULL_36_8
2708743002	Candidatus Kaiserbacteria bacterium RIFCSPHIGHO2_01_FULL_55_79
2710723842	Candidatus Kaiserbacteria bacterium RIFCSPLOWO2_01_FULL_54_13
2626542051	Parcubacteria (Nomurabacteria) bacterium GW2011_GWA2_43_66
2626542105	Parcubacteria (Nomurabacteria) bacterium GW2011_GWB1_35_20
2786546737	Nitrosopumilales archaeon CG15_BIG_FIL_POST_REV_8_21_14_020_33_23
2785511160	Candidatus Woesearchaeota archaeon CG08_land_8_20_14_0_20_43_7
2626541791	Parcubacteria (Yanofskybacteria) bacterium GW2011_GWF2_43_596
2708743110	Candidatus Gottesmanbacteria bacterium RIFCSPHIGHO2_01_FULL_42_12
2785511016	Candidatus Yonathbacteria bacterium CG_4_10_14_3_um_filter_47_65
2708742767	Actinobacteria bacterium RBG_16_68_12
2713897426	Candidatus Veblenbacteria bacterium RIFOXYC2_FULL_42_11
2654588092	Betaproteobacteria bacterium SG8_41
2630969032	Nostoc sp. 996 extraction
2708742863	candidate division WOR-1 bacterium RIFCSPHIGHO2_01_FULL_53_15
2708742967	Candidatus Buchananbacteria bacterium RIFCSPHIGHO2_01_FULL_39_14
2626542005	Parcubacteria bacterium GW2011_GWA1_40_21
2626542343	Parcubacteria bacterium GW2011_GWA1_47_8
2710723752	Candidatus Liptonbacteria bacterium RIFCSPLOWO2_01_FULL_53_13
2626542433	Microgenomates (Amesbacteria) bacterium GW2011_GWA1_47_20
2708743100	Candidatus Roizmanbacteria bacterium RIFCSPHIGHO2_01_FULL_38_41
2710723824	Candidatus Jorgensenbacteria bacterium RIFCSPLOWO2_01_FULL_45_25b
2786546396	Nitrospirae bacterium CG08_land_8_20_14_0_20_52_24
2711768717	Candidatus Yanofskybacteria bacterium RIFOXYC1_FULL_44_16
2626542079	Parcubacteria (Uhrbacteria) bacterium GW2011_GWA2_52_8d
2716884144	Candidatus Magasanikbacteria bacterium RIFOXYC2_FULL_42_28
2708743000	Candidatus Lloydbacteria bacterium RIFCSPHIGHO2_01_FULL_54_11
2626542468	Microgenomates (Woesebacteria) bacterium GW2011_GWB1_45_5
2785511060	Candidatus Pacebacteria bacterium CG_4_9_14_0_2_um_filter_40_15
2785511006	Candidatus Harrisonbacteria bacterium CG10_big_fil_rev_8_21_14_0_10_40_38
2582580562	Composite genome from Lake Mendota Epilimnion pan-assembly MEint.metabat.30805
2710724043	Candidatus Roizmanbacteria bacterium RIFCSPLOWO2_02_FULL_37_19
2654588057	Planctomycetes bacterium SM23_32
2724678930	Candidatus Zambryskibacteria bacterium RIFOXYD2_FULL_43_10
2710723840	Candidatus Kaiserbacteria bacterium RIFCSPLOWO2_01_FULL_52_36
2711768283	Candidatus Daviesbacteria bacterium RIFCSPLOWO2_02_FULL_41_8
2710723508	Candidatus Kaiserbacteria bacterium RIFCSPHIGHO2_12_45_16
2785511087	Candidatus Lloydbacteria bacterium CG22_combo_CG10-13_8_21_14_all_47_15
2654587936	Gemmatimonas sp. SM23_52
2716884165	Candidatus Shapirobacteria bacterium RIFOXYD1_FULL_38_32
2713897416	Nitrospirae bacterium RIFOXYB2_FULL_43_5
2710723814	Candidatus Nomurabacteria bacterium RIFCSPLOWO2_01_FULL_43_15
2728369319	Thermoplasmatales archaeon JdFR-43
2654587960	miscellaneous Crenarchaeota group-6 archaeon AD8-1
2654588090	candidate division TA06 bacterium DG_78
2710723839	Candidatus Kaiserbacteria bacterium RIFCSPLOWO2_01_FULL_52_12b
2786546277	Candidatus Peregrinibacteria bacterium CG10_big_fil_rev_8_21_14_0_10_44_7
2734482256	Glomeribacter phylotype 2
2710724038	Candidatus Uhrbacteria bacterium RIFCSPLOWO2_02_FULL_51_9
2608642198	Halomonas sp. HL-93
2711768707	Candidatus Peribacteria bacterium RIFOXYB1_FULL_57_12
2713897339	Candidatus Levybacteria bacterium RIFCSPHIGHO2_02_FULL_42_12
2710264741	Candidatus Harrisonbacteria bacterium RIFCSPHIGHO2_02_FULL_40_20
2626542423	Microgenomates (Gottesmanbacteria) bacterium GW2011_GWA1_44_24b
2585427524	Candidatus Endoecteinascidia frumentensis ETDraft2
2786546381	Elusimicrobia bacterium CG22_combo_CG10-13_8_21_14_all_63_91
2708742970	Candidatus Nomurabacteria bacterium RIFCSPHIGHO2_01_FULL_40_10
2728369409	Dehalococcoides sp. JdFR-56
2713897406	candidate division WWE3 bacterium RIFOXYB2_FULL_41_6
2710264628	Candidatus Kaiserbacteria bacterium RIFCSPHIGHO2_02_FULL_50_50
2708742840	Thermodesulfovibrio sp. RBG_19FT_COMBO_42_12
2710264569	Candidatus Levybacteria bacterium RIFCSPHIGHO2_02_FULL_40_18
2710264669	Deltaproteobacteria bacterium RIFCSPHIGHO2_02_FULL_43_33
2708742861	Caulobacterales bacterium RIFCSPHIGHO2_01_FULL_70_19
2626542431	Microgenomates bacterium GW2011_GWA1_46_7
2785511161	Candidatus Woesearchaeota archaeon CG_4_10_14_0_2_um_filter_33_10
2626542143	Parcubacteria (Nomurabacteria) bacterium GW2011_GWB1_43_7
2785510949	Candidatus Tagabacteria bacterium CG_4_10_14_0_2_um_filter_40_13
2721755195	Elusimicrobia bacterium GWC2_56_31
2713897362	Ignavibacteria bacterium RIFOXYB12_FULL_35_14
2710264739	Omnitrophica WOR_2 bacterium RIFCSPHIGHO2_02_FULL_45_21
2721755393	Candidatus Gottesmanbacteria bacterium RBG_16_43_7
2786546283	Candidatus Yanofskybacteria bacterium CG10_big_fil_rev_8_21_14_0_10_37_15
2626541859	Microgenomates (Woesebacteria) bacterium GW2011_GWC1_30_29
2582580689	Composite genome from Trout Bog Hypolimnion pan-assembly TBhypo.metabat.4645
2626541856	Microgenomates (Collierbacteria) bacterium GW2011_GWB2_42_12
2626542403	Microgenomates (Daviesbacteria) bacterium GW2011_GWA1_38_7
2710723676	Candidatus Roizmanbacteria bacterium RIFCSPHIGHO2_12_FULL_39_8
2721755339	Nitrospirae bacterium RBG_13_39_12
2626542333	Parcubacteria (Wolfebacteria) bacterium GW2011_GWA1_44_24
2708742789	Candidatus Woesebacteria bacterium RBG_16_34_12
2654587926	Dehalococcoidia bacterium SM23_28_2
2626541942	Parcubacteria bacterium GW2011_GWA2_40_8
2711768281	Candidatus Curtissbacteria bacterium RIFCSPLOWO2_02_FULL_40_11
2713897336	Candidatus Magasanikbacteria bacterium RIFCSPHIGHO2_02_FULL_47_14
2626541887	Parcubacteria (Moranbacteria) bacterium GW2011_GWF1_35_5
2710264584	Deltaproteobacteria bacterium RIFCSPHIGHO2_02_FULL_40_28
2785510998	Candidatus Campbellbacteria bacterium CG22_combo_CG10-13_8_21_14_all_43_18
2708742966	Candidatus Spechtbacteria bacterium RIFCSPHIGHO2_01_FULL_38_11
2711768296	Gammaproteobacteria bacterium RIFCSPLOWO2_02_FULL_52_10
2654588075	candidate division Zixibacteria bacterium SM23_73_2
2788500157	Flavobacteriaceae bacterium CG_4_9_14_3_um_filter_33_16
2713897360	Sulfurimonas sp. RIFOXYB12_FULL_35_9
2619619054	Unclassified Chloroflexi bacterium bin156 (Genome Extraction)
2708742855	Candidatus Giovannonibacteria bacterium RIFCSPHIGHO2_01_45_12
2626542421	Microgenomates (Woesebacteria) bacterium GW2011_GWA1_41_7
2626542241	Parcubacteria bacterium GW2011_GWD1_42_9
2710723830	Candidatus Wildermuthbacteria bacterium RIFCSPLOWO2_01_FULL_47_18
2681812803	Deltaproteobacterium sp. OalgD1a
2786546588	Zetaproteobacteria bacterium CG_4_10_14_0_8_um_filter_49_80
2626542397	Microgenomates (Gottesmanbacteria) bacterium GW2011_GWA1_34_13
2710723961	Candidatus Amesbacteria bacterium RIFCSPLOWO2_01_FULL_48_50
2710723822	Candidatus Giovannonibacteria bacterium RIFCSPLOWO2_01_FULL_45_140
2710264618	Candidatus Taylorbacteria bacterium RIFCSPHIGHO2_02_FULL_45_28
2593339187	Composite genome from Trout Bog Epilimnion pan-assembly TBepi.metabat.439.v2
2626542233	candidate division WWE3 bacterium GW2011_GWF1_44_14
2788500117	Comamonadaceae bacterium CG_4_10_14_0_8_um_filter_57_29
2626542323	Parcubacteria (Yanofskybacteria) bacterium GW2011_GWA1_39_13
2786546689	Candidatus Altiarchaeum sp. CG_4_8_14_3_um_filter_33_2054
2710724028	Candidatus Giovannonibacteria bacterium RIFCSPLOWO2_02_FULL_45_14
2786546594	Zetaproteobacteria bacterium CG23_combo_of_CG06-09_8_20_14_all_54_7
2710723997	Betaproteobacteria bacterium RIFCSPLOWO2_02_FULL_67_19
2791354758	Sulfurimonas sp. CG_4_9_14_0_2_um_filter_36_407
2582580592	Composite genome from Lake Mendota Epilimnion pan-assembly MEint.metabat.6180
2710723639	Candidatus Giovannonibacteria bacterium RIFCSPHIGHO2_12_FULL_43_15
2710723836	Candidatus Yanofskybacteria bacterium RIFCSPLOWO2_01_FULL_49_25
2710723621	Candidatus Saccharibacteria bacterium RIFCSPHIGHO2_12_FULL_47_17
2721755391	Candidatus Levybacteria bacterium RBG_16_35_6
2786546281	Candidatus Magasanikbacteria bacterium CG_4_10_14_0_2_um_filter_37_12
2626542331	Parcubacteria bacterium GW2011_GWA1_44_13
2626541749	Parcubacteria (Uhrbacteria) bacterium GW2011_GWC2_41_11
2710723812	Candidatus Nomurabacteria bacterium RIFCSPLOWO2_01_FULL_42_20
2785511154	Candidatus Woesearchaeota archaeon CG11_big_fil_rev_8_21_14_0_20_57_5
2721755249	Bacteroidetes bacterium GWE2_42_24
2626542133	Parcubacteria bacterium GW2011_GWB1_41_6
2626542313	Microgenomates bacterium GW2011_GWD1_47_13
2651869519	Bacteroidetes FNEB6 bin_6
2626541975	Parcubacteria (Nomurabacteria) bacterium GW2011_GWF2_43_8
2710723737	Candidatus Niyogibacteria bacterium RIFCSPLOWO2_01_FULL_45_48
2710723820	Candidatus Ryanbacteria bacterium RIFCSPLOWO2_01_FULL_44_230
2654587962	Nitrospira bacterium SG8_35_4
2785511061	Candidatus Pacebacteria bacterium CG_4_10_14_3_um_filter_34_15
2634166261	Burkholderiales-76 (UID4002)
2710723802	Candidatus Wolfebacteria bacterium RIFCSPLOWO2_01_FULL_38_11
2626542033	Parcubacteria bacterium GW2011_GWA2_46_39
2710264659	Nitrospinae bacterium RIFCSPHIGHO2_02_FULL_39_82
2710264553	Candidatus Lloydbacteria bacterium RIFCSPHIGHO2_02_FULL_50_18
2708742897	Candidatus Yanofskybacteria bacterium RIFCSPHIGHO2_01_FULL_44_24
2626541957	Microgenomates (Woesebacteria) bacterium GW2011_GWF1_46_13
2785511054	Candidatus Shapirobacteria bacterium CG10_big_fil_rev_8_21_14_0_10_38_8
2728369435	Unclassified bacterium JdFR-67
2582580590	Composite genome from Lake Mendota Epilimnion pan-assembly MEint.metabat.6031
2582580707	Composite genome from Trout Bog Hypolimnion pan-assembly TBhypo.metabat.7925
2710723955	Candidatus Curtissbacteria bacterium RIFCSPLOWO2_01_FULL_41_28
2786546483	Chlamydiae bacterium CG10_big_fil_rev_8_21_14_0_10_42_34
2785511333	Candidatus Moranbacteria bacterium CG23_combo_of_CG06-09_8_20_14_all_41_28
2711768703	Candidatus Woesebacteria bacterium RIFOXYB1_FULL_42_36
2710723810	Candidatus Nomurabacteria bacterium RIFCSPLOWO2_01_FULL_41_52
2634166258	Acidovorax-75 (UID4105)
2785510883	Candidatus Dojkabacteria bacterium CG_4_10_14_3_um_filter_Dojkabacteria_WS6_41_9
2626541866	candidate division WS6 bacterium GW2011_GWE2_33_157
2626542321	Microgenomates bacterium GW2011_GWF1_38_5
2710724069	Candidatus Lindowbacteria bacterium RIFCSPLOWO2_02_FULL_62_12
2710264608	Candidatus Yanofskybacteria bacterium RIFCSPHIGHO2_02_FULL_43_12
2710723800	Candidatus Nomurabacteria bacterium RIFCSPLOWO2_01_FULL_36_10b
2626542123	Parcubacteria bacterium GW2011_GWB1_52_7
2708742759	candidate division WWE3 bacterium RBG_16_37_10
2626542213	Parcubacteria bacterium GW2011_GWC1_36_108
2626542168	Parcubacteria (Giovannonibacteria) bacterium GW2011_GWB1_44_23
2721755149	Spirochaetes bacterium GWB1_59_5
2626542386	candidate division WWE3 bacterium GW2011_GWE1_41_72
2708742705	Betaproteobacteria bacterium RBG_16_64_18
2710723584	Candidatus Levybacteria bacterium RIFCSPHIGHO2_12_FULL_39_39
2626542203	Parcubacteria bacterium GW2011_GWC2_48_17
2710724018	Candidatus Kuenenbacteria bacterium RIFCSPLOWO2_02_FULL_42_16
2785510817	candidate division Huberarchaea archaeon CG_4_8_14_3_um_filter_CG_151
2785511352	Candidatus Magasanikbacteria bacterium CG_4_10_14_0_8_um_filter_32_14
2716884178	Candidatus Nomurabacteria bacterium RIFOXYD1_FULL_42_14
2626542311	Microgenomates (Woesebacteria) bacterium GW2011_GWD1_41_12
2785511356	Candidatus Magasanikbacteria bacterium CG10_big_fil_rev_8_21_14_0_10_36_16
2626542131	Parcubacteria bacterium GW2011_GWB1_41_4
2626542237	Microgenomates (Collierbacteria) bacterium GW2011_GWA1_42_60
2626542113	Parcubacteria bacterium GW2011_GWB1_40_5
2711768337	Candidatus Rokubacteria bacterium RIFCSPLOWO2_12_FULL_71_22
2721755349	Omnitrophica bacterium RBG_13_46_9
2786546181	Unclassified archaeon CG06_land_8_20_14_3_00_37_11
2626542068	Parcubacteria (Wolfebacteria) bacterium GW2011_GWA2_47_9b
2721755293	candidate division Kazan bacterium RBG_13_50_9
2626542301	Microgenomates (Collierbacteria) bacterium GW2011_GWC2_45_15
2626542013	Candidatus Saccharibacteria bacterium GW2011_GWA2_46_10
2626542031	Parcubacteria bacterium GW2011_GWA2_46_10
2626542103	Parcubacteria bacterium GW2011_GWA2_56_7
2721755329	Bacteroidetes bacterium RBG_13_46_8
2626541864	Microgenomates bacterium GW2011_GWC1_37_8
2710724082	Candidatus Portnoybacteria bacterium RIFCSPLOWO2_02_FULL_40_15
2710264719	Candidatus Roizmanbacteria bacterium RIFCSPHIGHO2_02_FULL_40_13b
2626542221	Parcubacteria bacterium GW2011_GWC1_39_8
2619619052	Unclassified Chloroflexi bacterium bin152 (Genome Extraction)
2710264582	Candidatus Schekmanbacteria bacterium RIFCSPHIGHO2_02_FULL_38_11
2711768765	Burkholderiales bacterium RIFOXYC12_FULL_60_6
2785511350	Candidatus Magasanikbacteria bacterium CG10_big_fil_rev_8_21_14_0_10_42_10
2785511329	Candidatus Moranbacteria bacterium CG17_big_fil_post_rev_8_21_14_2_50_44_12
2654587954	Gammaproteobacteria bacterium SG8_30
2708742583	Bacteroidetes bacterium GWA2_33_15
2711768383	Candidatus Rokubacteria bacterium RIFCSPLOWO2_12_FULL_73_47
2785510807	Candidatus Pacearchaeota archaeon CG_4_9_14_0_8_um_filter_35_24
2785510969	Candidatus Kuenenbacteria bacterium CG10_big_fil_rev_8_21_14_0_10_36_11
2626542211	Parcubacteria (Campbellbacteria) bacterium GW2011_GWC1_35_31
2785511252	Candidatus Falkowbacteria bacterium CG10_big_fil_rev_8_21_14_0_10_39_11
2642422579	Actinobacteria TBE6_bin-05_acI
2710723593	Sphingopyxis sp. RIFCSPHIGHO2_12_FULL_65_19
2708742550	Candidatus Bathyarchaeota archaeon RBG_13_38_9
2710724023	Candidatus Zambryskibacteria bacterium RIFCSPLOWO2_02_FULL_44_12b
2710723854	Candidatus Levybacteria bacterium RIFCSPLOWO2_01_FULL_39_10
2626542201	Parcubacteria (Magasanikbacteria) bacterium GW2011_GWC2_45_8
2626541776	Microgenomates (Woesebacteria) bacterium GW2011_GWB1_31_29
2626542021	Berkelbacteria bacterium GW2011_GWB1_38_5
2710723885	Candidatus Pacebacteria bacterium RIFCSPLOWO2_01_FULL_47_12
2786546590	Zetaproteobacteria bacterium CG_4_9_14_3_um_filter_53_7
2786546934	Syntrophobacteraceae bacterium CG23_combo_of_CG06-09_8_20_14_all_50_8
2710724080	Candidatus Campbellbacteria bacterium RIFCSPLOWO2_02_FULL_35_11
2710264729	Sulfuricurvum sp. RIFCSPHIGHO2_02_FULL_43_9
2785510939	Parcubacteria bacterium CG_4_10_14_0_2_um_filter_7_35_8
2626542297	Microgenomates (Collierbacteria) bacterium GW2011_GWC2_43_12
2651869509	Actinobacteria FNEB7 bin_1 acI-B
2721755419	candidate division WOR-1 bacterium RIFOXYC2_FULL_37_10
2710264580	Alphaproteobacteria bacterium RIFCSPHIGHO2_02_FULL_42_30
2626542111	Parcubacteria (Nomurabacteria) bacterium GW2011_GWB1_40_11
2713897354	Elusimicrobia bacterium RIFOXYB12_FULL_50_12
2721755229	Clostridiales bacterium GWD2_32_19
2626541846	Parcubacteria (Nomurabacteria) bacterium GW2011_GWE2_36_115
2582580591	Composite genome from Lake Mendota Epilimnion pan-assembly MEint.metabat.6097
2710723698	Candidatus Woesebacteria bacterium RIFCSPLOWO2_01_FULL_39_10b
2710723829	Candidatus Zambryskibacteria bacterium RIFCSPLOWO2_01_FULL_47_14
2710723601	Gammaproteobacteria bacterium RIFCSPHIGHO2_12_FULL_45_12
2785511152	Candidatus Woesearchaeota archaeon CG11_big_fil_rev_8_21_14_0_20_43_8
2710723549	Candidatus Nomurabacteria bacterium RIFCSPHIGHO2_12_FULL_40_77
2708742577	Candidatus Jorgensenbacteria bacterium GWA1_49_17
2626542101	Parcubacteria (Magasanikbacteria) bacterium GW2011_GWA2_56_11
2626542011	Parcubacteria bacterium GW2011_GWF2_50_9
2785511250	Candidatus Falkowbacteria bacterium CG_4_10_14_0_2_um_filter_48_10
2710723629	Gammaproteobacteria bacterium RIFCSPHIGHO2_12_FULL_40_19
2785511244	Candidatus Wolfebacteria bacterium CG10_big_fil_rev_8_21_14_0_10_31_9
2708742694	Candidatus Beckwithbacteria bacterium RBG_13_35_6
2721755291	Ignavibacteria bacterium RBG_13_36_8
2786546312	candidate division WWE3 bacterium CG_4_10_14_0_2_um_filter_41_14
2626542286	Parcubacteria (Nomurabacteria) bacterium GW2011_GWE1_36_71
2710264736	Candidatus Doudnabacteria bacterium RIFCSPHIGHO2_02_FULL_46_11
2582580675	Composite genome from Trout Bog Hypolimnion pan-assembly TBhypo.metabat.3463
2785511052	Candidatus Shapirobacteria bacterium CG_4_9_14_0_2_um_filter_40_11
2626541960	Microgenomates (Daviesbacteria) bacterium GW2011_GWF2_38_6
2710264538	Candidatus Yanofskybacteria bacterium RIFCSPHIGHO2_02_FULL_44_12b
2711768711	Candidatus Roizmanbacteria bacterium RIFOXYB1_FULL_40_23
2710724013	Candidatus Levybacteria bacterium RIFCSPLOWO2_02_FULL_37_10
2711768567	candidate division WWE3 bacterium RIFOXYA2_FULL_43_12
2710723896	Candidatus Roizmanbacteria bacterium RIFCSPLOWO2_01_FULL_38_12
2785510788	Candidatus Pacearchaeota archaeon CG09_land_8_20_14_0_10_30_9
2711768322	Betaproteobacteria bacterium RIFCSPLOWO2_12_FULL_67_28
2626542007	Parcubacteria bacterium GW2011_GWA1_50_14
2785511150	candidate division Zixibacteria bacterium CG_4_9_14_3_um_filter_46_8
2711768494	Elusimicrobia bacterium RIFOXYA1_FULL_47_7
2785510792	Candidatus Pacearchaeota archaeon CG10_big_fil_rev_8_21_14_0_10_31_9
2737471644	Microcoleus vaginatus PCC9802
2721755416	Candidatus Falkowbacteria bacterium RIFOXYB2_FULL_34_18
2785511044	Candidatus Shapirobacteria bacterium CG_4_9_14_3_um_filter_39_13
2724678920	Candidatus Magasanikbacteria bacterium RIFOXYD2_FULL_39_9
2582580657	Composite genome from Trout Bog Hypolimnion pan-assembly TBhypo.metabat.2152
2785511334	Candidatus Moranbacteria bacterium CG23_combo_of_CG06-09_8_20_14_all_40_16
2788499805	Armatimonadetes bacterium CG_4_9_14_3_um_filter_66_14
2785510840	candidate division Gribaldobacteria bacterium CG_4_8_14_3_um_filter_42_11
2710723861	Candidatus Blackburnbacteria bacterium RIFCSPLOWO2_01_FULL_41_27
2785511175	Candidatus Beckwithbacteria bacterium CG_4_10_14_0_2_um_filter_47_25
2710723977	Betaproteobacteria bacterium RIFCSPLOWO2_02_64_14
2785510910	candidate division Howlettbacteria bacterium CG23_combo_of_CG06-09_8_20_14_all_37_9
2626542264	Parcubacteria bacterium GW2011_GWC2_32_10
2626542380	candidate division WWE3 bacterium GW2011_GWD1_42_14
2721755381	candidate division Zixibacteria bacterium RBG_16_48_11
2708742623	Deltaproteobacteria bacterium GWC2_42_51
2708742728	Actinobacteria bacterium RBG_16_55_12
2626542387	candidate division WWE3 bacterium GW2011_GWE1_42_16
2626542003	Parcubacteria (Nomurabacteria) bacterium GW2011_GWA1_37_20
2786546691	Candidatus Altiarchaeum sp. CG_4_10_14_0_8_um_filter_32_851
2626542146	candidate division TM6 bacterium GW2011_GWE2_31_21
2711768691	Candidatus Woesebacteria bacterium RIFOXYB1_FULL_38_16
[truncated: 2,911 more rows]
