# Supplementary material for: Non-host class II ribonucleotide reductase in Thermus viruses: sequence adaptation and host interaction
Source: PeerJ. 2019 Apr 8;7:e6700. doi: 10.7717/peerj.6700 (PMC6459318; doi:10.7717/peerj.6700)
Supplement: Supplemental Information 6 — Organism characteristics, such as optimal growth temperature and GC-content, used as raw data for the heat maps in Fig. 1B. [file peerj-07-6700-s006.xlsx]

## Sheet: Sheet1
Raw data Figure 1B
taxon	short_name	gc content [%]	size [Mbp]	n_genes	characteristics
Thermus_thermophilus	Thermus thermophilus	69.4	2.13	2173	TemperatureOptimum:68,TemperatureRange:Thermophilic
Thermus_brockianus	Thermus brockianus	67.1	2.39	2305	TemperatureOptimum:80,TemperatureRange:Thermophilic
Thermus_oshimai	Thermus oshimai	70.65	2.33	2376	TemperatureOptimum:70,TemperatureRange:Thermophilic
Thermus_caldophilus	Thermus caldophilus	74.1	2.13	2173	TemperatureOptimum:75,TemperatureRange:Thermophilic
Viruses_Thermus_virus_P7426_NrdJm@YP_001467983.1	Thermus virus P7426	57.8	0.083319	116	TemperatureOptimum:70,OxygenReq:Virus,TemperatureRange:Thermophilic
Viruses_Thermus_virus_P2345_NrdJm@YP_001467866.1	Thermus virus P2345	57.8	0.084201	117	TemperatureOptimum:70,OxygenReq:Virus,TemperatureRange:Thermophilic
Bacteria_Firmicutes_Clostridia_Clostridioides_difficile_NrdJm@WP_009899370.1	Clostridioides difficile	28.6	4.18455	3674	TemperatureOptimum:37,OxygenReq:Anaerobic,TemperatureRange:Mesophilic,Source:NCBI genus
Bacteria_Firmicutes_Clostridia_Anaerocolumna_jejuensis_NrdJm@WP_073279883.1	Anaerocolumna jejuensis	40.6	6.62127	5586	TemperatureOptimum:30,OxygenReq:Anaerobic,TemperatureRange:Mesophilic,Source: Ueki et al. 2016 (A. cellulosilytica)
Bacteria_Firmicutes_Clostridia_Anaerocolumna_xylanovorans_NrdJm@WP_073589017.1	Anaerocolumna xylanovorans	40.2	5.42033	4587	OxygenReq:Anaerobic,TemperatureRange:Mesophilic,Source: Ueki et al. 2016 (A. cellulosilytica)
Bacteria_Firmicutes_Clostridia_Clostridium_sp._KNHs205_NrdJm@WP_033167051.1	Clostridium sp. KNHs205	37.6	3.2176	2792	OxygenReq:Anaerobic,TemperatureRange:Mesophilic,Source: -
Bacteria_Firmicutes_Clostridia_Clostridium_uliginosum_NrdJm@WP_090091207.1	Clostridium uliginosum	28.1	4.08097	3377	TemperatureOptimum:22.5,OxygenReq:Anaerobic,TemperatureRange:Mesophilic,Source:Matthies et al. 2001
Bacteria_Firmicutes_Clostridia_Clostridium_vincentii_NrdJm@WP_106058987.1	Clostridium vincentii	30.7	3.50583	3246	OxygenReq:Anaerobic,TemperatureRange:Psychrophilic,TemperatureOptimum:12,Source: Mountfort et al. 1997
Bacteria_Firmicutes_Clostridia_Clostridium_sp._LS_NrdJm@WP_008421111.1	Clostridium sp. LS	37.6	3.2176	2792	OxygenReq:Anaerobic,TemperatureRange:Mesophilic,Source: -
Bacteria_Firmicutes_Clostridia_Clostridium_chromiireducens_NrdJm@WP_079439238.1	Clostridium chromiireducens	30.1	5.64576	4811	OxygenReq:Anaerobic,TemperatureRange:Mesophilic,Source: Inglett et al. 2011
Bacteria_Firmicutes_Clostridia_Clostridium_beijerinckii_NrdJm@WP_026887092.1	Clostridium beijerinckii	29.65	5.996	5037	OxygenReq:Anaerobic,TemperatureRange:Mesophilic,Source: -
Bacteria_Firmicutes_Clostridia_Clostridium_sp._DLVIII_NrdJm@WP_009171325.1	Clostridium sp. DLVIII	37.6	3.2176	2792	OxygenReq:Anaerobic,TemperatureRange:Mesophilic,Source: -
Bacteria_Firmicutes_Clostridia_Clostridium_saccharobutylicum_NrdJm@WP_077394593.1	Clostridium saccharobutylicum	28.7	5.10799	4145	OxygenReq:Anaerobic,TemperatureRange:Mesophilic,Source: Keis et al. 2001
Bacteria_Firmicutes_Clostridia_Herbinix_hemicellulosilytica_NrdJm@WP_103203604.1	Herbinix hemicellulosilytica	36.7	3.03661	2607	TemperatureOptimum:55,OxygenReq:Anaerobic,TemperatureRange:Thermophilic,Source: Koeck et al. 2015
Bacteria_Firmicutes_Clostridia_Herbinix_luporum_NrdJm@WP_058258980.1	Herbinix luporum	35.3	2.60935	2279	TemperatureOptimum:52.5,OxygenReq:Anaerobic,TemperatureRange:Thermophilic,Source: Koeck et al. 2016
Bacteria_Firmicutes_Clostridia_Clostridium_perfringens_NrdJm@WP_061429851.1	Clostridium perfringens	28	3.50831	3011	TemperatureOptimum:47,OxygenReq:Anaerobic,TemperatureRange:Mesophilic,Source: WP
Bacteria_Firmicutes_Clostridia_Halanaerobium_salsuginis_NrdJm@WP_089862435.1	Halanaerobium salsuginis	32.7	2.99119	2715	OxygenReq:Anaerobic,TemperatureRange:Mesophilic,Source: Bhupathiraju et al. 1994
Bacteria_Firmicutes_Clostridia_Halanaerobium_hydrogeniformans_NrdJm@WP_013404633.1	Halanaerobium hydrogeniformans	33.2	2.61312	2311	TemperatureOptimum:33,Salinity:ModerateHalophilic, OxygenReq:Anaerobic, TemperatureRange:Mesophilic, Habitat:Specialized,Source:NCBI genome
Bacteria_Firmicutes_Clostridia_Halanaerobium_congolense_NrdJm@WP_081374557.1	Halanaerobium congolense	33	2.92051	2644	OxygenReq:Anaerobic,TemperatureRange:Mesophilic,Source: Ravot et al. 1997
Bacteria_Firmicutes_Clostridia_Parasporobacterium_paucivorans_NrdJm@WP_073993840.1	Parasporobacterium paucivorans	44.1	2.44376	2300	TemperatureOptimum:35.5,OxygenReq:Anaerobic,TemperatureRange:Mesophilic,Source: Lomans et al. 2001
Bacteria_Firmicutes_Clostridia_Butyricicoccus_pullicaecorum_NrdJm@WP_087372021.1	Butyricicoccus pullicaecorum	54.1	3.28449	3043	OxygenReq:Anaerobic,TemperatureRange:Mesophilic,Source: Eeckhaut et al. 2008
Bacteria_Firmicutes_Clostridia_Anaerofilum_sp._An201_NrdJm@WP_087294091.1	Anaerofilum sp. An201	60.4	3.22366	2902	OxygenReq:Anaerobic,TemperatureRange:Mesophilic,Source: Zellner et al. 1996 (A. pentosovorans & A. agile)
Bacteria_Firmicutes_Clostridia_Ruminococcus_gauvreauii_NrdJm@WP_083963382.1	Ruminococcus gauvreauii	47.6	4.09471	3685	OxygenReq:Anaerobic,TemperatureRange:Mesophilic,Source: Domingo et al. 2008
Bacteria_Firmicutes_Clostridia_Lachnoclostridium_sp._An196_NrdJm@WP_087154865.1	Lachnoclostridium sp. An196	43.2	3.08894	3020	OxygenReq:Anaerobic,TemperatureRange:Mesophilic,Source: -
Bacteria_Firmicutes_Clostridia_Blautia_schinkii_NrdJm@WP_044947153.1	Blautia schinkii	45.6	6.67933	5648	OxygenReq:Anaerobic,TemperatureRange:Mesophilic,Source: Rieu-Lesme et al. 1996
Bacteria_Firmicutes_Clostridia_Gemmiger_sp._An120_NrdJm@WP_087170418.1	Gemmiger sp. An120	59	3.38956	3027	OxygenReq:Anaerobic,TemperatureRange:Mesophilic,Source: Gossling & Moore 1975
Bacteria_Firmicutes_Clostridia_Anaeromassilibacillus_sp._An200_NrdJm@WP_087238540.1	Anaeromassilibacillus sp. An200	49.75	3.17969	2632	OxygenReq:Anaerobic,TemperatureRange:Mesophilic,Source: Guilhot et al. 2016
Bacteria_Firmicutes_Clostridia_Clostridiales_bacterium_MarseilleP2846_NrdJm@WP_102410887.1	Clostridiales bacterium MarseilleP2846	60.8	4.18257	3653	OxygenReq:Anaerobic,TemperatureRange:Mesophilic,Source: WP genus
Bacteria_Firmicutes_Clostridia_Clostridiales_bacterium_MCWD3_NrdJm@WP_066496525.1	Clostridiales bacterium MCWD3	28.8	4.78636	3955	OxygenReq:Anaerobic,TemperatureRange:Mesophilic,Source: WP genus
Bacteria_Firmicutes_Clostridia_Fusibacter_sp._3D3_NrdJm@WP_069876461.1	Fusibacter sp. 3D3	37.6	5.11125	4448	Salinity:ModerateHalophilic, OxygenReq:Microaerophilic, TemperatureOptimum:30, TemperatureRange:Mesophilic, Habitat:Aquatic,Source:NCBI genome
Bacteria_Firmicutes_Tissierellia_Sedimentibacter_sp._B4_NrdJm@WP_019230189.1	Sedimentibacter sp. B4	42.45	3.61902	3164	OxygenReq:Anaerobic,TemperatureRange:Mesophilic,Source:Breitenstein et al. 2002 (S. hydroxybenzoicus)
Bacteria_Firmicutes_Tissierellia_Dethiosulfatibacter_aminovorans_NrdJm@WP_073049494.1	Dethiosulfatibacter aminovorans	40	4.03412	3531	TemperatureOptimum:29,OxygenReq:Anaerobic,TemperatureRange:Mesophilic,Source: Takii et al. 2007
Bacteria_Firmicutes_Clostridia_Acidaminobacter_hydrogenoformans_NrdJm@WP_092593339.1	Acidaminobacter hydrogenoformans	48.8	3.61561	3199	OxygenReq:Anaerobic,TemperatureRange:Mesophilic,Source: Stams & Hansen 1984
Bacteria_Firmicutes_Clostridia_Clostridium_fallax_NrdJm@WP_072895524.1	Clostridium fallax	26.8	2.79981	2438	OxygenReq:Anaerobic,TemperatureRange:Mesophilic,Source: -
Bacteria_Firmicutes_Clostridia_Clostridium_sp._C8_NrdJm@WP_047002262.1	Clostridium sp. C8	37.6	3.2176	2792	OxygenReq:Anaerobic,TemperatureRange:Mesophilic,Source: -
Bacteria_Firmicutes_Clostridia_Acetoanaerobium_noterae_NrdJm@WP_079590562.1	Acetoanaerobium noterae	33.4	2.81423	2663	OxygenReq:Anaerobic,TemperatureRange:Mesophilic,Source: Sleat et al. 1985
Bacteria_Firmicutes_Clostridia_Proteocatella_sphenisci_NrdJm@WP_028830066.1	Proteocatella sphenisci	36.5	2.41106	2223	TemperatureOptimum:29,OxygenReq:Anaerobic,TemperatureRange:Mesophilic,Source: Pikuta et al. 2009
Bacteria_Firmicutes_endosymbiont_TC1_of_Trimyema_compressum_NrdJm@WP_088370373.1	Trimyema compressum	32.7316	1.62225	1722	OxygenReq:Anaerobic,TemperatureRange:Mesophilic,Source: Shinzato et al. 2017
Bacteria_Firmicutes_Negativicutes_Acetonema_longum_NrdJm@WP_004100105.1	Acetonema longum	50.4	4.32301	3847	TemperatureOptimum:31.5,OxygenReq:Anaerobic,TemperatureRange:Mesophilic,Source: Kane & Breznak 1991
Bacteria_Firmicutes_Clostridia_Clostridium_formicaceticum_NrdJm@WP_070964411.1	Clostridium formicaceticum	35.5	4.58675	4044	OxygenReq:Anaerobic,TemperatureRange:Mesophilic,Source: -
Bacteria_Firmicutes_Clostridia_Clostridium_aceticum_NrdJm@WP_044825893.1	Clostridium aceticum	35.2476	4.18288	3721	OxygenReq:Anaerobic,TemperatureRange:Mesophilic,Source: -
Bacteria_Firmicutes_Clostridia_Anaerovirgula_multivorans_NrdJm@WP_089282876.1	Anaerovirgula multivorans	34.9	5.389	4897	TemperatureOptimum:35,OxygenReq:Anaerobic,TemperatureRange:Mesophilic,Source: Pikuta et al. 2006
Bacteria_Firmicutes_Clostridia_Natronincola_peptidivorans_NrdJm@WP_090446557.1	Natronincola peptidivorans	35.5	3.76898	3427	OxygenReq:Anaerobic,TemperatureRange:Mesophilic,Source: Zhilina et al. 2009
Bacteria_Firmicutes_Clostridia_Natronincola_ferrireducens_NrdJm@WP_090554938.1	Natronincola ferrireducens	35	3.10708	2852	OxygenReq:Anaerobic,TemperatureRange:Mesophilic,Source: Zhilina et al. 2009
Bacteria_Firmicutes_Clostridia_Inediibacterium_massiliense_NrdJm@WP_053956209.1	Inediibacterium massiliense	30.4	3.49728	3185	OxygenReq:Anaerobic,TemperatureRange:Mesophilic,Source: Alou et al. 2017
Bacteria_Firmicutes_Clostridia_Alkaliphilus_peptidifermentans_NrdJm@WP_091547079.1	Alkaliphilus peptidifermentans	34.1	4.45979	4072	OxygenReq:Anaerobic,TemperatureRange:Mesophilic,Source: Cao et al. 2003 (A. crotonatoxidans)
Bacteria_Firmicutes_Clostridia_Alkaliphilus_metalliredigens_NrdJm@WP_012065483.1	Alkaliphilus metalliredigens	36.8	4.92957	4641	TemperatureOptimum:35,OxygenReq:Anaerobic,Salinity:ModerateHalophilic, TemperatureRange:Mesophilic,Source:NCBI genome + Cao et al. 2003 (A. crotonatoxidans)
Bacteria_Firmicutes_Clostridia_Alkaliphilus_oremlandii_NrdJm@WP_012158329.1	Alkaliphilus oremlandii	36.3	3.12356	2898	OxygenReq:Anaerobic, TemperatureRange:Mesophilic, Habitat:Aquatic,Source:NCBI genome
Bacteria_Firmicutes_Clostridia_Peptoclostridium_acidaminophilum_NrdJm@WP_051489051.1	Peptoclostridium acidaminophilum	44.0529	3.05504	2779	Salinity:Mesophilic, OxygenReq:Anaerobic, TemperatureOptimum:28, TemperatureRange:Mesophilic, Habitat:Terrestrial,Source:NCBI genome
Bacteria_Firmicutes_Clostridia_Tindallia_californiensis_NrdJm@WP_093315575.1	Tindallia californiensis	39.8	3.12207	2789	OxygenReq:Anaerobic,TemperatureRange:Mesophilic,TemperatureOptimum:37,Source:Pikuta et al. 2003
Bacteria_Firmicutes_Clostridia_Alkaliphilus_transvaalensis_NrdJm@WP_026478148.1	Alkaliphilus transvaalensis	34	4.02484	3640	OxygenReq:Anaerobic,TemperatureRange:Mesophilic,Source: Cao et al. 2003 (A. crotonatoxidans)
Bacteria_Firmicutes_Clostridia_Anaeromicrobium_sediminis_NrdJm@WP_095135233.1	Anaeromicrobium sediminis	31.3	4.71059	4226	TemperatureOptimum:37,OxygenReq:Anaerobic,TemperatureRange:Mesophilic,Source: Zhang et al. 2017
Bacteria_Firmicutes_Clostridia_Anaerovorax_odorimutans_NrdJm@WP_037372085.1	Anaerovorax odorimutans	31.5	3.26352	2825	TemperatureOptimum:30,OxygenReq:Anaerobic,TemperatureRange:Mesophilic,Source: Matthies et al. 2000
Bacteria_Firmicutes_Clostridia_Anaerovirgula_multivorans_NrdJm@WP_089282284.1	Anaerovirgula multivorans	34.9	5.389	4897	TemperatureOptimum:35,OxygenReq:Anaerobic,TemperatureRange:Mesophilic,Source: Pikuta et al. 2006
Bacteria_Firmicutes_Bacilli_Brevibacillus_sp._SKDU10_NrdJm@WP_082890893.1	Brevibacillus sp. SKDU10	47.3	5.8007	5354	OxygenReq:Aerobic,TemperatureRange:Mesophilic,Source: Bergey genus
Bacteria_Firmicutes_Bacilli_Brevibacillus_laterosporus_NrdJm@WP_083208788.1	Brevibacillus laterosporus	40.75	5.21905	4381	OxygenReq:Aerobic,TemperatureRange:Mesophilic,Source: Bergey genus
Bacteria_Firmicutes_Bacilli_Marininema_halotolerans_NrdJm@WP_091836798.1	Marininema halotolerans	44.8	3.5686	3320	TemperatureOptimum:28,OxygenReq:Aerobic,TemperatureRange:Mesophilic,Source: Zhang et al. 2013
Bacteria_Firmicutes_Bacilli_Paenibacillus_sp._FF9_NrdJm@WP_054955013.1	Paenibacillus sp. FF9	47.25	6.8513	5849	OxygenReq:Facultative,TemperatureRange:Mesophilic,Source: WP genus
Bacteria_Firmicutes_Bacilli_Paenibacillus_polymyxa_NrdJm@WP_025365296.1	Paenibacillus polymyxa	45.5	5.77606	4884	OxygenReq:Facultative,TemperatureRange:Mesophilic,Source: WP genus
Bacteria_Firmicutes_Bacilli_Paenibacillus_terrigena_NrdJm@WP_018755170.1	Paenibacillus terrigena	46.1	6.36156	5662	OxygenReq:Facultative,TemperatureRange:Mesophilic,Source: WP genus
Bacteria_Firmicutes_Bacilli_Bacillus_solani_NrdJm@WP_082446824.1	Bacillus solani	37.5	5.3156	5071	TemperatureOptimum:35,OxygenReq:Facultative,TemperatureRange:Mesophilic,Source: Liu et al. 2015
Bacteria_Firmicutes_Bacilli_Sporosarcina_koreensis_NrdJm@WP_082713763.1	Sporosarcina koreensis	42.75	3.0226	3437	OxygenReq:Facultative,TemperatureRange:Mesophilic,Source:WP genus
Bacteria_Firmicutes_Bacilli_Brevibacillus_massiliensis_NrdJm@WP_019119372.1	Brevibacillus massiliensis	53	5.06036	47.39	TemperatureOptimum:37,OxygenReq:Aerobic,TemperatureRange:Mesophilic,Source: Bergey genus
Bacteria_Firmicutes_Bacilli_Brevibacillus_sp._BC25_NrdJm@WP_007725342.1	Brevibacillus sp. BC25	47.3	5.8007	5354	OxygenReq:Aerobic,TemperatureRange:Mesophilic,Source: Bergey genus
Bacteria_Firmicutes_Bacilli_Brevibacillus_borstelensis_NrdJm@WP_003387997.1	Brevibacillus borstelensis	51.9	5.19658	4955	TemperatureOptimum:55,OxygenReq:Aerobic,TemperatureRange:Thermophilic,Source: Bergey genus
Bacteria_Firmicutes_Bacilli_Brevibacillus_brevis_NrdJm@WP_064199138.1	Brevibacillus brevis	47.3	6.43466	5771	OxygenReq:Aerobic,TemperatureRange:Mesophilic,Source: Bergey genus
Bacteria_Firmicutes_Bacilli_Marinilactibacillus_sp._15R_NrdJm@WP_072693254.1	Marinilactibacillus sp. 15R	35.4	2.76791	2550	OxygenReq:Anaerobic,TemperatureRange:Mesophilic,Source: Ishikawa 2003
Bacteria_Firmicutes_Bacilli_Amphibacillus_xylanus_NrdJm@WP_015010930.1	Amphibacillus xylanus	35.7	2.56949	2330	OxygenReq:Facultative, TemperatureRange:Mesophilic,Source:NCBI genome
Bacteria_Firmicutes_Bacilli_Brevibacillus_agri_NrdJm@WP_025846541.1	Brevibacillus agri	53.7	5.38649	4823	OxygenReq:Aerobic,TemperatureRange:Mesophilic,Source: Bergey genus
Bacteria_Firmicutes_Bacilli_Bacillus_sp._NSP2.1_NrdJm@WP_081414795.1	Bacillus sp. NSP2.1	38.6	4.95608	4658	OxygenReq:Facultative,TemperatureRange:Mesophilic,Source: Bacillus genus
Bacteria_Firmicutes_Bacilli_Brevibacillus_borstelensis_NrdJm@WP_003386561.1	Brevibacillus borstelensis	51.9	5.19658	4955	OxygenReq:Aerobic,TemperatureRange:Mesophilic,Source: Bergey genus
Bacteria_Firmicutes_Bacilli_Brevibacillus_sp._WF146_NrdJm@WP_065068364.1	Brevibacillus sp. WF146	47.3	5.8007	5354	OxygenReq:Aerobic,TemperatureRange:Mesophilic,Source: Bergey genus
Bacteria_Firmicutes_Bacilli_Thermoflavimicrobium_dichotomicum_NrdJm@WP_093231786.1	Thermoflavimicrobium dichotomicum	42.5	3.85279	3444	TemperatureOptimum:55,OxygenReq:Aerobic,TemperatureRange:Thermophilic,Source:Bergey genus
Bacteria_Firmicutes_Bacilli_Shimazuella_kribbensis_NrdJm@WP_051271258.1	Shimazuella kribbensis	38.4	4.1851	4069	TemperatureOptimum:32,OxygenReq:Aerobic,TemperatureRange:Mesophilic,Source:Park et al. 2007
Bacteria_Firmicutes_Tissierellia_Tissierellia_bacterium_S5A11_NrdJm@WP_034437189.1	Tissierellia bacterium S5A11	45.8	3.29067	3060	OxygenReq:Anaerobic,TemperatureRange:Mesophilic,TemperatureOptimum:37,Source:Bergey genus
Bacteria_Firmicutes_Clostridia_Clostridium_felsineum_NrdJm@WP_077892845.1	Clostridium felsineum	29.9	5.17865	4541	OxygenReq:Anaerobic,TemperatureRange:Mesophilic,Source: -
Bacteria_Firmicutes_Clostridia_Anaerocolumna_aminovalerica_NrdJm@WP_091686078.1	Anaerocolumna aminovalerica	35	4.60706	3862	OxygenReq:Anaerobic,TemperatureRange:Mesophilic,Source: Ueki et al. 2016 (A. cellulosilytica)
Bacteria_Firmicutes_Clostridia_Clostridium_sp._MarseilleP299_NrdJm@WP_066714498.1	Clostridium sp. MarseilleP299	37.6	3.2176	2792	OxygenReq:Anaerobic,TemperatureRange:Mesophilic,Source: -
Bacteria_Firmicutes_Bacilli_Bacillus_cereus_NrdJm@WP_098544481.1	Bacillus cereus	35.1	5.75897	5727	TemperatureOptimum:39,OxygenReq:Facultative,TemperatureRange:Mesophilic,Source: WP
