# Supplementary material for: Non-host class II ribonucleotide reductase in Thermus viruses: sequence adaptation and host interaction
Source: PeerJ. 2019 Apr 8;7:e6700. doi: 10.7717/peerj.6700 (PMC6459318; doi:10.7717/peerj.6700)
Supplement: Supplemental Information 7 — Best alignment of Thermus phage P74-26 proteins to the NCBI RefSeq database with annotated function, identity of the best match and data of the alignment. Raw data for Table S8. [file peerj-07-6700-s007.xlsx]

## Sheet: Sheet1
Raw data of Table S8: Best alignment of Thermus phage P74-26 proteins to the NCBI RefSeq database.
Gene number in Thermus phage P74-26	Genbank accession number for Thermus phage P74-26 protein	Annotated function for Thermus phage P74-26 proteins	Accession number of best match	Species, best match	Kingdom	Phylum	% amino acid identity	alignment length	mismatches	gap opens	evalue	bit score
5	YP_001467975	phage XerD-like integrase	WP_084542912.1	Deinococcus murrayi	Bacteria	Deinococcus-Thermus	46.32	285	149	2	8e-66	258
9	YP_001467979	RecB family exonuclease	WP_101394055.1	Tetrasphaera duodecadis	Bacteria	Actinobacteria	24.2	281	169	9	3e-09	69.7
11	YP_001467981	DNA polymerase I	WP_017841024.1	Methylomicrobium buryatense	Bacteria	Proteobacteria	35.31	473	247	12	4e-65	257
12	YP_001467982	hypothetical protein	WP_013159826.1	Meiothermus silvanus	Bacteria	Deinococcus-Thermus	31.67	221	113	7	5e-10	71.2
13	YP_001467983	ribonucleoside-triphosphate reductase	WP_061429851.1	Clostridium perfringens	Bacteria	Firmicutes	40.88	685	353	14	3e-137	497
14	YP_001467984	C5 cytosine-specific DNA methylase	WP_100590423.1	Campylobacter lanienae	Bacteria	Proteobacteria	44.35	363	157	7	1e-76	294
15	YP_001467985	hypothetical protein	WP_113546534.1	Rhizobiales bacterium	Bacteria	Proteobacteria	34.88	129	77	4	7e-12	77
18	YP_001467988	hypothetical protein	WP_052155205.1	Thermus sp. 2.9	Bacteria	Deinococcus-Thermus	58.23	79	33	0	7e-15	87
19	YP_001467989	hypothetical protein	WP_115418177.1	Erythrobacter sp. YH-07	Bacteria	Proteobacteria	40.98	122	64	4	2e-12	79.3
20	YP_001467990	hypothetical protein	WP_015717495.1	Thermus scotoductus	Bacteria	Deinococcus-Thermus	44	100	51	2	2e-10	72
22	YP_001467992	thymidylate synthase ThyX	WP_015717674.1	Thermus	Bacteria	Deinococcus-Thermus	58.13	246	74	2	4e-72	278
26	YP_001467996	dNMP kinase	WP_109684995.1	Branchiibius hedensis	Bacteria	Actinobacteria	27.46	193	97	8	0.0002	52.8
27	YP_001467997	dUTP diphosphatase	WP_118470283.1	Coprobacillus sp. AF31-1BH	Bacteria	Firmicutes	26.51	166	100	6	2e-07	62.4
30	YP_001468000	deoxycytidine triphosphate deaminase	WP_104631480.1	Streptomyces sp. MH60	Bacteria	Actinobacteria	38.25	183	90	8	8e-13	80.1
38	YP_001468008	eukaryotic type DNA primase small subunit	WP_007785667.1	Brevibacillus sp. CF112	Bacteria	Firmicutes	29.62	260	147	11	4e-17	96.7
42	YP_001468012	Archaeal-type Holliday junction resolvase	WP_092876513.1	Rhizobiales bacterium GAS188	Bacteria	Proteobacteria	50.85	59	29	0	9e-07	60.1
44	YP_001468014	replicative DNA helicase DnaB	WP_096373608.1	Pseudomonas chlororaphis	Bacteria	Proteobacteria	29.57	230	146	7	5e-10	73.6
46	YP_001468016	hypothetical protein	WP_012871795.1	Sphaerobacter thermophilus	Bacteria	Chloroflexi	39.71	136	60	4	5e-15	88.2
49	YP_001468019	chaperone/ATP-dependent lon protease	WP_020197945.1	Vibrio owensii	Bacteria	Proteobacteria	27.44	215	135	7	5e-08	65.5
51	YP_001468021	hypothetical protein	WP_119358636.1	Meiothermus granaticius	Bacteria	Deinococcus-Thermus	51	107	45	3	5e-09	67.4
54	YP_001468024	metal-dependent hydrolase	WP_066618692.1	Rufibacter roseus	Bacteria	Bacteroidetes	33.62	229	138	7	5e-24	119
57	YP_001468027	hypothetical protein	WP_041438523.1	Thermus scotoductus	Bacteria	Deinococcus-Thermus	47.22	108	56	1	1e-18	99.8
81	YP_001468051	ParB-like nuclease/partitioning protein	WP_113152754.1	Nitratireductor sp. OM-1	Bacteria	Proteobacteria	38.89	72	37	1	2e-06	59.7
84	YP_001468054	phage terminase large subunit	WP_053001076.1	Kosmotoga pacifica	Bacteria	Thermotogae	36.26	433	231	11	4e-56	227
85	YP_001468055	portal protein	WP_035648696.1	Bradyrhizobium sp. ORS 285	Bacteria	Proteobacteria	28.05	353	217	13	5e-18	100
88	YP_001468058	major head protein	WP_119367080.1	Clostridium chromiireducens	Bacteria	Firmicutes	24.02	358	229	12	1e-10	75.5
93	YP_001468063	hypothetical protein	WP_012057658.1	Thermosipho melanesiensis	Bacteria	Thermotogae	26.27	316	180	12	1e-05	58.9
95	YP_001468065	tape tail measure protein	WP_072597359.1	Sphingomonas sp. JJ-A5	Bacteria	Proteobacteria	51.4	107	48	4	4e-17	101
100	YP_001468070	hypothetical protein	WP_066619836.1	Clostridium magnum	Bacteria	Firmicutes	24.52	367	261	8	8e-15	89.7
102	YP_001468072	WD40-like beta-propeller protein	WP_119361460.1	Meiothermus cateniformans	Bacteria	Deinococcus-Thermus	29.19	185	123	4	8e-12	80.1
104	YP_001468074	hypothetical protein	NP_777341.1	Thermus virus IN93	Viruses	Thermus virus	50.43	117	58	0	6e-24	119
107	YP_001468077	peptidoglycan hydrolase	WP_077315815.1	Basilea psittacipulmonis	Bacteria	Proteobacteria	37.66	77	48	0	1e-08	66.2
109	YP_001468079	metal-dependent hydrolase	WP_077616944.1	Caenibacillus caldisaponilyticus	Bacteria	Firmicutes	28.74	254	161	10	1e-18	101
111	YP_001468081	zinc metallopeptidase motif-containing protein	YP_874052.1	Thermus phage phiYS40	Viruses	Thermus virus	38.03	142	83	4	9e-19	99.8
